# Supplementary material for: Influential Insider: Wolbachia, an Intracellular Symbiont, Manipulates Bacterial Diversity in Its Insect Host
Source: MDPI journal article supplement (doi:10.3390/microorganisms9061313), 2021-06-16
Supplement: s1 [file s1]

## ***Supporting Information***

---

### **INFLUENTIAL INSIDER: *WOLBACHIA*, AN INTRACELLULAR SYMBIONT, MANIPULATES BACTERIAL DIVERSITY IN ITS INSECT HOST**

Morgane Ourry<sup>1,\*</sup>, Agathe Crosland<sup>2</sup>, Valérie Lopez<sup>2</sup>, Stéphane A.P. Derocles<sup>2</sup>, Christophe Mougél<sup>1</sup>, Anne Marie Cortesero<sup>2</sup> & Denis Poinso<sup>2</sup>

**\* Correspondence:**

Morgane Ourry

morgane.ourry@hotmail.fr

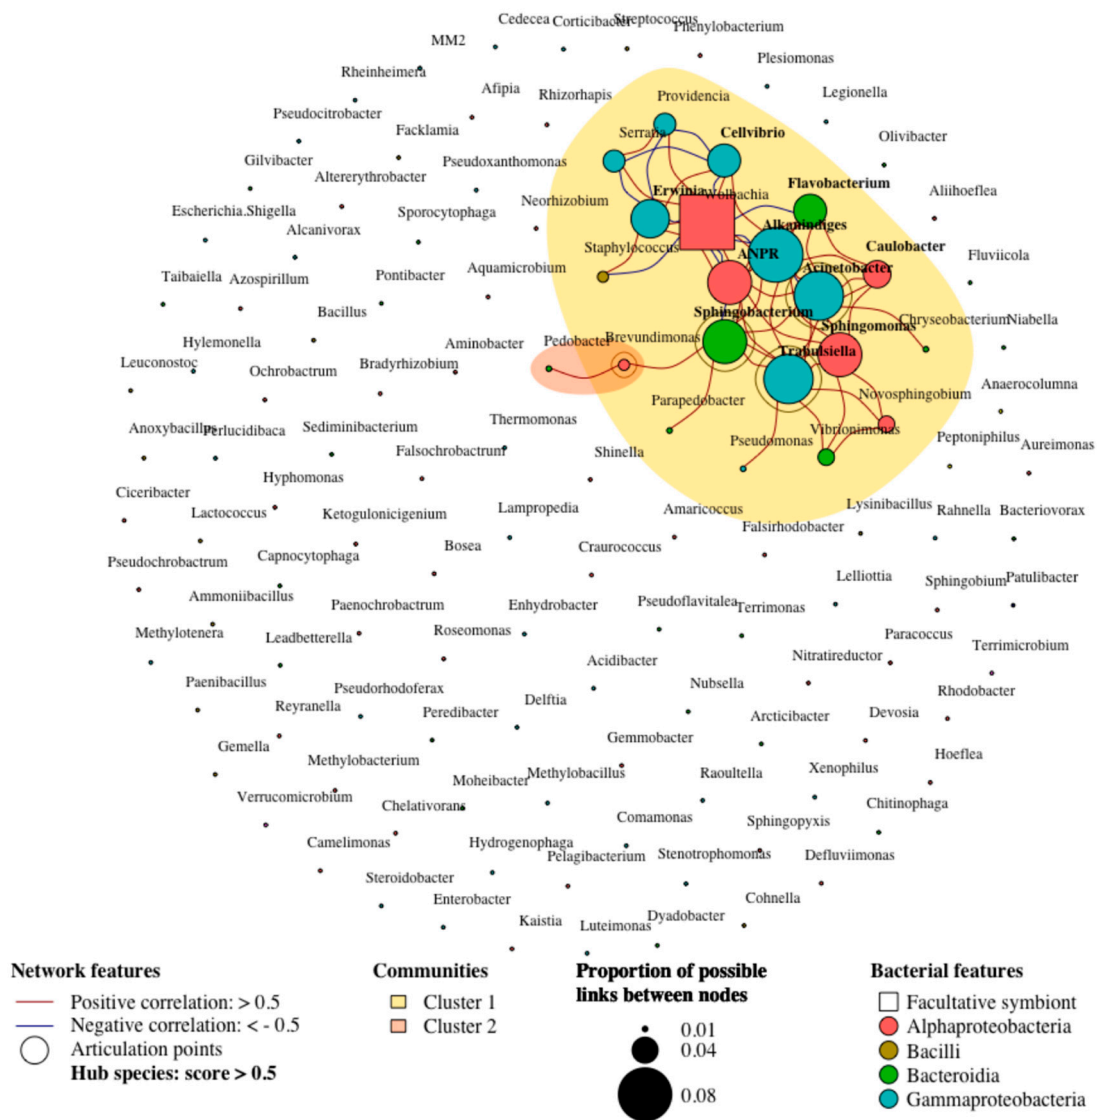

**Figure S5.** Network of bacterial communities associated to *Wolbachia*-free and infected lines altogether. Taxa represented are genera. Number of vertices: 125. Number of edges: 54.

ANPR = *Allorhizobium-Neorhizobium-Pararhizobium-Rhizobium*
