# Supplementary material for: Influential Insider: Wolbachia, an Intracellular Symbiont, Manipulates Bacterial Diversity in Its Insect Host
Source: MDPI journal article supplement (doi:10.3390/microorganisms9061313), 2021-06-16
Supplement: s1 [file s1]

## ***Supporting Information***

---

### **INFLUENTIAL INSIDER: *WOLBACHIA*, AN INTRACELLULAR SYMBIONT, MANIPULATES BACTERIAL DIVERSITY IN ITS INSECT HOST**

Morgane Ourry<sup>1,\*</sup>, Agathe Crosland<sup>2</sup>, Valérie Lopez<sup>2</sup>, Stéphane A.P. Derocles<sup>2</sup>, Christophe Mougél<sup>1</sup>, Anne Marie Cortesero<sup>2</sup> & Denis Poinso<sup>2</sup>

**\* Correspondence:**

Morgane Ourry

morgane.ourry@hotmail.fr

A

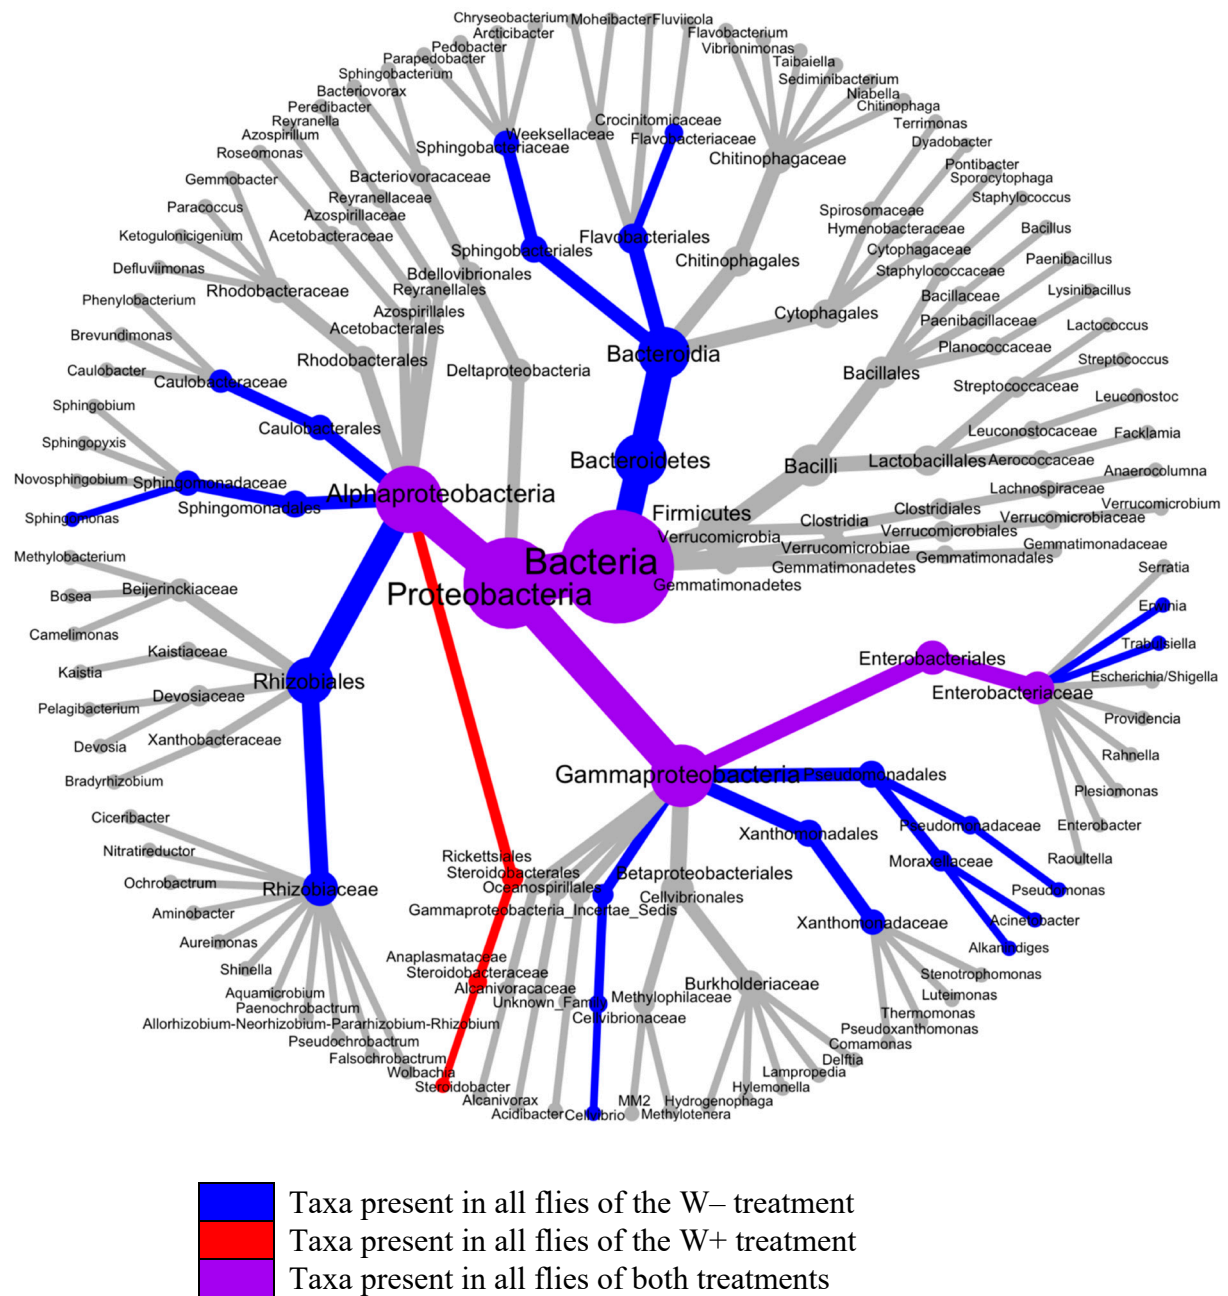

B

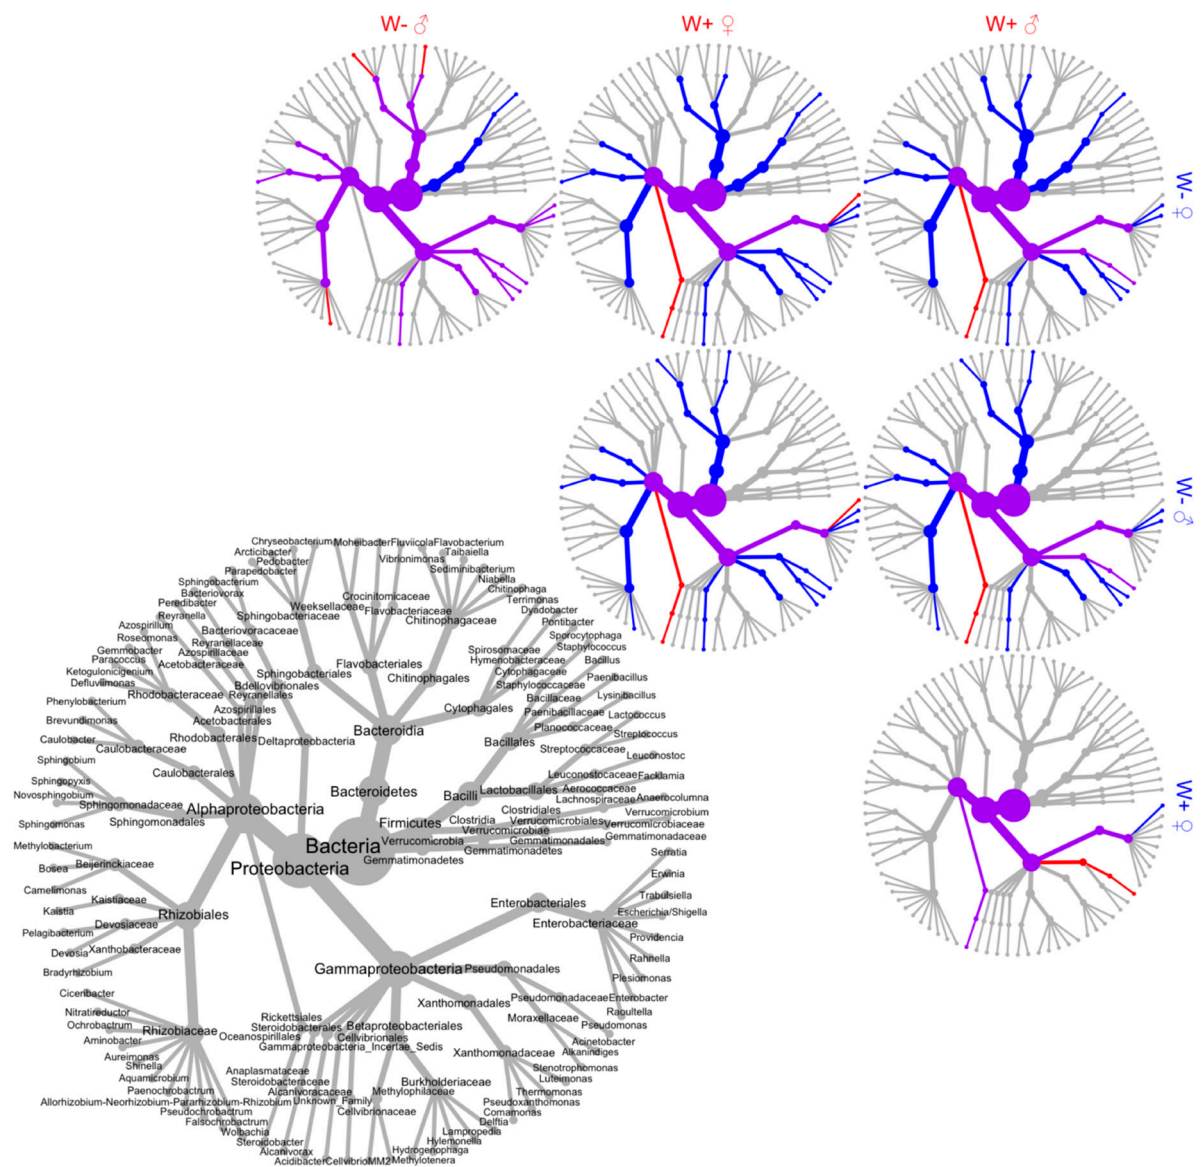

**Figure S4.** Heat tree comparing taxa presence (A) between *Wolbachia*-free (“W–”) and infected (“W+”) lines and (B) between female and male W– and W+ lines. (B) Taxa colored in blue are present in all flies of the treatment shown in the row, taxa colored in red are present in all flies of the treatment shown in the column and taxa colored in purple are present in all flies of both treatments shown in the row and the column. The grey tree on the lower left functions as a key for the smaller unlabeled trees.
