# Supplementary material for: Influential Insider: Wolbachia, an Intracellular Symbiont, Manipulates Bacterial Diversity in Its Insect Host
Source: Microorganisms. 2021 Jun 16;9(6):1313. doi: 10.3390/microorganisms9061313 (PMC8234596; doi:10.3390/microorganisms9061313)
Supplement: Supplementary file 1 [file microorganisms-09-01313-s001.zip]

Archive with 8 entries (8 files):
- Wolbachia_Figure_S1.pdf
- Wolbachia_Figure_S2.pdf
- Wolbachia_Figure_S3.pdf
- Wolbachia_Figure_S4.pdf
- Wolbachia_Figure_S5.pdf
- Wolbachia_Figure_S6.pdf
- Wolbachia_Table_S1.xlsx
- Wolbachia_Table_S2.xlsx
