# Supplementary material for: Influential Insider: Wolbachia, an Intracellular Symbiont, Manipulates Bacterial Diversity in Its Insect Host
Source: Microorganisms. 2021 Jun 16;9(6):1313. doi: 10.3390/microorganisms9061313 (PMC8234596; doi:10.3390/microorganisms9061313)
Supplement: Supplementary file 1 [file microorganisms-09-01313-s001.zip › Wolbachia_Table_S1.xlsx]

## Sheet: TableS1
Table S1. Statistical outputs of all genera present in Wolbachia-free ("W–") and infected ("W+") lines. Grey color corresponds to the Wolbachia genus while bold writing corresponds to genera significantly influenced by the presence or absence of Wolbachia.
.: P < 0.1, *: P < 0.05, **: P < 0.01, ***: P < 0.001
Taxonomy					Mean relative abundance (‰) ± se				Frequency				Statistics
Phylum	Class	Order	Family	Genus	W– ♀	W– ♂	W+ ♀	W+ ♂	W– ♀	W– ♂	W+ ♀	W+ ♂	Treatment	Sex	Treatment_Sex
Bacteroidetes	Bacteroidia	Chitinophagales	Chitinophagaceae	Chitinophaga	0.36 ± 0.36	0 ± 0	0 ± 0	0 ± 0	1/11	0/11	0/11	0/10	Chisq=1.43; df=1; P=0.305	Chisq=1.43; df=1; P=0.407	Chisq=0; df=1; P=1
Bacteroidetes	Bacteroidia	Chitinophagales	Chitinophagaceae	Niabella	1.36 ± 0.97	0.36 ± 0.36	0 ± 0	0 ± 0	2/11	1/11	0/11	0/10	Chisq=4.31; df=1; P=0.097.	Chisq=0.39; df=1; P=0.727	Chisq=0; df=1; P=1
Bacteroidetes	Bacteroidia	Chitinophagales	Chitinophagaceae	Sediminibacterium	0.09 ± 0.09	0 ± 0	0 ± 0	0.2 ± 0.2	1/11	0/11	0/11	1/10	Chisq=0; df=1; P=0.972	Chisq=0; df=1; P=1	Chisq=2.97; df=1; P=0.841
Bacteroidetes	Bacteroidia	Chitinophagales	Chitinophagaceae	Taibaiella	7.45 ± 4.49	8.09 ± 7.51	0 ± 0	0.5 ± 0.5	6/11	2/11	0/11	1/10	Chisq=7.59; df=1; P=0.024*	Chisq=1.47; df=1; P=0.407	Chisq=3.32; df=1; P=0.841
Bacteroidetes	Bacteroidia	Chitinophagales	Chitinophagaceae	Terrimonas	0.18 ± 0.18	0 ± 0	0 ± 0	0 ± 0	1/11	0/11	0/11	0/10	Chisq=1.43; df=1; P=0.305	Chisq=1.43; df=1; P=0.407	Chisq=0; df=1; P=1
Bacteroidetes	Bacteroidia	Chitinophagales	Chitinophagaceae	Vibrionimonas	0.64 ± 0.28	4.18 ± 1.24	0.27 ± 0.27	1.7 ± 1.05	4/11	8/11	1/11	6/10	Chisq=2.24; df=1; P=0.267	Chisq=8.97; df=1; P=0.089.	Chisq=0.6; df=1; P=1
Bacteroidetes	Bacteroidia	Cytophagales	Cytophagaceae	Sporocytophaga	0 ± 0	0 ± 0	0.45 ± 0.31	0.1 ± 0.1	0/11	0/11	2/11	1/10	Chisq=4.51; df=1; P=0.095.	Chisq=0.29; df=1; P=0.782	Chisq=0; df=1; P=1
Bacteroidetes	Bacteroidia	Cytophagales	Hymenobacteraceae	Pontibacter	0 ± 0	1 ± 1	0 ± 0	0 ± 0	0/11	1/11	0/11	0/10	Chisq=1.34; df=1; P=0.305	Chisq=1.43; df=1; P=0.407	Chisq=0; df=1; P=1
Bacteroidetes	Bacteroidia	Cytophagales	Spirosomaceae	Dyadobacter	1.09 ± 0.62	1.55 ± 0.93	0.18 ± 0.12	0.7 ± 0.3	5/11	3/11	2/11	4/10	Chisq=0.3; df=1; P=0.645	Chisq=0.01; df=1; P=1	Chisq=2.02; df=1; P=1
Bacteroidetes	Bacteroidia	Flavobacteriales	Crocinitomicaceae	Fluviicola	0 ± 0	0 ± 0	0.09 ± 0.09	0 ± 0	0/11	0/11	1/11	0/10	Chisq=1.43; df=1; P=0.305	Chisq=1.34; df=1; P=0.407	Chisq=0; df=1; P=1
Bacteroidetes	Bacteroidia	Flavobacteriales	Flavobacteriaceae	Flavobacterium	4.45 ± 1.65	6.73 ± 0.86	1.64 ± 0.94	2.9 ± 1.43	8/11	11/11	3/11	5/10	Chisq=12.09; df=1; P=0.006**	Chisq=3.98; df=1; P=0.341	Chisq=1.81; df=1; P=1
Bacteroidetes	Bacteroidia	Flavobacteriales	Weeksellaceae	Chryseobacterium	1.18 ± 0.99	2.73 ± 1.41	0.82 ± 0.82	4.8 ± 2.13	3/11	4/11	1/11	6/10	Chisq=0.03; df=1; P=0.933	Chisq=4.36; df=1; P=0.329	Chisq=2.43; df=1; P=0.963
Bacteroidetes	Bacteroidia	Flavobacteriales	Weeksellaceae	Moheibacter	1.55 ± 0.71	1.82 ± 0.83	0.18 ± 0.18	0.2 ± 0.2	4/11	5/11	1/11	1/10	Chisq=5.9; df=1; P=0.049*	Chisq=0.17; df=1; P=0.842	Chisq=0.02; df=1; P=1
Bacteroidetes	Bacteroidia	Sphingobacteriales	Sphingobacteriaceae	Arcticibacter	0.36 ± 0.28	0 ± 0	0.09 ± 0.09	0.6 ± 0.5	2/11	0/11	1/11	2/10	Chisq=0.27; df=1; P=0.652	Chisq=0.17; df=1; P=0.842	Chisq=3.32; df=1; P=0.841
Bacteroidetes	Bacteroidia	Sphingobacteriales	Sphingobacteriaceae	Parapedobacter	6.64 ± 2.26	10.45 ± 6.16	0.45 ± 0.37	0.9 ± 0.64	7/11	6/11	2/11	2/10	Chisq=7.54; df=1; P=0.024*	Chisq=0.08; df=1; P=0.953	Chisq=0.12; df=1; P=1
Bacteroidetes	Bacteroidia	Sphingobacteriales	Sphingobacteriaceae	Pedobacter	4.27 ± 1.4	3.45 ± 1.66	0 ± 0	0.3 ± 0.21	7/11	6/11	0/11	2/10	Chisq=12.62; df=1; P=0***	Chisq=0.17; df=1; P=0.842	Chisq=3.22; df=1; P=0.841
Bacteroidetes	Bacteroidia	Sphingobacteriales	Sphingobacteriaceae	Sphingobacterium	27.27 ± 7.2	44.09 ± 19.71	3.73 ± 2.37	34.9 ± 21.56	10/11	11/11	6/11	8/10	Chisq=6.61; df=1; P=0.036*	Chisq=2.49; df=1; P=0.407	Chisq=0.51; df=1; P=1
Firmicutes	Bacilli	Bacillales	Bacillaceae	Bacillus	0 ± 0	0.27 ± 0.19	0 ± 0	0.8 ± 0.7	0/11	2/11	0/11	2/10	Chisq=0.01; df=1; P=0.959	Chisq=6.17; df=1; P=0.165	Chisq=0; df=1; P=1
Firmicutes	Bacilli	Bacillales	Paenibacillaceae	Paenibacillus	0.45 ± 0.31	0.82 ± 0.72	0 ± 0	0 ± 0	2/11	2/11	0/11	0/10	Chisq=5.75; df=1; P=0.049*	Chisq=0; df=1; P=1	Chisq=0; df=1; P=1
Firmicutes	Bacilli	Bacillales	Planococcaceae	Lysinibacillus	0 ± 0	0 ± 0	0 ± 0	0.2 ± 0.2	0/11	0/11	0/11	1/10	Chisq=1.54; df=1; P=0.305	Chisq=1.54; df=1; P=0.407	Chisq=0; df=1; P=1
Firmicutes	Bacilli	Bacillales	Staphylococcaceae	Staphylococcus	132.91 ± 47.19	13.09 ± 11.04	0.91 ± 0.72	0 ± 0	11/11	5/11	3/11	0/10	Chisq=23.84; df=1; P=0***	Chisq=14.96; df=1; P=0***	Chisq=0; df=1; P=1
Firmicutes	Bacilli	Lactobacillales	Aerococcaceae	Facklamia	0.18 ± 0.18	0 ± 0	0 ± 0	0 ± 0	1/11	0/11	0/11	0/10	Chisq=1.43; df=1; P=0.305	Chisq=1.43; df=1; P=0.407	Chisq=0; df=1; P=1
Firmicutes	Bacilli	Lactobacillales	Leuconostocaceae	Leuconostoc	0 ± 0	0.18 ± 0.18	0 ± 0	0 ± 0	0/11	1/11	0/11	0/10	Chisq=1.34; df=1; P=0.305	Chisq=1.43; df=1; P=0.407	Chisq=0; df=1; P=1
Firmicutes	Bacilli	Lactobacillales	Streptococcaceae	Lactococcus	0.64 ± 0.36	0.27 ± 0.19	0.36 ± 0.36	0 ± 0	4/11	2/11	1/11	0/10	Chisq=4.66; df=1; P=0.089.	Chisq=1.69; df=1; P=0.407	Chisq=0.58; df=1; P=1
Firmicutes	Bacilli	Lactobacillales	Streptococcaceae	Streptococcus	0.18 ± 0.18	0 ± 0	0 ± 0	0 ± 0	1/11	0/11	0/11	0/10	Chisq=1.43; df=1; P=0.305	Chisq=1.43; df=1; P=0.407	Chisq=0; df=1; P=1
Firmicutes	Clostridia	Clostridiales	Lachnospiraceae	Anaerocolumna	0 ± 0	0.27 ± 0.27	0.09 ± 0.09	0 ± 0	0/11	1/11	1/11	0/10	Chisq=0; df=1; P=0.972	Chisq=0; df=1; P=1	Chisq=2.77; df=1; P=0.854
Proteobacteria	Alphaproteobacteria	Acetobacterales	Acetobacteraceae	Roseomonas	0 ± 0	0.36 ± 0.36	0 ± 0	0 ± 0	0/11	1/11	0/11	0/10	Chisq=1.34; df=1; P=0.305	Chisq=1.43; df=1; P=0.407	Chisq=0; df=1; P=1
Proteobacteria	Alphaproteobacteria	Azospirillales	Azospirillaceae	Azospirillum	0 ± 0	0.36 ± 0.24	0 ± 0	0 ± 0	0/11	2/11	0/11	0/10	Chisq=2.78; df=1; P=0.199	Chisq=2.97; df=1; P=0.407	Chisq=0; df=1; P=1
Proteobacteria	Alphaproteobacteria	Caulobacterales	Caulobacteraceae	Brevundimonas	7.09 ± 3.38	4.73 ± 2.16	0 ± 0	2.8 ± 2.11	9/11	7/11	0/11	3/10	Chisq=16.01; df=1; P=0***	Chisq=0.19; df=1; P=0.842	Chisq=5.75; df=1; P=0.841
Proteobacteria	Alphaproteobacteria	Caulobacterales	Caulobacteraceae	Caulobacter	3.64 ± 1.74	7.18 ± 2.45	1.64 ± 1.35	2.8 ± 1.07	8/11	9/11	3/11	6/10	Chisq=5.57; df=1; P=0.053.	Chisq=2.21; df=1; P=0.407	Chisq=0.38; df=1; P=1
Proteobacteria	Alphaproteobacteria	Caulobacterales	Caulobacteraceae	Phenylobacterium	0.73 ± 0.19	1.55 ± 0.67	0.18 ± 0.18	0.5 ± 0.34	7/11	6/11	1/11	2/10	Chisq=9.76; df=1; P=0.012*	Chisq=0; df=1; P=1	Chisq=0.7; df=1; P=1
Proteobacteria	Alphaproteobacteria	Reyranellales	Reyranellaceae	Reyranella	0.18 ± 0.18	0 ± 0	0 ± 0	0 ± 0	1/11	0/11	0/11	0/10	Chisq=1.43; df=1; P=0.305	Chisq=1.43; df=1; P=0.407	Chisq=0; df=1; P=1
Proteobacteria	Alphaproteobacteria	Rhizobiales	Beijerinckiaceae	Bosea	0 ± 0	0.36 ± 0.24	0.27 ± 0.27	0 ± 0	0/11	2/11	1/11	0/10	Chisq=0.3; df=1; P=0.645	Chisq=0.4; df=1; P=0.727	Chisq=3.91; df=1; P=0.841
Proteobacteria	Alphaproteobacteria	Rhizobiales	Beijerinckiaceae	Camelimonas	0.09 ± 0.09	0 ± 0	0 ± 0	0.5 ± 0.34	1/11	0/11	0/11	2/10	Chisq=0.44; df=1; P=0.586	Chisq=0.44; df=1; P=0.727	Chisq=4.19; df=1; P=0.841
Proteobacteria	Alphaproteobacteria	Rhizobiales	Beijerinckiaceae	Methylobacterium	0 ± 0	0.18 ± 0.18	0 ± 0	0 ± 0	0/11	1/11	0/11	0/10	Chisq=1.34; df=1; P=0.305	Chisq=1.43; df=1; P=0.407	Chisq=0; df=1; P=1
Proteobacteria	Alphaproteobacteria	Rhizobiales	Devosiaceae	Devosia	1.55 ± 0.62	2.82 ± 1.01	0 ± 0	1.1 ± 1.1	7/11	6/11	0/11	1/10	Chisq=16.45; df=1; P=0***	Chisq=0; df=1; P=1	Chisq=1.73; df=1; P=1
Proteobacteria	Alphaproteobacteria	Rhizobiales	Devosiaceae	Pelagibacterium	0 ± 0	0 ± 0	0 ± 0	0.4 ± 0.4	0/11	0/11	0/11	1/10	Chisq=1.54; df=1; P=0.305	Chisq=1.54; df=1; P=0.407	Chisq=0; df=1; P=1
Proteobacteria	Alphaproteobacteria	Rhizobiales	Kaistiaceae	Kaistia	0.45 ± 0.45	1.45 ± 1.27	0 ± 0	1.7 ± 1.7	1/11	2/11	0/11	1/10	Chisq=1.02; df=1; P=0.369	Chisq=1.23; df=1; P=0.424	Chisq=0.7; df=1; P=1
Proteobacteria	Alphaproteobacteria	Rhizobiales	Rhizobiaceae	Allorhizobium-Neorhizobium-Pararhizobium-Rhizobium	10.55 ± 2.85	15.73 ± 2.57	2.09 ± 1.7	8.1 ± 4.44	10/11	11/11	4/11	6/10	Chisq=14.08; df=1; P=0***	Chisq=1.99; df=1; P=0.407	Chisq=0.63; df=1; P=1
Proteobacteria	Alphaproteobacteria	Rhizobiales	Rhizobiaceae	Aminobacter	0.27 ± 0.27	0.27 ± 0.27	0 ± 0	1.2 ± 1.2	1/11	1/11	0/11	1/10	Chisq=0.3; df=1; P=0.645	Chisq=0.4; df=1; P=0.727	Chisq=1.14; df=1; P=1
Proteobacteria	Alphaproteobacteria	Rhizobiales	Rhizobiaceae	Aquamicrobium	0.27 ± 0.14	1.09 ± 0.91	0 ± 0	1.4 ± 1.4	3/11	2/11	0/11	1/10	Chisq=3.13; df=1; P=0.18	Chisq=0; df=1; P=1	Chisq=1.8; df=1; P=1
Proteobacteria	Alphaproteobacteria	Rhizobiales	Rhizobiaceae	Aureimonas	0 ± 0	0 ± 0	0 ± 0	1 ± 1	0/11	0/11	0/11	1/10	Chisq=1.54; df=1; P=0.305	Chisq=1.54; df=1; P=0.407	Chisq=0; df=1; P=1
Proteobacteria	Alphaproteobacteria	Rhizobiales	Rhizobiaceae	Ciceribacter	0 ± 0	0 ± 0	0 ± 0	0.2 ± 0.2	0/11	0/11	0/11	1/10	Chisq=1.54; df=1; P=0.305	Chisq=1.54; df=1; P=0.407	Chisq=0; df=1; P=1
Proteobacteria	Alphaproteobacteria	Rhizobiales	Rhizobiaceae	Falsochrobactrum	1.55 ± 0.65	2.18 ± 1.26	0.55 ± 0.45	9.1 ± 6.36	7/11	5/11	2/11	3/10	Chisq=4.37; df=1; P=0.097.	Chisq=0.06; df=1; P=0.965	Chisq=1.08; df=1; P=1
Proteobacteria	Alphaproteobacteria	Rhizobiales	Rhizobiaceae	Nitratireductor	0 ± 0	0 ± 0	0 ± 0	0.4 ± 0.4	0/11	0/11	0/11	1/10	Chisq=1.54; df=1; P=0.305	Chisq=1.54; df=1; P=0.407	Chisq=0; df=1; P=1
Proteobacteria	Alphaproteobacteria	Rhizobiales	Rhizobiaceae	Ochrobactrum	0 ± 0	0 ± 0	0 ± 0	0.7 ± 0.7	0/11	0/11	0/11	1/10	Chisq=1.54; df=1; P=0.305	Chisq=1.54; df=1; P=0.407	Chisq=0; df=1; P=1
Proteobacteria	Alphaproteobacteria	Rhizobiales	Rhizobiaceae	Paenochrobactrum	0 ± 0	0 ± 0	0 ± 0	3.8 ± 2.24	0/11	0/11	0/11	4/10	Chisq=6.99; df=1; P=0.03*	Chisq=6.99; df=1; P=0.119	Chisq=0; df=1; P=1
Proteobacteria	Alphaproteobacteria	Rhizobiales	Rhizobiaceae	Pseudochrobactrum	0.18 ± 0.18	0 ± 0	0 ± 0	0.6 ± 0.6	1/11	0/11	0/11	1/10	Chisq=0; df=1; P=0.972	Chisq=0; df=1; P=1	Chisq=2.97; df=1; P=0.841
Proteobacteria	Alphaproteobacteria	Rhizobiales	Rhizobiaceae	Shinella	0.45 ± 0.25	0.64 ± 0.43	0 ± 0	0 ± 0	3/11	2/11	0/11	0/10	Chisq=7.41; df=1; P=0.024*	Chisq=0.26; df=1; P=0.798	Chisq=0; df=1; P=1
Proteobacteria	Alphaproteobacteria	Rhizobiales	Xanthobacteraceae	Bradyrhizobium	0.55 ± 0.31	1.64 ± 0.56	0 ± 0	0.2 ± 0.2	3/11	7/11	0/11	1/10	Chisq=11.2; df=1; P=0.006**	Chisq=4.12; df=1; P=0.34	Chisq=0.43; df=1; P=1
Proteobacteria	Alphaproteobacteria	Rhodobacterales	Rhodobacteraceae	Defluviimonas	1.18 ± 0.57	2.36 ± 1.11	0.82 ± 0.58	3.4 ± 1.92	4/11	7/11	2/11	3/10	Chisq=3.24; df=1; P=0.173	Chisq=1.95; df=1; P=0.407	Chisq=0.11; df=1; P=1
Proteobacteria	Alphaproteobacteria	Rhodobacterales	Rhodobacteraceae	Gemmobacter	0 ± 0	0 ± 0	0 ± 0	0.4 ± 0.4	0/11	0/11	0/11	1/10	Chisq=1.54; df=1; P=0.305	Chisq=1.54; df=1; P=0.407	Chisq=0; df=1; P=1
Proteobacteria	Alphaproteobacteria	Rhodobacterales	Rhodobacteraceae	Ketogulonicigenium	0 ± 0	0.18 ± 0.18	0 ± 0	0.2 ± 0.2	0/11	1/11	0/11	1/10	Chisq=0; df=1; P=0.972	Chisq=2.97; df=1; P=0.407	Chisq=0; df=1; P=1
Proteobacteria	Alphaproteobacteria	Rhodobacterales	Rhodobacteraceae	Paracoccus	0 ± 0	0.18 ± 0.18	0 ± 0	0.3 ± 0.21	0/11	1/11	0/11	2/10	Chisq=0.52; df=1; P=0.554	Chisq=4.63; df=1; P=0.329	Chisq=0; df=1; P=1
Proteobacteria	Alphaproteobacteria	Rickettsiales	Anaplasmataceae	Wolbachia	0 ± 0	0 ± 0	875 ± 76.41	596.7 ± 130.96	0/11	0/11	11/11	10/10	Chisq=59.56; df=1; P=0***	Chisq=0; df=1; P=1	Chisq=0; df=1; P=1
Proteobacteria	Alphaproteobacteria	Sphingomonadales	Sphingomonadaceae	Novosphingobium	0.82 ± 0.38	2.18 ± 0.66	0 ± 0	3.8 ± 2.02	5/11	9/11	0/11	5/10	Chisq=8.72; df=1; P=0.017*	Chisq=10.3; df=1; P=0.044*	Chisq=2.14; df=1; P=1
Proteobacteria	Alphaproteobacteria	Sphingomonadales	Sphingomonadaceae	Sphingobium	0.09 ± 0.09	0.64 ± 0.54	0 ± 0	0 ± 0	1/11	2/11	0/11	0/10	Chisq=4.21; df=1; P=0.099.	Chisq=0.39; df=1; P=0.727	Chisq=0; df=1; P=1
Proteobacteria	Alphaproteobacteria	Sphingomonadales	Sphingomonadaceae	Sphingomonas	10.18 ± 3.21	19.82 ± 4.46	4.27 ± 3.68	27.2 ± 10.14	11/11	11/11	7/11	9/10	Chisq=7.98; df=1; P=0.024*	Chisq=2.13; df=1; P=0.407	Chisq=0; df=1; P=1
Proteobacteria	Alphaproteobacteria	Sphingomonadales	Sphingomonadaceae	Sphingopyxis	0.55 ± 0.31	0.82 ± 0.42	0 ± 0	0.2 ± 0.2	3/11	4/11	0/11	1/10	Chisq=5.75; df=1; P=0.049*	Chisq=0.74; df=1; P=0.588	Chisq=1.01; df=1; P=1
Proteobacteria	Deltaproteobacteria	Bdellovibrionales	Bacteriovoracaceae	Bacteriovorax	0 ± 0	0.64 ± 0.64	0 ± 0	0 ± 0	0/11	1/11	0/11	0/10	Chisq=1.34; df=1; P=0.305	Chisq=1.43; df=1; P=0.407	Chisq=0; df=1; P=1
Proteobacteria	Deltaproteobacteria	Bdellovibrionales	Bacteriovoracaceae	Peredibacter	0.09 ± 0.09	0.18 ± 0.18	0.27 ± 0.27	0.5 ± 0.34	1/11	1/11	1/11	2/10	Chisq=0.3; df=1; P=0.645	Chisq=0.3; df=1; P=0.782	Chisq=0.22; df=1; P=1
Proteobacteria	Gammaproteobacteria	Betaproteobacteriales	Burkholderiaceae	Comamonas	0 ± 0	0 ± 0	0.09 ± 0.09	0.2 ± 0.2	0/11	0/11	1/11	1/10	Chisq=2.97; df=1; P=0.185	Chisq=0; df=1; P=1	Chisq=0; df=1; P=1
Proteobacteria	Gammaproteobacteria	Betaproteobacteriales	Burkholderiaceae	Delftia	1 ± 0.63	0.55 ± 0.21	0.27 ± 0.27	1.7 ± 1.11	4/11	5/11	1/11	3/10	Chisq=2.47; df=1; P=0.235	Chisq=1.2; df=1; P=0.428	Chisq=0.52; df=1; P=1
Proteobacteria	Gammaproteobacteria	Betaproteobacteriales	Burkholderiaceae	Hydrogenophaga	0 ± 0	0.18 ± 0.18	0 ± 0	0 ± 0	0/11	1/11	0/11	0/10	Chisq=1.34; df=1; P=0.305	Chisq=1.43; df=1; P=0.407	Chisq=0; df=1; P=1
Proteobacteria	Gammaproteobacteria	Betaproteobacteriales	Burkholderiaceae	Hylemonella	0 ± 0	0.18 ± 0.18	0 ± 0	0 ± 0	0/11	1/11	0/11	0/10	Chisq=1.34; df=1; P=0.305	Chisq=1.43; df=1; P=0.407	Chisq=0; df=1; P=1
Proteobacteria	Gammaproteobacteria	Betaproteobacteriales	Burkholderiaceae	Lampropedia	0.36 ± 0.36	0 ± 0	0 ± 0	0 ± 0	1/11	0/11	0/11	0/10	Chisq=1.43; df=1; P=0.305	Chisq=1.43; df=1; P=0.407	Chisq=0; df=1; P=1
Proteobacteria	Gammaproteobacteria	Betaproteobacteriales	Methylophilaceae	Methylotenera	0 ± 0	0.36 ± 0.28	0 ± 0	0 ± 0	0/11	2/11	0/11	0/10	Chisq=2.78; df=1; P=0.199	Chisq=2.97; df=1; P=0.407	Chisq=0; df=1; P=1
Proteobacteria	Gammaproteobacteria	Betaproteobacteriales	Methylophilaceae	MM2	0 ± 0	0 ± 0	0 ± 0	0.2 ± 0.2	0/11	0/11	0/11	1/10	Chisq=1.54; df=1; P=0.305	Chisq=1.54; df=1; P=0.407	Chisq=0; df=1; P=1
Proteobacteria	Gammaproteobacteria	Cellvibrionales	Cellvibrionaceae	Cellvibrio	9.09 ± 3	21.45 ± 8.87	0 ± 0	0 ± 0	11/11	11/11	0/11	0/10	Chisq=59.56; df=1; P=0***	Chisq=0; df=1; P=1	Chisq=0; df=1; P=1
Proteobacteria	Gammaproteobacteria	Enterobacteriales	Enterobacteriaceae	Enterobacter	0 ± 0	0 ± 0	0.09 ± 0.09	0.3 ± 0.3	0/11	0/11	1/11	1/10	Chisq=2.97; df=1; P=0.185	Chisq=0; df=1; P=1	Chisq=0; df=1; P=1
Proteobacteria	Gammaproteobacteria	Enterobacteriales	Enterobacteriaceae	Erwinia	610.27 ± 39.55	637.82 ± 50.16	0 ± 0	0 ± 0	11/11	11/11	0/11	0/10	Chisq=59.56; df=1; P=0***	Chisq=0; df=1; P=1	Chisq=0; df=1; P=1
Proteobacteria	Gammaproteobacteria	Enterobacteriales	Enterobacteriaceae	Escherichia/Shigella	2.73 ± 1.14	16.09 ± 6.4	4.73 ± 4.33	2.7 ± 1.18	6/11	8/11	4/11	6/10	Chisq=1.1; df=1; P=0.358	Chisq=1.96; df=1; P=0.407	Chisq=0.02; df=1; P=1
Proteobacteria	Gammaproteobacteria	Enterobacteriales	Enterobacteriaceae	Plesiomonas	0 ± 0	0 ± 0	0 ± 0	0.6 ± 0.6	0/11	0/11	0/11	1/10	Chisq=1.54; df=1; P=0.305	Chisq=1.54; df=1; P=0.407	Chisq=0; df=1; P=1
Proteobacteria	Gammaproteobacteria	Enterobacteriales	Enterobacteriaceae	Providencia	0 ± 0	0 ± 0	1.64 ± 0.66	4.6 ± 2.25	0/11	0/11	7/11	6/10	Chisq=24.77; df=1; P=0***	Chisq=0.03; df=1; P=1	Chisq=0; df=1; P=1
Proteobacteria	Gammaproteobacteria	Enterobacteriales	Enterobacteriaceae	Rahnella	26 ± 13.46	0.73 ± 0.3	29.27 ± 24.15	8.9 ± 5.2	10/11	5/11	7/11	7/10	Chisq=0.02; df=1; P=0.939	Chisq=2.01; df=1; P=0.407	Chisq=3.75; df=1; P=0.841
Proteobacteria	Gammaproteobacteria	Enterobacteriales	Enterobacteriaceae	Raoultella	0 ± 0	0 ± 0	0.18 ± 0.18	0 ± 0	0/11	0/11	1/11	0/10	Chisq=1.43; df=1; P=0.305	Chisq=1.34; df=1; P=0.407	Chisq=0; df=1; P=1
Proteobacteria	Gammaproteobacteria	Enterobacteriales	Enterobacteriaceae	Serratia	2.55 ± 1.3	0.18 ± 0.12	14.09 ± 4.67	12.4 ± 5.66	7/11	2/11	11/11	8/10	Chisq=14.51; df=1; P=0***	Chisq=7.56; df=1; P=0.119	Chisq=0.56; df=1; P=1
Proteobacteria	Gammaproteobacteria	Enterobacteriales	Enterobacteriaceae	Trabulsiella	10.55 ± 3.08	41.27 ± 10.17	4.09 ± 3.4	46.8 ± 22.15	11/11	11/11	7/11	9/10	Chisq=7.98; df=1; P=0.024*	Chisq=2.13; df=1; P=0.407	Chisq=0; df=1; P=1
Proteobacteria	Gammaproteobacteria	Gammaproteobacteria_Incertae_Sedis	Unknown_Family	Acidibacter	0 ± 0	0.18 ± 0.18	0 ± 0	0 ± 0	0/11	1/11	0/11	0/10	Chisq=1.34; df=1; P=0.305	Chisq=1.43; df=1; P=0.407	Chisq=0; df=1; P=1
Proteobacteria	Gammaproteobacteria	Oceanospirillales	Alcanivoracaceae	Alcanivorax	0.73 ± 0.56	0 ± 0	0 ± 0	0 ± 0	2/11	0/11	0/11	0/10	Chisq=2.97; df=1; P=0.185	Chisq=2.97; df=1; P=0.407	Chisq=0; df=1; P=1
Proteobacteria	Gammaproteobacteria	Pseudomonadales	Moraxellaceae	Acinetobacter	8.82 ± 2.67	34.18 ± 17.73	2.27 ± 1.79	19.9 ± 9.08	11/11	11/11	4/11	9/10	Chisq=14.64; df=1; P=0***	Chisq=6.99; df=1; P=0.119	Chisq=0; df=1; P=1
Proteobacteria	Gammaproteobacteria	Pseudomonadales	Moraxellaceae	Alkanindiges	11.82 ± 3.99	22.36 ± 6.11	1.64 ± 1.44	3.4 ± 1.63	11/11	11/11	3/11	5/10	Chisq=25.14; df=1; P=0***	Chisq=1.16; df=1; P=0.433	Chisq=0; df=1; P=1
Proteobacteria	Gammaproteobacteria	Pseudomonadales	Pseudomonadaceae	Pseudomonas	43.45 ± 21.65	23.64 ± 6.9	28.18 ± 11.59	117.4 ± 46.48	11/11	11/11	10/11	10/10	Chisq=1.43; df=1; P=0.305	Chisq=1.34; df=1; P=0.407	Chisq=0; df=1; P=1
Proteobacteria	Gammaproteobacteria	Steroidobacterales	Steroidobacteraceae	Steroidobacter	0 ± 0	0.36 ± 0.36	0 ± 0	0 ± 0	0/11	1/11	0/11	0/10	Chisq=1.34; df=1; P=0.305	Chisq=1.43; df=1; P=0.407	Chisq=0; df=1; P=1
Proteobacteria	Gammaproteobacteria	Xanthomonadales	Xanthomonadaceae	Luteimonas	0.09 ± 0.09	0.45 ± 0.31	0 ± 0	10.9 ± 10.9	1/11	2/11	0/11	1/10	Chisq=1.02; df=1; P=0.369	Chisq=1.23; df=1; P=0.424	Chisq=0.7; df=1; P=1
Proteobacteria	Gammaproteobacteria	Xanthomonadales	Xanthomonadaceae	Pseudoxanthomonas	2 ± 1.9	0.55 ± 0.45	0 ± 0	0 ± 0	2/11	2/11	0/11	0/10	Chisq=5.75; df=1; P=0.049*	Chisq=0; df=1; P=1	Chisq=0; df=1; P=1
Proteobacteria	Gammaproteobacteria	Xanthomonadales	Xanthomonadaceae	Stenotrophomonas	5.55 ± 2.12	8.27 ± 4.58	0.73 ± 0.54	3.5 ± 1.89	9/11	9/11	3/11	6/10	Chisq=7.31; df=1; P=0.027*	Chisq=1.41; df=1; P=0.407	Chisq=0.92; df=1; P=1
Proteobacteria	Gammaproteobacteria	Xanthomonadales	Xanthomonadaceae	Thermomonas	0.64 ± 0.43	2 ± 0.81	0 ± 0	1 ± 1	2/11	6/11	0/11	1/10	Chisq=7.67; df=1; P=0.024*	Chisq=4.42; df=1; P=0.329	Chisq=0.37; df=1; P=1
Verrucomicrobia	Verrucomicrobiae	Verrucomicrobiales	Verrucomicrobiaceae	Verrucomicrobium	1 ± 0.9	0.73 ± 0.73	0 ± 0	0 ± 0	2/11	1/11	0/11	0/10	Chisq=4.31; df=1; P=0.097.	Chisq=0.39; df=1; P=0.727	Chisq=0; df=1; P=1
