# Supplementary material for: Influential Insider: Wolbachia, an Intracellular Symbiont, Manipulates Bacterial Diversity in Its Insect Host
Source: Microorganisms. 2021 Jun 16;9(6):1313. doi: 10.3390/microorganisms9061313 (PMC8234596; doi:10.3390/microorganisms9061313)
Supplement: Supplementary file 1 [file microorganisms-09-01313-s001.zip › Wolbachia_Table_S2.xlsx]

## Sheet: Table S2
Table S2. ASV information for Wolbachia-free ("W–") and infected ("W+") flies. Grey color corresponds to ASVs associated to the Wolbachia genus.
Taxonomy						Mean relative abundance (‰) ± se				Frequency
ASV	Phylum	Class	Order	Family	Genus	W– ♀	W– ♂	W+ ♀	W+ ♂	W– ♀	W– ♂	W+ ♀	W+ ♂
ASV 1	Proteobacteria	Gammaproteobacteria	Enterobacteriales	Enterobacteriaceae	Serratia	1 ± 0.66	0.18 ± 0.12	0.36 ± 0.24	1.2 ± 0.59	3/11	2/11	2/11	4/10
ASV 2	Proteobacteria	Gammaproteobacteria	Enterobacteriales	Enterobacteriaceae	Serratia	0.64 ± 0.54	0 ± 0	0.27 ± 0.19	1.4 ± 0.75	2/11	0/11	2/11	4/10
ASV 3	Proteobacteria	Gammaproteobacteria	Enterobacteriales	Enterobacteriaceae	NA	0.45 ± 0.31	0 ± 0	1.18 ± 1.09	0 ± 0	2/11	0/11	2/11	0/10
ASV 4	Proteobacteria	Gammaproteobacteria	Enterobacteriales	Enterobacteriaceae	Serratia	0.45 ± 0.31	0 ± 0	1.55 ± 1.36	0 ± 0	2/11	0/11	2/11	0/10
ASV 9	Proteobacteria	Gammaproteobacteria	Pseudomonadales	Pseudomonadaceae	Pseudomonas	0.55 ± 0.55	0.91 ± 0.81	0.09 ± 0.09	3.9 ± 3.47	1/11	2/11	1/11	3/10
ASV 11	Proteobacteria	Gammaproteobacteria	Pseudomonadales	Pseudomonadaceae	Pseudomonas	0.09 ± 0.09	0.73 ± 0.73	0.64 ± 0.54	0.1 ± 0.1	1/11	1/11	2/11	1/10
ASV 14	Proteobacteria	Gammaproteobacteria	Pseudomonadales	Pseudomonadaceae	Pseudomonas	0.18 ± 0.12	0.64 ± 0.64	0.36 ± 0.36	0 ± 0	2/11	1/11	1/11	0/10
ASV 15	Proteobacteria	Alphaproteobacteria	Rickettsiales	Anaplasmataceae	Wolbachia	0 ± 0	0 ± 0	269.45 ± 78.04	147.9 ± 62.97	0/11	0/11	6/11	6/10
ASV 16	Proteobacteria	Gammaproteobacteria	Pseudomonadales	Pseudomonadaceae	Pseudomonas	0.36 ± 0.36	0.64 ± 0.64	0 ± 0	3.8 ± 3.8	1/11	1/11	0/11	1/10
ASV 17	Proteobacteria	Alphaproteobacteria	Rickettsiales	Anaplasmataceae	Wolbachia	0 ± 0	0 ± 0	240.55 ± 69.71	135.8 ± 57.83	0/11	0/11	6/11	6/10
ASV 20	Proteobacteria	Alphaproteobacteria	Rickettsiales	Anaplasmataceae	Wolbachia	0 ± 0	0 ± 0	191.45 ± 76.77	166.5 ± 79.41	0/11	0/11	5/11	4/10
ASV 23	Proteobacteria	Alphaproteobacteria	Rickettsiales	Anaplasmataceae	Wolbachia	0 ± 0	0 ± 0	170.64 ± 68.09	142.2 ± 67.8	0/11	0/11	5/11	4/10
ASV 29	Proteobacteria	Gammaproteobacteria	Enterobacteriales	Enterobacteriaceae	NA	0.18 ± 0.18	0 ± 0	0 ± 0	0.3 ± 0.21	1/11	0/11	0/11	2/10
ASV 33	Proteobacteria	Gammaproteobacteria	Enterobacteriales	Enterobacteriaceae	Serratia	0.18 ± 0.18	0 ± 0	0 ± 0	0.2 ± 0.2	1/11	0/11	0/11	1/10
ASV 36	Proteobacteria	Gammaproteobacteria	Enterobacteriales	Enterobacteriaceae	NA	0.09 ± 0.09	0 ± 0	0.09 ± 0.09	0 ± 0	1/11	0/11	1/11	0/10
ASV 37	Proteobacteria	Gammaproteobacteria	Enterobacteriales	Enterobacteriaceae	Erwinia	82.91 ± 24.72	70.82 ± 25.09	0 ± 0	0 ± 0	6/11	5/11	0/11	0/10
ASV 40	Proteobacteria	Gammaproteobacteria	Pseudomonadales	Moraxellaceae	Acinetobacter	2.64 ± 1.35	14.55 ± 10.08	0.18 ± 0.12	8.7 ± 4.45	4/11	6/11	2/11	5/10
ASV 41	Proteobacteria	Gammaproteobacteria	Enterobacteriales	Enterobacteriaceae	NA	0 ± 0	0 ± 0	0.18 ± 0.12	0 ± 0	0/11	0/11	2/11	0/10
ASV 42	Proteobacteria	Gammaproteobacteria	Enterobacteriales	Enterobacteriaceae	Erwinia	79.73 ± 23.58	65.55 ± 23.81	0 ± 0	0 ± 0	6/11	5/11	0/11	0/10
ASV 43	Proteobacteria	Gammaproteobacteria	Enterobacteriales	Enterobacteriaceae	Erwinia	75.36 ± 22.57	68 ± 24.29	0 ± 0	0 ± 0	6/11	5/11	0/11	0/10
ASV 46	Proteobacteria	Gammaproteobacteria	Enterobacteriales	Enterobacteriaceae	Erwinia	60.36 ± 21.75	78.36 ± 24.69	0 ± 0	0 ± 0	5/11	6/11	0/11	0/10
ASV 48	Proteobacteria	Gammaproteobacteria	Pseudomonadales	Moraxellaceae	Acinetobacter	1.09 ± 0.46	2.09 ± 1.02	0.82 ± 0.82	0.4 ± 0.22	6/11	5/11	1/11	3/10
ASV 51	Proteobacteria	Gammaproteobacteria	Enterobacteriales	Enterobacteriaceae	Erwinia	71.91 ± 21.02	61.91 ± 22.44	0 ± 0	0 ± 0	6/11	5/11	0/11	0/10
ASV 52	Proteobacteria	Gammaproteobacteria	Enterobacteriales	Enterobacteriaceae	Erwinia	57.64 ± 20.84	72.73 ± 22.42	0 ± 0	0 ± 0	5/11	6/11	0/11	0/10
ASV 54	Proteobacteria	Gammaproteobacteria	Enterobacteriales	Enterobacteriaceae	Erwinia	55.18 ± 20.39	72.45 ± 22.56	0 ± 0	0 ± 0	5/11	6/11	0/11	0/10
ASV 55	Proteobacteria	Gammaproteobacteria	Pseudomonadales	Moraxellaceae	Acinetobacter	2.73 ± 1.53	12.18 ± 8.11	0 ± 0	9 ± 4.58	5/11	6/11	0/11	6/10
ASV 56	Proteobacteria	Gammaproteobacteria	Pseudomonadales	Moraxellaceae	Acinetobacter	1.36 ± 0.47	1.64 ± 0.85	1 ± 0.75	0.1 ± 0.1	6/11	4/11	2/11	1/10
ASV 58	Proteobacteria	Gammaproteobacteria	Enterobacteriales	Enterobacteriaceae	Erwinia	51.27 ± 18.86	65.64 ± 20.04	0 ± 0	0 ± 0	5/11	6/11	0/11	0/10
ASV 63	Proteobacteria	Gammaproteobacteria	Pseudomonadales	Pseudomonadaceae	Pseudomonas	1.45 ± 1.45	0.64 ± 0.54	0.18 ± 0.12	4.4 ± 4.08	1/11	2/11	2/11	2/10
ASV 65	Proteobacteria	Gammaproteobacteria	Enterobacteriales	Enterobacteriaceae	Trabulsiella	4.09 ± 1.89	14.64 ± 6.49	0.36 ± 0.2	23.4 ± 11.95	5/11	6/11	3/11	5/10
ASV 67	Proteobacteria	Gammaproteobacteria	Enterobacteriales	Enterobacteriaceae	Trabulsiella	2.82 ± 1.17	13.91 ± 5.68	3.55 ± 3.45	1.8 ± 1.48	6/11	5/11	2/11	3/10
ASV 69	Proteobacteria	Gammaproteobacteria	Pseudomonadales	Pseudomonadaceae	Pseudomonas	1 ± 1	0.64 ± 0.45	0.18 ± 0.12	3.9 ± 3.68	1/11	3/11	2/11	3/10
ASV 71	Proteobacteria	Gammaproteobacteria	Enterobacteriales	Enterobacteriaceae	Trabulsiella	3.64 ± 1.64	12.73 ± 5.66	0.18 ± 0.12	21.6 ± 10.58	5/11	6/11	2/11	6/10
ASV 73	Proteobacteria	Gammaproteobacteria	Enterobacteriales	Enterobacteriaceae	Escherichia/Shigella	2.45 ± 0.93	13.09 ± 5.36	4.27 ± 3.88	1.2 ± 0.81	6/11	5/11	4/11	3/10
ASV 74	Proteobacteria	Gammaproteobacteria	Xanthomonadales	Xanthomonadaceae	Stenotrophomonas	0.55 ± 0.21	2.09 ± 1.15	0.36 ± 0.36	0.2 ± 0.2	5/11	4/11	1/11	1/10
ASV 77	Proteobacteria	Gammaproteobacteria	Xanthomonadales	Xanthomonadaceae	Stenotrophomonas	0.18 ± 0.12	1.55 ± 0.91	0.27 ± 0.19	0 ± 0	2/11	3/11	2/11	0/10
ASV 92	Proteobacteria	Gammaproteobacteria	Pseudomonadales	Moraxellaceae	Acinetobacter	0.18 ± 0.18	0.45 ± 0.45	0.09 ± 0.09	0.4 ± 0.4	1/11	1/11	1/11	1/10
ASV 94	Proteobacteria	Gammaproteobacteria	Enterobacteriales	Enterobacteriaceae	Providencia	0 ± 0	0 ± 0	0.27 ± 0.19	2.1 ± 1.16	0/11	0/11	2/11	3/10
ASV 99	Proteobacteria	Gammaproteobacteria	Pseudomonadales	Pseudomonadaceae	Pseudomonas	0 ± 0	0 ± 0	0.18 ± 0.18	0.1 ± 0.1	0/11	0/11	1/11	1/10
ASV 104	Proteobacteria	Gammaproteobacteria	Pseudomonadales	Moraxellaceae	Acinetobacter	0.09 ± 0.09	0.18 ± 0.18	0.18 ± 0.18	0.3 ± 0.3	1/11	1/11	1/11	1/10
ASV 105	Proteobacteria	Gammaproteobacteria	Pseudomonadales	Pseudomonadaceae	Pseudomonas	0.09 ± 0.09	0 ± 0	0.09 ± 0.09	3 ± 2.02	1/11	0/11	1/11	3/10
ASV 108	Proteobacteria	Gammaproteobacteria	Enterobacteriales	Enterobacteriaceae	Providencia	0 ± 0	0 ± 0	0.18 ± 0.12	2.2 ± 1.14	0/11	0/11	2/11	4/10
ASV 109	Bacteroidetes	Bacteroidia	Sphingobacteriales	Sphingobacteriaceae	Sphingobacterium	0 ± 0	0.09 ± 0.09	0.09 ± 0.09	0 ± 0	0/11	1/11	1/11	0/10
ASV 110	Proteobacteria	Gammaproteobacteria	Betaproteobacteriales	Burkholderiaceae	Comamonas	0 ± 0	0 ± 0	0.09 ± 0.09	0 ± 0	0/11	0/11	1/11	0/10
ASV 111	Proteobacteria	Gammaproteobacteria	Xanthomonadales	Xanthomonadaceae	Stenotrophomonas	1.55 ± 0.85	0.09 ± 0.09	0.09 ± 0.09	1.8 ± 1.18	3/11	1/11	1/11	3/10
ASV 112	Proteobacteria	Gammaproteobacteria	Enterobacteriales	Enterobacteriaceae	Providencia	0 ± 0	0 ± 0	0.09 ± 0.09	0 ± 0	0/11	0/11	1/11	0/10
ASV 113	Proteobacteria	Gammaproteobacteria	Pseudomonadales	Pseudomonadaceae	Pseudomonas	0 ± 0	0 ± 0	0.18 ± 0.18	0 ± 0	0/11	0/11	1/11	0/10
ASV 114	Proteobacteria	Alphaproteobacteria	Rhizobiales	Rhizobiaceae	Falsochrobactrum	0.73 ± 0.36	0.45 ± 0.31	0.09 ± 0.09	1.4 ± 0.95	4/11	2/11	1/11	2/10
ASV 119	Proteobacteria	Gammaproteobacteria	Enterobacteriales	Enterobacteriaceae	Rahnella	8.45 ± 6.32	0.09 ± 0.09	13.18 ± 12.3	0.1 ± 0.1	5/11	1/11	3/11	1/10
ASV 122	Proteobacteria	Gammaproteobacteria	Pseudomonadales	Pseudomonadaceae	Pseudomonas	0 ± 0	0 ± 0	0.18 ± 0.18	2.7 ± 1.68	0/11	0/11	1/11	4/10
ASV 123	Proteobacteria	Gammaproteobacteria	Enterobacteriales	Enterobacteriaceae	Rahnella	5.45 ± 4.69	0.18 ± 0.18	1.82 ± 0.96	4.8 ± 2.83	4/11	1/11	4/11	5/10
ASV 125	Proteobacteria	Alphaproteobacteria	Rhizobiales	Rhizobiaceae	Falsochrobactrum	0.18 ± 0.18	0.27 ± 0.27	0.18 ± 0.18	2.3 ± 2.3	1/11	1/11	1/11	1/10
ASV 126	Proteobacteria	Gammaproteobacteria	Enterobacteriales	Enterobacteriaceae	Providencia	0 ± 0	0 ± 0	0.09 ± 0.09	0 ± 0	0/11	0/11	1/11	0/10
ASV 127	Bacteroidetes	Bacteroidia	Sphingobacteriales	Sphingobacteriaceae	Sphingobacterium	0 ± 0	0.09 ± 0.09	0.18 ± 0.12	0 ± 0	0/11	1/11	2/11	0/10
ASV 130	Proteobacteria	Gammaproteobacteria	Betaproteobacteriales	Burkholderiaceae	Comamonas	0 ± 0	0 ± 0	0 ± 0	0.2 ± 0.2	0/11	0/11	0/11	1/10
ASV 131	Proteobacteria	Gammaproteobacteria	Enterobacteriales	Enterobacteriaceae	Rahnella	7.27 ± 5.19	0.27 ± 0.19	12.73 ± 12.13	0.1 ± 0.1	5/11	2/11	3/11	1/10
ASV 133	Proteobacteria	Gammaproteobacteria	Xanthomonadales	Xanthomonadaceae	Stenotrophomonas	2 ± 1	0.09 ± 0.09	0 ± 0	1.5 ± 0.78	4/11	1/11	0/11	4/10
ASV 136	Proteobacteria	Gammaproteobacteria	Enterobacteriales	Enterobacteriaceae	Erwinia	21.27 ± 6.37	22.45 ± 8.31	0 ± 0	0 ± 0	6/11	5/11	0/11	0/10
ASV 137	Proteobacteria	Gammaproteobacteria	Pseudomonadales	Pseudomonadaceae	Pseudomonas	0 ± 0	0.09 ± 0.09	0 ± 0	0 ± 0	0/11	1/11	0/11	0/10
ASV 139	Bacteroidetes	Bacteroidia	Sphingobacteriales	Sphingobacteriaceae	Sphingobacterium	0.27 ± 0.14	0.09 ± 0.09	0.09 ± 0.09	0.6 ± 0.5	3/11	1/11	1/11	2/10
ASV 140	Proteobacteria	Alphaproteobacteria	Rhizobiales	Rhizobiaceae	Falsochrobactrum	0 ± 0	0.18 ± 0.18	0.27 ± 0.27	1.9 ± 1.9	0/11	1/11	1/11	1/10
ASV 141	Proteobacteria	Gammaproteobacteria	Enterobacteriales	Enterobacteriaceae	Rahnella	4.82 ± 4.33	0.18 ± 0.12	1.55 ± 1.02	3.9 ± 2.41	4/11	2/11	3/11	4/10
ASV 143	Proteobacteria	Gammaproteobacteria	Enterobacteriales	Enterobacteriaceae	Providencia	0 ± 0	0 ± 0	0.73 ± 0.38	0.1 ± 0.1	0/11	0/11	4/11	1/10
ASV 144	Proteobacteria	Gammaproteobacteria	Pseudomonadales	Pseudomonadaceae	Pseudomonas	7.82 ± 7.82	2.82 ± 2.28	0 ± 0	3.6 ± 2.88	1/11	2/11	0/11	3/10
ASV 146	Proteobacteria	Alphaproteobacteria	Rhizobiales	Rhizobiaceae	Falsochrobactrum	0.36 ± 0.36	0.27 ± 0.14	0 ± 0	1.1 ± 0.77	1/11	3/11	0/11	2/10
ASV 147	Proteobacteria	Gammaproteobacteria	Pseudomonadales	Pseudomonadaceae	Pseudomonas	0 ± 0	0 ± 0	0 ± 0	0.2 ± 0.2	0/11	0/11	0/11	1/10
ASV 149	Proteobacteria	Gammaproteobacteria	Enterobacteriales	Enterobacteriaceae	Erwinia	20 ± 6	19 ± 7.03	0 ± 0	0 ± 0	6/11	5/11	0/11	0/10
ASV 151	Proteobacteria	Gammaproteobacteria	Enterobacteriales	Enterobacteriaceae	Erwinia	18.82 ± 6.99	21 ± 7.37	0 ± 0	0 ± 0	5/11	6/11	0/11	0/10
ASV 153	Proteobacteria	Gammaproteobacteria	Enterobacteriales	Enterobacteriaceae	Providencia	0 ± 0	0 ± 0	0.27 ± 0.19	0.2 ± 0.2	0/11	0/11	2/11	1/10
ASV 155	Firmicutes	Bacilli	Bacillales	Staphylococcaceae	Staphylococcus	32.64 ± 13.33	4 ± 4	0.55 ± 0.45	0 ± 0	6/11	1/11	2/11	0/10
ASV 158	Proteobacteria	Gammaproteobacteria	Pseudomonadales	Pseudomonadaceae	Pseudomonas	6.36 ± 6.36	3 ± 2.46	0 ± 0	3.3 ± 2.39	1/11	2/11	0/11	3/10
ASV 159	Proteobacteria	Gammaproteobacteria	Enterobacteriales	Enterobacteriaceae	Serratia	0.09 ± 0.09	0 ± 0	3.45 ± 1.5	4.1 ± 2.13	1/11	0/11	5/11	4/10
ASV 161	Proteobacteria	Gammaproteobacteria	Enterobacteriales	Enterobacteriaceae	Erwinia	15.82 ± 6.16	19.91 ± 6.88	0 ± 0	0 ± 0	5/11	6/11	0/11	0/10
ASV 167	Firmicutes	Bacilli	Bacillales	Staphylococcaceae	Staphylococcus	30.27 ± 12.61	3.91 ± 3.91	0.27 ± 0.27	0 ± 0	6/11	1/11	1/11	0/10
ASV 168	Bacteroidetes	Bacteroidia	Sphingobacteriales	Sphingobacteriaceae	Sphingobacterium	0.09 ± 0.09	0.18 ± 0.12	0 ± 0	0.4 ± 0.4	1/11	2/11	0/11	1/10
ASV 170	Proteobacteria	Gammaproteobacteria	Enterobacteriales	Enterobacteriaceae	Serratia	0 ± 0	0 ± 0	1.73 ± 1.34	0.5 ± 0.31	0/11	0/11	4/11	3/10
ASV 172	Proteobacteria	Gammaproteobacteria	Enterobacteriales	Enterobacteriaceae	Serratia	0.18 ± 0.18	0 ± 0	3 ± 1.17	3.7 ± 2.09	1/11	0/11	6/11	4/10
ASV 176	Proteobacteria	Gammaproteobacteria	Pseudomonadales	Pseudomonadaceae	Pseudomonas	0.18 ± 0.18	0 ± 0	0 ± 0	0.4 ± 0.31	1/11	0/11	0/11	2/10
ASV 177	Proteobacteria	Gammaproteobacteria	Enterobacteriales	Enterobacteriaceae	Serratia	0 ± 0	0 ± 0	1.73 ± 1.34	0.1 ± 0.1	0/11	0/11	4/11	1/10
ASV 186	Proteobacteria	Gammaproteobacteria	Pseudomonadales	Pseudomonadaceae	Pseudomonas	0 ± 0	0 ± 0	0 ± 0	0.3 ± 0.21	0/11	0/11	0/11	2/10
ASV 189	Bacteroidetes	Bacteroidia	Sphingobacteriales	Sphingobacteriaceae	Sphingobacterium	0.64 ± 0.39	0.27 ± 0.27	0.27 ± 0.27	0.2 ± 0.2	3/11	1/11	1/11	1/10
ASV 194	Proteobacteria	Alphaproteobacteria	Rhizobiales	Rhizobiaceae	Pseudochrobactrum	0 ± 0	0 ± 0	0 ± 0	0.2 ± 0.2	0/11	0/11	0/11	1/10
ASV 201	Bacteroidetes	Bacteroidia	Flavobacteriales	Weeksellaceae	Chryseobacterium	0.27 ± 0.19	0.27 ± 0.19	0 ± 0	0.7 ± 0.52	2/11	2/11	0/11	2/10
ASV 202	Proteobacteria	Gammaproteobacteria	Pseudomonadales	Pseudomonadaceae	Pseudomonas	1.09 ± 0.61	0.36 ± 0.28	3.18 ± 2.15	19.2 ± 9.54	3/11	2/11	4/11	4/10
ASV 204	Proteobacteria	Gammaproteobacteria	Pseudomonadales	Pseudomonadaceae	Pseudomonas	0 ± 0	0 ± 0	0.09 ± 0.09	0.2 ± 0.13	0/11	0/11	1/11	2/10
ASV 206	Proteobacteria	Alphaproteobacteria	Rhizobiales	Rhizobiaceae	Pseudochrobactrum	0 ± 0	0 ± 0	0 ± 0	0.3 ± 0.3	0/11	0/11	0/11	1/10
ASV 210	Bacteroidetes	Bacteroidia	Sphingobacteriales	Sphingobacteriaceae	Sphingobacterium	0.36 ± 0.24	0.18 ± 0.18	0.18 ± 0.18	0.2 ± 0.2	2/11	1/11	1/11	1/10
ASV 211	Proteobacteria	Gammaproteobacteria	Pseudomonadales	Pseudomonadaceae	Pseudomonas	0.73 ± 0.51	0.36 ± 0.2	2.64 ± 1.71	17 ± 8.87	2/11	3/11	4/11	5/10
ASV 214	Proteobacteria	Gammaproteobacteria	Pseudomonadales	Pseudomonadaceae	Pseudomonas	0 ± 0	0 ± 0	0.18 ± 0.12	0 ± 0	0/11	0/11	2/11	0/10
ASV 216	Proteobacteria	Gammaproteobacteria	Pseudomonadales	Pseudomonadaceae	Pseudomonas	0.09 ± 0.09	0.64 ± 0.54	0.36 ± 0.36	0 ± 0	1/11	2/11	1/11	0/10
ASV 218	Firmicutes	Bacilli	Bacillales	Staphylococcaceae	Staphylococcus	17.73 ± 15.66	0.45 ± 0.31	0 ± 0	0 ± 0	5/11	2/11	0/11	0/10
ASV 219	Proteobacteria	Gammaproteobacteria	Pseudomonadales	Pseudomonadaceae	Pseudomonas	0 ± 0	0.18 ± 0.18	0 ± 0	0 ± 0	0/11	1/11	0/11	0/10
ASV 220	Proteobacteria	Gammaproteobacteria	Betaproteobacteriales	Burkholderiaceae	Delftia	0 ± 0	0.09 ± 0.09	0 ± 0	0.3 ± 0.21	0/11	1/11	0/11	2/10
ASV 222	Bacteroidetes	Bacteroidia	Sphingobacteriales	Sphingobacteriaceae	Sphingobacterium	0.18 ± 0.12	0.45 ± 0.21	0.09 ± 0.09	0.1 ± 0.1	2/11	4/11	1/11	1/10
ASV 224	Bacteroidetes	Bacteroidia	Flavobacteriales	Weeksellaceae	Chryseobacterium	0.18 ± 0.18	0.27 ± 0.19	0 ± 0	0.4 ± 0.4	1/11	2/11	0/11	1/10
ASV 228	Proteobacteria	Gammaproteobacteria	Pseudomonadales	Pseudomonadaceae	Pseudomonas	0.27 ± 0.27	0 ± 0	0.36 ± 0.28	1.4 ± 0.88	1/11	0/11	2/11	4/10
ASV 229	Proteobacteria	Alphaproteobacteria	Sphingomonadales	Sphingomonadaceae	Sphingomonas	2.55 ± 1.29	3.09 ± 1.16	0.18 ± 0.12	8.9 ± 3.87	5/11	6/11	2/11	4/10
ASV 232	Firmicutes	Bacilli	Bacillales	Staphylococcaceae	Staphylococcus	15.73 ± 14.46	0.36 ± 0.2	0.09 ± 0.09	0 ± 0	3/11	3/11	1/11	0/10
ASV 235	Proteobacteria	Gammaproteobacteria	Pseudomonadales	Pseudomonadaceae	Pseudomonas	0.27 ± 0.27	0.18 ± 0.18	1 ± 0.67	0 ± 0	1/11	1/11	2/11	0/10
ASV 236	Proteobacteria	Gammaproteobacteria	Betaproteobacteriales	Burkholderiaceae	Delftia	0 ± 0	0 ± 0	0 ± 0	0.1 ± 0.1	0/11	0/11	0/11	1/10
ASV 237	Proteobacteria	Alphaproteobacteria	Sphingomonadales	Sphingomonadaceae	Sphingomonas	2.73 ± 1.25	3.18 ± 1.26	0.09 ± 0.09	8.2 ± 3.54	5/11	6/11	1/11	5/10
ASV 238	Bacteroidetes	Bacteroidia	Sphingobacteriales	Sphingobacteriaceae	Sphingobacterium	0.18 ± 0.18	0 ± 0	0 ± 0	0 ± 0	1/11	0/11	0/11	0/10
ASV 239	Proteobacteria	Gammaproteobacteria	Pseudomonadales	Pseudomonadaceae	Pseudomonas	0 ± 0	0.64 ± 0.54	0.64 ± 0.43	0 ± 0	0/11	2/11	2/11	0/10
ASV 241	Bacteroidetes	Bacteroidia	Sphingobacteriales	Sphingobacteriaceae	Sphingobacterium	0.09 ± 0.09	0.36 ± 0.2	0.09 ± 0.09	0 ± 0	1/11	3/11	1/11	0/10
ASV 242	Proteobacteria	Gammaproteobacteria	Enterobacteriales	Enterobacteriaceae	NA	0 ± 0	0 ± 0	1.36 ± 0.62	1.3 ± 0.76	0/11	0/11	5/11	3/10
ASV 249	Proteobacteria	Gammaproteobacteria	Pseudomonadales	Pseudomonadaceae	Pseudomonas	0.36 ± 0.36	0.36 ± 0.36	1 ± 0.67	0 ± 0	1/11	1/11	2/11	0/10
ASV 251	Proteobacteria	Gammaproteobacteria	Enterobacteriales	Enterobacteriaceae	NA	0 ± 0	0 ± 0	0.55 ± 0.45	0.1 ± 0.1	0/11	0/11	2/11	1/10
ASV 252	Proteobacteria	Gammaproteobacteria	Pseudomonadales	Pseudomonadaceae	Pseudomonas	0 ± 0	0.18 ± 0.12	0.09 ± 0.09	0 ± 0	0/11	2/11	1/11	0/10
ASV 257	Bacteroidetes	Bacteroidia	Flavobacteriales	Crocinitomicaceae	Fluviicola	0 ± 0	0 ± 0	0.09 ± 0.09	0 ± 0	0/11	0/11	1/11	0/10
ASV 260	Proteobacteria	Gammaproteobacteria	Betaproteobacteriales	Burkholderiaceae	Delftia	0.36 ± 0.36	0.18 ± 0.12	0 ± 0	0 ± 0	1/11	2/11	0/11	0/10
ASV 261	Proteobacteria	Gammaproteobacteria	Pseudomonadales	Moraxellaceae	Alkanindiges	4.09 ± 2.3	7.82 ± 3.17	0 ± 0	1.9 ± 1.02	5/11	6/11	0/11	4/10
ASV 262	Proteobacteria	Gammaproteobacteria	Enterobacteriales	Enterobacteriaceae	Serratia	0 ± 0	0 ± 0	1.27 ± 0.63	1.2 ± 0.59	0/11	0/11	4/11	4/10
ASV 265	Proteobacteria	Gammaproteobacteria	Pseudomonadales	Pseudomonadaceae	Pseudomonas	0.27 ± 0.27	0 ± 0	0.27 ± 0.19	1.1 ± 0.69	1/11	0/11	2/11	4/10
ASV 266	Bacteroidetes	Bacteroidia	Sphingobacteriales	Sphingobacteriaceae	Sphingobacterium	0.36 ± 0.28	1.73 ± 1.54	0.09 ± 0.09	0.4 ± 0.4	2/11	2/11	1/11	1/10
ASV 268	Proteobacteria	Gammaproteobacteria	Pseudomonadales	Pseudomonadaceae	Pseudomonas	0 ± 0	0.09 ± 0.09	0.18 ± 0.18	0 ± 0	0/11	1/11	1/11	0/10
ASV 269	Proteobacteria	Gammaproteobacteria	Pseudomonadales	Pseudomonadaceae	Pseudomonas	0.82 ± 0.82	0.36 ± 0.28	0.18 ± 0.18	3 ± 2.1	1/11	2/11	1/11	3/10
ASV 271	Proteobacteria	Gammaproteobacteria	Enterobacteriales	Enterobacteriaceae	Serratia	0 ± 0	0 ± 0	0.73 ± 0.45	0 ± 0	0/11	0/11	4/11	0/10
ASV 276	Proteobacteria	Gammaproteobacteria	Betaproteobacteriales	Burkholderiaceae	Delftia	0.45 ± 0.28	0 ± 0	0.09 ± 0.09	0 ± 0	3/11	0/11	1/11	0/10
ASV 278	Proteobacteria	Gammaproteobacteria	Pseudomonadales	Moraxellaceae	Alkanindiges	3.55 ± 1.94	8 ± 3.23	0.09 ± 0.09	1.4 ± 0.65	5/11	6/11	1/11	4/10
ASV 279	Proteobacteria	Alphaproteobacteria	Sphingomonadales	Sphingomonadaceae	Sphingomonas	1.73 ± 0.68	2.73 ± 1.47	1.91 ± 1.62	1.3 ± 1.09	6/11	5/11	4/11	3/10
ASV 281	Proteobacteria	Gammaproteobacteria	Pseudomonadales	Pseudomonadaceae	Pseudomonas	0.73 ± 0.47	0.36 ± 0.2	0 ± 0	2.2 ± 1.48	3/11	3/11	0/11	3/10
ASV 282	Bacteroidetes	Bacteroidia	Sphingobacteriales	Sphingobacteriaceae	Sphingobacterium	2.45 ± 1.55	7.09 ± 5.73	0 ± 0	0.4 ± 0.4	3/11	4/11	0/11	1/10
ASV 284	Proteobacteria	Alphaproteobacteria	Sphingomonadales	Sphingomonadaceae	Sphingomonas	0.73 ± 0.51	1.55 ± 0.88	0 ± 0	1.8 ± 1.29	2/11	4/11	0/11	3/10
ASV 292	Bacteroidetes	Bacteroidia	Sphingobacteriales	Sphingobacteriaceae	Sphingobacterium	0.18 ± 0.18	0.45 ± 0.25	0.18 ± 0.12	9.7 ± 9.48	1/11	3/11	2/11	2/10
ASV 298	Proteobacteria	Alphaproteobacteria	Sphingomonadales	Sphingomonadaceae	Sphingomonas	1.09 ± 0.46	2.64 ± 1.27	1.09 ± 1.09	1.4 ± 1.19	5/11	5/11	1/11	2/10
ASV 300	Proteobacteria	Alphaproteobacteria	Rhizobiales	Rhizobiaceae	Allorhizobium-Neorhizobium-Pararhizobium-Rhizobium	1.82 ± 1.04	3.36 ± 1.17	0.09 ± 0.09	3.5 ± 2.07	4/11	6/11	1/11	3/10
ASV 303	Bacteroidetes	Bacteroidia	Sphingobacteriales	Sphingobacteriaceae	Sphingobacterium	0.45 ± 0.31	1.45 ± 1.36	0 ± 0	0.5 ± 0.5	2/11	2/11	0/11	1/10
ASV 305	Bacteroidetes	Bacteroidia	Sphingobacteriales	Sphingobacteriaceae	Sphingobacterium	2.73 ± 1.79	6.09 ± 4.83	0 ± 0	0.4 ± 0.4	3/11	5/11	0/11	1/10
ASV 307	Proteobacteria	Gammaproteobacteria	Pseudomonadales	Pseudomonadaceae	Pseudomonas	4.36 ± 3.58	0.55 ± 0.31	1.73 ± 1.35	0.7 ± 0.52	5/11	3/11	3/11	2/10
ASV 309	Bacteroidetes	Bacteroidia	Sphingobacteriales	Sphingobacteriaceae	Sphingobacterium	0.27 ± 0.19	0.55 ± 0.28	0.09 ± 0.09	8.6 ± 8.38	2/11	3/11	1/11	2/10
ASV 310	Bacteroidetes	Bacteroidia	Sphingobacteriales	Sphingobacteriaceae	Sphingobacterium	1 ± 0.49	0.36 ± 0.2	0 ± 0	0.1 ± 0.1	5/11	3/11	0/11	1/10
ASV 311	Proteobacteria	Alphaproteobacteria	Rhizobiales	Rhizobiaceae	Allorhizobium-Neorhizobium-Pararhizobium-Rhizobium	2 ± 1.01	3.36 ± 1.27	0.18 ± 0.18	3.5 ± 1.85	4/11	6/11	1/11	4/10
ASV 314	Proteobacteria	Gammaproteobacteria	Enterobacteriales	Enterobacteriaceae	NA	3.45 ± 2.42	0.09 ± 0.09	5.18 ± 5.08	0 ± 0	5/11	1/11	2/11	0/10
ASV 315	Proteobacteria	Alphaproteobacteria	Sphingomonadales	Sphingomonadaceae	Sphingomonas	0.36 ± 0.36	1.27 ± 0.71	0 ± 0	2.1 ± 1.42	1/11	3/11	0/11	3/10
ASV 316	Bacteroidetes	Bacteroidia	Chitinophagales	Chitinophagaceae	NA	0 ± 0	0 ± 0	0 ± 0	6.6 ± 6.6	0/11	0/11	0/11	1/10
ASV 317	Proteobacteria	Gammaproteobacteria	Pseudomonadales	Pseudomonadaceae	Pseudomonas	0.82 ± 0.82	0 ± 0	0 ± 0	0 ± 0	1/11	0/11	0/11	0/10
ASV 325	Proteobacteria	Alphaproteobacteria	Sphingomonadales	Sphingomonadaceae	Sphingomonas	0 ± 0	1.82 ± 1.03	0.27 ± 0.27	0 ± 0	0/11	4/11	1/11	0/10
ASV 327	Bacteroidetes	Bacteroidia	Chitinophagales	Chitinophagaceae	NA	0 ± 0	0 ± 0	0 ± 0	5.6 ± 5.6	0/11	0/11	0/11	1/10
ASV 338	Proteobacteria	Gammaproteobacteria	Pseudomonadales	Pseudomonadaceae	Pseudomonas	3.91 ± 3.32	0.73 ± 0.38	1.36 ± 1.27	0.6 ± 0.43	5/11	4/11	2/11	2/10
ASV 342	Proteobacteria	Gammaproteobacteria	Enterobacteriales	Enterobacteriaceae	NA	2.45 ± 1.91	0 ± 0	4.64 ± 4.34	0 ± 0	3/11	0/11	3/11	0/10
ASV 345	Proteobacteria	Alphaproteobacteria	Sphingomonadales	Sphingomonadaceae	Sphingomonas	0 ± 0	1.55 ± 0.78	0.36 ± 0.36	0 ± 0	0/11	4/11	1/11	0/10
ASV 347	Proteobacteria	Gammaproteobacteria	Pseudomonadales	Moraxellaceae	Alkanindiges	2.27 ± 1.06	2.73 ± 1.31	0.73 ± 0.73	0 ± 0	6/11	5/11	1/11	0/10
ASV 348	Bacteroidetes	Bacteroidia	Sphingobacteriales	Sphingobacteriaceae	Sphingobacterium	1.64 ± 1	2.73 ± 2.63	0 ± 0	0.3 ± 0.3	3/11	2/11	0/11	1/10
ASV 350	Proteobacteria	Gammaproteobacteria	Pseudomonadales	Moraxellaceae	Acinetobacter	0.36 ± 0.28	1.36 ± 1.17	0 ± 0	0.2 ± 0.13	2/11	3/11	0/11	2/10
ASV 351	Proteobacteria	Gammaproteobacteria	Cellvibrionales	Cellvibrionaceae	Cellvibrio	2.82 ± 1.56	5.64 ± 3.26	0 ± 0	0 ± 0	5/11	6/11	0/11	0/10
ASV 353	Proteobacteria	Alphaproteobacteria	Rhizobiales	Rhizobiaceae	Allorhizobium-Neorhizobium-Pararhizobium-Rhizobium	1.45 ± 0.58	1.55 ± 0.69	0.55 ± 0.55	0.1 ± 0.1	6/11	5/11	1/11	1/10
ASV 356	Bacteroidetes	Bacteroidia	Sphingobacteriales	Sphingobacteriaceae	Sphingobacterium	0.91 ± 0.49	0.27 ± 0.14	0 ± 0	0 ± 0	4/11	3/11	0/11	0/10
ASV 358	Proteobacteria	Alphaproteobacteria	Rhizobiales	Rhizobiaceae	Allorhizobium-Neorhizobium-Pararhizobium-Rhizobium	1.45 ± 0.56	1.27 ± 0.65	0.73 ± 0.63	0.1 ± 0.1	5/11	5/11	2/11	1/10
ASV 361	Proteobacteria	Gammaproteobacteria	Pseudomonadales	Pseudomonadaceae	Pseudomonas	0.91 ± 0.91	0 ± 0	0 ± 0	0 ± 0	1/11	0/11	0/11	0/10
ASV 362	Proteobacteria	Gammaproteobacteria	Cellvibrionales	Cellvibrionaceae	Cellvibrio	1.45 ± 0.56	5.73 ± 4.24	0 ± 0	0 ± 0	5/11	4/11	0/11	0/10
ASV 365	Proteobacteria	Gammaproteobacteria	Pseudomonadales	Moraxellaceae	Acinetobacter	0.36 ± 0.28	1.55 ± 1.26	0 ± 0	0.2 ± 0.2	2/11	3/11	0/11	1/10
ASV 367	Proteobacteria	Gammaproteobacteria	Pseudomonadales	Moraxellaceae	Alkanindiges	1.55 ± 0.84	2.82 ± 1.54	0.82 ± 0.72	0.1 ± 0.1	5/11	5/11	2/11	1/10
ASV 370	Proteobacteria	Gammaproteobacteria	Pseudomonadales	Pseudomonadaceae	Pseudomonas	0 ± 0	0 ± 0	1.36 ± 1.27	0.1 ± 0.1	0/11	0/11	2/11	1/10
ASV 372	Bacteroidetes	Bacteroidia	Sphingobacteriales	Sphingobacteriaceae	Sphingobacterium	1.18 ± 0.69	2.27 ± 2.17	0.18 ± 0.18	0.5 ± 0.5	4/11	2/11	1/11	1/10
ASV 374	Proteobacteria	Gammaproteobacteria	Cellvibrionales	Cellvibrionaceae	Cellvibrio	2.82 ± 1.66	4.73 ± 2.86	0 ± 0	0 ± 0	3/11	6/11	0/11	0/10
ASV 375	Proteobacteria	Gammaproteobacteria	Cellvibrionales	Cellvibrionaceae	Cellvibrio	1.45 ± 0.59	5.18 ± 3.76	0 ± 0	0 ± 0	6/11	5/11	0/11	0/10
ASV 382	Bacteroidetes	Bacteroidia	Sphingobacteriales	Sphingobacteriaceae	Sphingobacterium	1.27 ± 0.92	3.36 ± 2.97	0 ± 0	1.4 ± 1.11	3/11	3/11	0/11	2/10
ASV 385	Proteobacteria	Gammaproteobacteria	Pseudomonadales	Pseudomonadaceae	Pseudomonas	0 ± 0	0 ± 0	1.36 ± 0.91	5.2 ± 3.41	0/11	0/11	4/11	4/10
ASV 389	Proteobacteria	Alphaproteobacteria	Caulobacterales	Caulobacteraceae	Caulobacter	1.27 ± 0.92	2.91 ± 1.42	0.09 ± 0.09	1.3 ± 0.56	3/11	6/11	1/11	5/10
ASV 390	Bacteroidetes	Bacteroidia	Flavobacteriales	Flavobacteriaceae	Flavobacterium	0.91 ± 0.51	1.45 ± 0.65	0.73 ± 0.56	0 ± 0	3/11	4/11	2/11	0/10
ASV 392	Proteobacteria	Gammaproteobacteria	Enterobacteriales	Enterobacteriaceae	NA	0.36 ± 0.28	0.73 ± 0.38	0 ± 0	2.9 ± 2.31	2/11	3/11	0/11	2/10
ASV 393	Bacteroidetes	Bacteroidia	Sphingobacteriales	Sphingobacteriaceae	Sphingobacterium	1.18 ± 0.83	3.09 ± 2.41	0.27 ± 0.19	1.1 ± 0.82	3/11	4/11	2/11	2/10
ASV 395	Proteobacteria	Gammaproteobacteria	Pseudomonadales	Pseudomonadaceae	Pseudomonas	0 ± 0	0 ± 0	1.09 ± 1.09	0.1 ± 0.1	0/11	0/11	1/11	1/10
ASV 396	Proteobacteria	Gammaproteobacteria	Enterobacteriales	Enterobacteriaceae	NA	0.64 ± 0.47	0.82 ± 0.38	0 ± 0	2.5 ± 1.98	2/11	4/11	0/11	3/10
ASV 404	Proteobacteria	Gammaproteobacteria	Pseudomonadales	Pseudomonadaceae	Pseudomonas	0 ± 0	0 ± 0	1.27 ± 1.08	5.4 ± 3.43	0/11	0/11	3/11	4/10
ASV 405	Proteobacteria	Gammaproteobacteria	Pseudomonadales	Pseudomonadaceae	Pseudomonas	2.18 ± 1.89	0.45 ± 0.37	0 ± 0	0 ± 0	4/11	2/11	0/11	0/10
ASV 407	Proteobacteria	Alphaproteobacteria	Caulobacterales	Caulobacteraceae	Caulobacter	1.55 ± 0.95	2.73 ± 1.11	0.09 ± 0.09	1.3 ± 0.58	3/11	6/11	1/11	4/10
ASV 409	Bacteroidetes	Bacteroidia	Sphingobacteriales	Sphingobacteriaceae	Sphingobacterium	0.27 ± 0.19	0 ± 0	0 ± 0	0 ± 0	2/11	0/11	0/11	0/10
ASV 412	Firmicutes	Bacilli	Bacillales	Staphylococcaceae	Staphylococcus	5.09 ± 1.94	0.73 ± 0.73	0 ± 0	0 ± 0	6/11	1/11	0/11	0/10
ASV 414	Proteobacteria	Gammaproteobacteria	Pseudomonadales	Pseudomonadaceae	Pseudomonas	0.73 ± 0.47	1 ± 0.56	1.09 ± 0.84	0.3 ± 0.21	3/11	3/11	2/11	2/10
ASV 418	Proteobacteria	Gammaproteobacteria	Xanthomonadales	Xanthomonadaceae	Luteimonas	0 ± 0	0 ± 0	0 ± 0	5.3 ± 5.3	0/11	0/11	0/11	1/10
ASV 419	Proteobacteria	Alphaproteobacteria	Caulobacterales	Caulobacteraceae	Caulobacter	0.55 ± 0.21	0.73 ± 0.63	0.64 ± 0.64	0.2 ± 0.2	5/11	2/11	1/11	1/10
ASV 420	Bacteroidetes	Bacteroidia	Sphingobacteriales	Sphingobacteriaceae	Parapedobacter	0.27 ± 0.19	0.73 ± 0.51	0 ± 0	0 ± 0	2/11	2/11	0/11	0/10
ASV 421	Proteobacteria	Gammaproteobacteria	Xanthomonadales	Xanthomonadaceae	Stenotrophomonas	0.64 ± 0.34	0.27 ± 0.19	0 ± 0	0 ± 0	3/11	2/11	0/11	0/10
ASV 422	Bacteroidetes	Bacteroidia	Sphingobacteriales	Sphingobacteriaceae	Parapedobacter	2.45 ± 1.25	0.73 ± 0.51	0 ± 0	0 ± 0	4/11	2/11	0/11	0/10
ASV 423	Proteobacteria	Gammaproteobacteria	Pseudomonadales	Pseudomonadaceae	Pseudomonas	2.36 ± 2.27	0.36 ± 0.28	0 ± 0	0 ± 0	2/11	2/11	0/11	0/10
ASV 424	Proteobacteria	Gammaproteobacteria	Pseudomonadales	Pseudomonadaceae	Pseudomonas	0.45 ± 0.28	1.18 ± 0.6	0.45 ± 0.45	2.5 ± 1.67	3/11	5/11	1/11	4/10
ASV 429	Proteobacteria	Gammaproteobacteria	Enterobacteriales	Enterobacteriaceae	NA	0 ± 0	0.91 ± 0.44	0 ± 0	1.6 ± 1.08	0/11	4/11	0/11	4/10
ASV 430	Firmicutes	Bacilli	Bacillales	Staphylococcaceae	Staphylococcus	4.09 ± 1.56	0.45 ± 0.45	0 ± 0	0 ± 0	6/11	1/11	0/11	0/10
ASV 431	Bacteroidetes	Bacteroidia	Chitinophagales	Chitinophagaceae	Vibrionimonas	0.36 ± 0.24	1.64 ± 0.72	0.18 ± 0.18	0 ± 0	2/11	5/11	1/11	0/10
ASV 432	Bacteroidetes	Bacteroidia	Sphingobacteriales	Sphingobacteriaceae	Sphingobacterium	0.91 ± 0.58	1.36 ± 0.49	0.18 ± 0.18	2.1 ± 1.68	3/11	6/11	1/11	3/10
ASV 433	Proteobacteria	Gammaproteobacteria	Enterobacteriales	Enterobacteriaceae	Escherichia/Shigella	0.09 ± 0.09	1.36 ± 0.58	0.18 ± 0.18	0.1 ± 0.1	1/11	5/11	1/11	1/10
ASV 434	Proteobacteria	Gammaproteobacteria	Enterobacteriales	Enterobacteriaceae	NA	0.36 ± 0.2	0.64 ± 0.47	0.27 ± 0.27	0 ± 0	3/11	2/11	1/11	0/10
ASV 435	Bacteroidetes	Bacteroidia	Flavobacteriales	Flavobacteriaceae	NA	1.09 ± 0.67	1.36 ± 0.65	0 ± 0	0 ± 0	3/11	4/11	0/11	0/10
ASV 436	Proteobacteria	Gammaproteobacteria	Pseudomonadales	Pseudomonadaceae	Pseudomonas	0.64 ± 0.39	0.45 ± 0.25	1.18 ± 0.92	0.2 ± 0.2	3/11	3/11	2/11	1/10
ASV 437	Proteobacteria	Alphaproteobacteria	Rhodobacterales	Rhodobacteraceae	Defluviimonas	0.45 ± 0.31	1.45 ± 0.68	0 ± 0	1.1 ± 0.82	2/11	5/11	0/11	2/10
ASV 438	Proteobacteria	Gammaproteobacteria	Enterobacteriales	Enterobacteriaceae	NA	2.27 ± 1.98	0.09 ± 0.09	0.73 ± 0.41	2.2 ± 1.61	3/11	1/11	3/11	3/10
ASV 441	Bacteroidetes	Bacteroidia	Chitinophagales	Chitinophagaceae	Vibrionimonas	0 ± 0	1.09 ± 0.58	0.09 ± 0.09	0.2 ± 0.13	0/11	3/11	1/11	2/10
ASV 442	Proteobacteria	Alphaproteobacteria	Caulobacterales	Caulobacteraceae	Caulobacter	0.27 ± 0.14	0.82 ± 0.55	0.82 ± 0.72	0 ± 0	3/11	3/11	2/11	0/10
ASV 443	Proteobacteria	Gammaproteobacteria	Xanthomonadales	Xanthomonadaceae	Luteimonas	0 ± 0	0 ± 0	0 ± 0	4.9 ± 4.9	0/11	0/11	0/11	1/10
ASV 444	Bacteroidetes	Bacteroidia	Sphingobacteriales	Sphingobacteriaceae	Parapedobacter	2 ± 0.93	0.64 ± 0.47	0 ± 0	0 ± 0	4/11	2/11	0/11	0/10
ASV 446	Bacteroidetes	Bacteroidia	Sphingobacteriales	Sphingobacteriaceae	Parapedobacter	0.45 ± 0.31	0.73 ± 0.51	0 ± 0	0 ± 0	2/11	2/11	0/11	0/10
ASV 448	Bacteroidetes	Bacteroidia	Flavobacteriales	Flavobacteriaceae	Flavobacterium	1.09 ± 0.62	2.18 ± 0.64	0.45 ± 0.45	0.9 ± 0.64	3/11	6/11	1/11	2/10
ASV 454	Bacteroidetes	Bacteroidia	Sphingobacteriales	Sphingobacteriaceae	Sphingobacterium	0 ± 0	0 ± 0	0 ± 0	0.4 ± 0.4	0/11	0/11	0/11	1/10
ASV 456	Proteobacteria	Gammaproteobacteria	Pseudomonadales	Pseudomonadaceae	Pseudomonas	0.36 ± 0.36	0.82 ± 0.42	0.73 ± 0.56	2.3 ± 1.69	1/11	4/11	2/11	3/10
ASV 458	Bacteroidetes	Bacteroidia	Flavobacteriales	Weeksellaceae	Chryseobacterium	0 ± 0	0.27 ± 0.27	0 ± 0	0 ± 0	0/11	1/11	0/11	0/10
ASV 460	Proteobacteria	Gammaproteobacteria	Enterobacteriales	Enterobacteriaceae	Escherichia/Shigella	0.18 ± 0.18	0.82 ± 0.38	0 ± 0	0 ± 0	1/11	4/11	0/11	0/10
ASV 461	Bacteroidetes	Bacteroidia	Sphingobacteriales	Sphingobacteriaceae	Sphingobacterium	0.73 ± 0.47	1.55 ± 0.53	0 ± 0	2 ± 1.67	3/11	6/11	0/11	4/10
ASV 463	Firmicutes	Bacilli	Bacillales	Staphylococcaceae	Staphylococcus	4 ± 1.72	0.36 ± 0.36	0 ± 0	0 ± 0	6/11	1/11	0/11	0/10
ASV 465	Proteobacteria	Gammaproteobacteria	Enterobacteriales	Enterobacteriaceae	NA	2.36 ± 1.98	0 ± 0	0.73 ± 0.38	2 ± 1.48	3/11	0/11	3/11	4/10
ASV 467	Proteobacteria	Gammaproteobacteria	Xanthomonadales	Xanthomonadaceae	Stenotrophomonas	0.55 ± 0.28	0.18 ± 0.18	0 ± 0	0 ± 0	3/11	1/11	0/11	0/10
ASV 471	Bacteroidetes	Bacteroidia	Sphingobacteriales	Sphingobacteriaceae	Sphingobacterium	0.09 ± 0.09	0 ± 0	0 ± 0	0.5 ± 0.5	1/11	0/11	0/11	1/10
ASV 476	Bacteroidetes	Bacteroidia	Flavobacteriales	Weeksellaceae	Chryseobacterium	0 ± 0	0.27 ± 0.27	0 ± 0	0 ± 0	0/11	1/11	0/11	0/10
ASV 477	Proteobacteria	Gammaproteobacteria	Pseudomonadales	Pseudomonadaceae	Pseudomonas	0.27 ± 0.14	0.91 ± 0.72	0.09 ± 0.09	1.2 ± 1.2	3/11	3/11	1/11	1/10
ASV 478	Proteobacteria	Gammaproteobacteria	Pseudomonadales	Pseudomonadaceae	Pseudomonas	0.27 ± 0.14	0.18 ± 0.18	0.09 ± 0.09	0 ± 0	3/11	1/11	1/11	0/10
ASV 479	Proteobacteria	Gammaproteobacteria	Pseudomonadales	Pseudomonadaceae	Pseudomonas	0.45 ± 0.25	0.91 ± 0.64	0 ± 0	1.5 ± 1.5	3/11	3/11	0/11	1/10
ASV 482	Proteobacteria	Gammaproteobacteria	Pseudomonadales	Pseudomonadaceae	Pseudomonas	0.27 ± 0.27	0.73 ± 0.47	0 ± 0	0 ± 0	1/11	3/11	0/11	0/10
ASV 483	Proteobacteria	Gammaproteobacteria	Pseudomonadales	Pseudomonadaceae	Pseudomonas	0.27 ± 0.19	0.64 ± 0.36	0 ± 0	0 ± 0	2/11	3/11	0/11	0/10
ASV 485	Proteobacteria	Alphaproteobacteria	Rhodobacterales	Rhodobacteraceae	Defluviimonas	0.45 ± 0.25	0.73 ± 0.47	0 ± 0	0.9 ± 0.71	3/11	3/11	0/11	2/10
ASV 488	Proteobacteria	Gammaproteobacteria	Enterobacteriales	Enterobacteriaceae	Escherichia/Shigella	0 ± 0	0.36 ± 0.2	0 ± 0	1.4 ± 0.99	0/11	3/11	0/11	3/10
ASV 489	Proteobacteria	Alphaproteobacteria	Rhizobiales	Rhizobiaceae	Falsochrobactrum	0.09 ± 0.09	0.64 ± 0.47	0 ± 0	1.1 ± 1.1	1/11	2/11	0/11	1/10
ASV 491	Proteobacteria	Gammaproteobacteria	Pseudomonadales	Pseudomonadaceae	Pseudomonas	0.09 ± 0.09	0.27 ± 0.19	0 ± 0	0.2 ± 0.2	1/11	2/11	0/11	1/10
ASV 492	Proteobacteria	Alphaproteobacteria	Rhodobacterales	Rhodobacteraceae	Defluviimonas	0.09 ± 0.09	0.18 ± 0.12	0.27 ± 0.27	0.7 ± 0.7	1/11	2/11	1/11	1/10
ASV 493	Proteobacteria	Gammaproteobacteria	Xanthomonadales	Xanthomonadaceae	Stenotrophomonas	0 ± 0	1.82 ± 1.27	0 ± 0	0 ± 0	0/11	3/11	0/11	0/10
ASV 494	Firmicutes	Bacilli	Bacillales	Staphylococcaceae	Staphylococcus	2.73 ± 1.21	0.55 ± 0.55	0 ± 0	0 ± 0	6/11	1/11	0/11	0/10
ASV 495	Bacteroidetes	Bacteroidia	Chitinophagales	Chitinophagaceae	Vibrionimonas	0.27 ± 0.19	0.91 ± 0.51	0 ± 0	0.7 ± 0.42	2/11	3/11	0/11	3/10
ASV 497	Proteobacteria	Gammaproteobacteria	Enterobacteriales	Enterobacteriaceae	Escherichia/Shigella	0 ± 0	0.45 ± 0.28	0.27 ± 0.27	0 ± 0	0/11	3/11	1/11	0/10
ASV 500	Proteobacteria	Gammaproteobacteria	Pseudomonadales	Pseudomonadaceae	Pseudomonas	0 ± 0	0 ± 0	0 ± 0	4.1 ± 4.1	0/11	0/11	0/11	1/10
ASV 502	Firmicutes	Bacilli	Bacillales	Staphylococcaceae	Staphylococcus	3 ± 1.18	0.55 ± 0.55	0 ± 0	0 ± 0	5/11	1/11	0/11	0/10
ASV 504	Proteobacteria	Gammaproteobacteria	Pseudomonadales	Pseudomonadaceae	Pseudomonas	0 ± 0	0 ± 0	1.27 ± 1.18	2.7 ± 2.29	0/11	0/11	2/11	2/10
ASV 506	Proteobacteria	Alphaproteobacteria	Sphingomonadales	Sphingomonadaceae	Novosphingobium	0 ± 0	0.36 ± 0.2	0 ± 0	0 ± 0	0/11	3/11	0/11	0/10
ASV 507	Proteobacteria	Gammaproteobacteria	Pseudomonadales	Pseudomonadaceae	Pseudomonas	0 ± 0	0 ± 0	0 ± 0	3.6 ± 3.6	0/11	0/11	0/11	1/10
ASV 508	Bacteroidetes	Bacteroidia	Chitinophagales	Chitinophagaceae	Taibaiella	0.09 ± 0.09	3.18 ± 3.18	0 ± 0	0.3 ± 0.3	1/11	1/11	0/11	1/10
ASV 509	Proteobacteria	Gammaproteobacteria	Xanthomonadales	Xanthomonadaceae	NA	0.27 ± 0.27	0.82 ± 0.33	0 ± 0	0.1 ± 0.1	1/11	5/11	0/11	1/10
ASV 510	Proteobacteria	Gammaproteobacteria	Xanthomonadales	Xanthomonadaceae	Stenotrophomonas	0 ± 0	2 ± 1.37	0 ± 0	0 ± 0	0/11	3/11	0/11	0/10
ASV 516	Bacteroidetes	Bacteroidia	Chitinophagales	Chitinophagaceae	Vibrionimonas	0 ± 0	0.55 ± 0.39	0 ± 0	0.8 ± 0.7	0/11	2/11	0/11	2/10
ASV 518	Proteobacteria	Alphaproteobacteria	Sphingomonadales	Sphingomonadaceae	Novosphingobium	0.09 ± 0.09	0.45 ± 0.28	0 ± 0	0 ± 0	1/11	3/11	0/11	0/10
ASV 521	Proteobacteria	Alphaproteobacteria	Rhodobacterales	Rhodobacteraceae	Defluviimonas	0.18 ± 0.18	0 ± 0	0.55 ± 0.37	0.7 ± 0.7	1/11	0/11	2/11	1/10
ASV 524	Bacteroidetes	Bacteroidia	Sphingobacteriales	Sphingobacteriaceae	Sphingobacterium	0.55 ± 0.31	0.09 ± 0.09	0.09 ± 0.09	0 ± 0	3/11	1/11	1/11	0/10
ASV 525	Bacteroidetes	Bacteroidia	Chitinophagales	Chitinophagaceae	Taibaiella	2.91 ± 1.99	0 ± 0	0 ± 0	0 ± 0	2/11	0/11	0/11	0/10
ASV 528	Bacteroidetes	Bacteroidia	Chitinophagales	Chitinophagaceae	Taibaiella	0 ± 0	2.73 ± 2.73	0 ± 0	0.2 ± 0.2	0/11	1/11	0/11	1/10
ASV 531	Bacteroidetes	Bacteroidia	Sphingobacteriales	Sphingobacteriaceae	Sphingobacterium	0.36 ± 0.2	0.09 ± 0.09	0.09 ± 0.09	0 ± 0	3/11	1/11	1/11	0/10
ASV 534	Bacteroidetes	Bacteroidia	Sphingobacteriales	Sphingobacteriaceae	Parapedobacter	0 ± 0	0 ± 0	0.27 ± 0.19	0.4 ± 0.4	0/11	0/11	2/11	1/10
ASV 535	Bacteroidetes	Bacteroidia	Flavobacteriales	Flavobacteriaceae	Flavobacterium	1 ± 0.73	0.91 ± 0.49	0 ± 0	0.8 ± 0.8	3/11	3/11	0/11	1/10
ASV 539	Proteobacteria	Gammaproteobacteria	Xanthomonadales	Xanthomonadaceae	NA	0.09 ± 0.09	0.73 ± 0.41	0 ± 0	0 ± 0	1/11	3/11	0/11	0/10
ASV 540	Firmicutes	Bacilli	Bacillales	Staphylococcaceae	Staphylococcus	2.55 ± 1.08	0.27 ± 0.27	0 ± 0	0 ± 0	5/11	1/11	0/11	0/10
ASV 543	Bacteroidetes	Bacteroidia	Chitinophagales	NA	NA	0.27 ± 0.27	0 ± 0	0 ± 0	2.4 ± 2.4	1/11	0/11	0/11	1/10
ASV 544	Proteobacteria	Alphaproteobacteria	Rhizobiales	Rhizobiaceae	Falsochrobactrum	0.09 ± 0.09	0.36 ± 0.36	0 ± 0	1.1 ± 1.1	1/11	1/11	0/11	1/10
ASV 545	Proteobacteria	Gammaproteobacteria	Pseudomonadales	Pseudomonadaceae	Pseudomonas	0.82 ± 0.55	0.27 ± 0.19	0.36 ± 0.36	1.1 ± 0.77	2/11	2/11	1/11	2/10
ASV 546	Bacteroidetes	Bacteroidia	Chitinophagales	Chitinophagaceae	Taibaiella	2.91 ± 1.91	0 ± 0	0 ± 0	0 ± 0	3/11	0/11	0/11	0/10
ASV 547	Proteobacteria	Gammaproteobacteria	Pseudomonadales	Pseudomonadaceae	Pseudomonas	0 ± 0	0 ± 0	0.91 ± 0.81	2 ± 1.61	0/11	0/11	2/11	2/10
ASV 550	Proteobacteria	Alphaproteobacteria	Sphingomonadales	Sphingomonadaceae	Sphingomonas	0.55 ± 0.31	0.45 ± 0.31	0 ± 0	1.6 ± 0.67	3/11	2/11	0/11	4/10
ASV 554	Bacteroidetes	Bacteroidia	Flavobacteriales	Flavobacteriaceae	Flavobacterium	0 ± 0	0 ± 0	0.09 ± 0.09	0 ± 0	0/11	0/11	1/11	0/10
ASV 557	Bacteroidetes	Bacteroidia	Chitinophagales	Chitinophagaceae	NA	0.18 ± 0.18	1.27 ± 1.27	0 ± 0	0 ± 0	1/11	1/11	0/11	0/10
ASV 558	Proteobacteria	Gammaproteobacteria	Xanthomonadales	Xanthomonadaceae	NA	0.64 ± 0.39	1.09 ± 0.41	0 ± 0	0 ± 0	3/11	5/11	0/11	0/10
ASV 561	Proteobacteria	Gammaproteobacteria	Pseudomonadales	Pseudomonadaceae	Pseudomonas	0 ± 0	0 ± 0	0.18 ± 0.18	0 ± 0	0/11	0/11	1/11	0/10
ASV 562	Bacteroidetes	Bacteroidia	Sphingobacteriales	Sphingobacteriaceae	Parapedobacter	0 ± 0	0 ± 0	0.18 ± 0.18	0.2 ± 0.2	0/11	0/11	1/11	1/10
ASV 563	Proteobacteria	Alphaproteobacteria	Rhizobiales	Rhizobiaceae	Allorhizobium-Neorhizobium-Pararhizobium-Rhizobium	0.73 ± 0.47	1.55 ± 0.76	0 ± 0	0.1 ± 0.1	3/11	5/11	0/11	1/10
ASV 564	Bacteroidetes	Bacteroidia	Flavobacteriales	Flavobacteriaceae	Flavobacterium	0 ± 0	0.45 ± 0.37	0 ± 0	0.3 ± 0.3	0/11	2/11	0/11	1/10
ASV 565	Bacteroidetes	Bacteroidia	Chitinophagales	Chitinophagaceae	NA	0.09 ± 0.09	0 ± 0	0 ± 0	2.5 ± 2.5	1/11	0/11	0/11	1/10
ASV 566	Proteobacteria	Gammaproteobacteria	Xanthomonadales	Xanthomonadaceae	Thermomonas	0 ± 0	0.82 ± 0.46	0 ± 0	0 ± 0	0/11	4/11	0/11	0/10
ASV 567	Bacteroidetes	Bacteroidia	Sphingobacteriales	Sphingobacteriaceae	Sphingobacterium	0.27 ± 0.19	1.18 ± 1.18	0 ± 0	0.2 ± 0.2	2/11	1/11	0/11	1/10
ASV 572	Bacteroidetes	Bacteroidia	Sphingobacteriales	Sphingobacteriaceae	Sphingobacterium	0.64 ± 0.31	0.55 ± 0.28	0.55 ± 0.55	0 ± 0	4/11	3/11	1/11	0/10
ASV 574	Proteobacteria	Alphaproteobacteria	Rickettsiales	Anaplasmataceae	Wolbachia	0 ± 0	0 ± 0	1.27 ± 0.54	1.6 ± 0.82	0/11	0/11	4/11	3/10
ASV 580	Bacteroidetes	Bacteroidia	Flavobacteriales	Flavobacteriaceae	Flavobacterium	0 ± 0	0.09 ± 0.09	0.36 ± 0.36	0.4 ± 0.31	0/11	1/11	1/11	2/10
ASV 581	Bacteroidetes	Bacteroidia	Sphingobacteriales	Sphingobacteriaceae	Parapedobacter	0 ± 0	2.36 ± 2.08	0 ± 0	0 ± 0	0/11	2/11	0/11	0/10
ASV 582	Proteobacteria	Alphaproteobacteria	Sphingomonadales	Sphingomonadaceae	Sphingomonas	0.36 ± 0.24	0.45 ± 0.28	0 ± 0	1.5 ± 0.73	2/11	3/11	0/11	4/10
ASV 583	Bacteroidetes	Bacteroidia	Chitinophagales	Chitinophagaceae	NA	0.27 ± 0.27	0.82 ± 0.82	0 ± 0	0 ± 0	1/11	1/11	0/11	0/10
ASV 586	Proteobacteria	Alphaproteobacteria	Caulobacterales	Caulobacteraceae	Brevundimonas	2.09 ± 1.34	0.82 ± 0.55	0 ± 0	0 ± 0	4/11	2/11	0/11	0/10
ASV 588	Proteobacteria	Alphaproteobacteria	Rhizobiales	Rhizobiaceae	Allorhizobium-Neorhizobium-Pararhizobium-Rhizobium	0 ± 0	0 ± 0	0.18 ± 0.18	0 ± 0	0/11	0/11	1/11	0/10
ASV 590	Proteobacteria	Alphaproteobacteria	Rhizobiales	Rhizobiaceae	Allorhizobium-Neorhizobium-Pararhizobium-Rhizobium	0.82 ± 0.42	1.55 ± 0.77	0 ± 0	0 ± 0	3/11	5/11	0/11	0/10
ASV 593	Proteobacteria	Alphaproteobacteria	Rhizobiales	Rhizobiaceae	Allorhizobium-Neorhizobium-Pararhizobium-Rhizobium	0 ± 0	0 ± 0	0.27 ± 0.27	0 ± 0	0/11	0/11	1/11	0/10
ASV 594	Firmicutes	Bacilli	Bacillales	Staphylococcaceae	Staphylococcus	2.27 ± 2.27	0 ± 0	0 ± 0	0 ± 0	1/11	0/11	0/11	0/10
ASV 598	Proteobacteria	Gammaproteobacteria	Pseudomonadales	Pseudomonadaceae	Pseudomonas	0.36 ± 0.28	0.18 ± 0.12	0.18 ± 0.18	0.4 ± 0.31	2/11	2/11	1/11	2/10
ASV 599	Bacteroidetes	Bacteroidia	Sphingobacteriales	Sphingobacteriaceae	Parapedobacter	0 ± 0	1.91 ± 1.91	0 ± 0	0 ± 0	0/11	1/11	0/11	0/10
ASV 600	Firmicutes	Bacilli	Bacillales	Staphylococcaceae	Staphylococcus	2.09 ± 0.88	0.09 ± 0.09	0 ± 0	0 ± 0	5/11	1/11	0/11	0/10
ASV 604	Firmicutes	Bacilli	Bacillales	Staphylococcaceae	Staphylococcus	2.09 ± 2.09	0 ± 0	0 ± 0	0 ± 0	1/11	0/11	0/11	0/10
ASV 605	Proteobacteria	Gammaproteobacteria	Pseudomonadales	Pseudomonadaceae	Pseudomonas	0 ± 0	0 ± 0	0 ± 0	2 ± 2	0/11	0/11	0/11	1/10
ASV 609	Proteobacteria	Gammaproteobacteria	Xanthomonadales	Xanthomonadaceae	NA	0.91 ± 0.41	0.82 ± 0.58	0.09 ± 0.09	0 ± 0	4/11	2/11	1/11	0/10
ASV 613	Proteobacteria	Gammaproteobacteria	Pseudomonadales	Pseudomonadaceae	Pseudomonas	0.27 ± 0.27	0.09 ± 0.09	0 ± 0	0.4 ± 0.4	1/11	1/11	0/11	1/10
ASV 614	Bacteroidetes	Bacteroidia	Sphingobacteriales	Sphingobacteriaceae	Sphingobacterium	0.45 ± 0.21	0.27 ± 0.19	0.55 ± 0.45	0 ± 0	4/11	2/11	2/11	0/10
ASV 617	Bacteroidetes	Bacteroidia	Sphingobacteriales	Sphingobacteriaceae	Sphingobacterium	0 ± 0	0.91 ± 0.91	0 ± 0	0 ± 0	0/11	1/11	0/11	0/10
ASV 618	Firmicutes	Bacilli	Bacillales	Staphylococcaceae	Staphylococcus	1.45 ± 0.62	0.27 ± 0.27	0 ± 0	0 ± 0	5/11	1/11	0/11	0/10
ASV 620	Proteobacteria	Gammaproteobacteria	Pseudomonadales	Pseudomonadaceae	Pseudomonas	0.64 ± 0.64	0.09 ± 0.09	0 ± 0	0.5 ± 0.5	1/11	1/11	0/11	1/10
ASV 622	Proteobacteria	Alphaproteobacteria	Caulobacterales	Caulobacteraceae	Brevundimonas	1.64 ± 1.19	0.45 ± 0.45	0 ± 0	0 ± 0	3/11	1/11	0/11	0/10
ASV 624	Bacteroidetes	Bacteroidia	Sphingobacteriales	Sphingobacteriaceae	Sphingobacterium	0 ± 0	0 ± 0	0 ± 0	0.5 ± 0.5	0/11	0/11	0/11	1/10
ASV 628	Proteobacteria	Alphaproteobacteria	Sphingomonadales	Sphingomonadaceae	Novosphingobium	0 ± 0	0.09 ± 0.09	0 ± 0	0.5 ± 0.34	0/11	1/11	0/11	2/10
ASV 632	Proteobacteria	Gammaproteobacteria	Pseudomonadales	Pseudomonadaceae	Pseudomonas	0 ± 0	0 ± 0	0 ± 0	1 ± 0.56	0/11	0/11	0/11	3/10
ASV 634	Proteobacteria	Gammaproteobacteria	Xanthomonadales	Xanthomonadaceae	Luteimonas	0.09 ± 0.09	0.45 ± 0.31	0 ± 0	0.7 ± 0.7	1/11	2/11	0/11	1/10
ASV 638	Proteobacteria	Gammaproteobacteria	Pseudomonadales	Pseudomonadaceae	Pseudomonas	0 ± 0	0 ± 0	0 ± 0	2 ± 2	0/11	0/11	0/11	1/10
ASV 640	Firmicutes	Bacilli	Bacillales	Staphylococcaceae	Staphylococcus	1.82 ± 1.82	0 ± 0	0 ± 0	0 ± 0	1/11	0/11	0/11	0/10
ASV 642	Proteobacteria	Alphaproteobacteria	Caulobacterales	Caulobacteraceae	Brevundimonas	0.18 ± 0.18	0.09 ± 0.09	0 ± 0	1.3 ± 1.3	1/11	1/11	0/11	1/10
ASV 645	Bacteroidetes	Bacteroidia	Flavobacteriales	Flavobacteriaceae	NA	0.18 ± 0.18	0 ± 0	0 ± 0	0 ± 0	1/11	0/11	0/11	0/10
ASV 646	Proteobacteria	Deltaproteobacteria	Bdellovibrionales	Bacteriovoracaceae	Peredibacter	0.09 ± 0.09	0.18 ± 0.18	0 ± 0	0.2 ± 0.13	1/11	1/11	0/11	2/10
ASV 649	Proteobacteria	Alphaproteobacteria	Sphingomonadales	Sphingomonadaceae	Novosphingobium	0 ± 0	0.18 ± 0.12	0 ± 0	0.2 ± 0.2	0/11	2/11	0/11	1/10
ASV 651	Firmicutes	Bacilli	Bacillales	Bacillaceae	Bacillus	0 ± 0	0.18 ± 0.18	0 ± 0	0.1 ± 0.1	0/11	1/11	0/11	1/10
ASV 652	Proteobacteria	Gammaproteobacteria	Pseudomonadales	Pseudomonadaceae	Pseudomonas	0 ± 0	0 ± 0	0 ± 0	0.9 ± 0.48	0/11	0/11	0/11	3/10
ASV 655	Proteobacteria	Gammaproteobacteria	Xanthomonadales	Xanthomonadaceae	Thermomonas	0.27 ± 0.27	0.36 ± 0.28	0 ± 0	1 ± 1	1/11	2/11	0/11	1/10
ASV 656	Proteobacteria	Alphaproteobacteria	Rickettsiales	Anaplasmataceae	Wolbachia	0 ± 0	0 ± 0	0.73 ± 0.49	1.2 ± 0.8	0/11	0/11	2/11	2/10
ASV 663	Proteobacteria	Alphaproteobacteria	Sphingomonadales	Sphingomonadaceae	Novosphingobium	0.18 ± 0.12	0.09 ± 0.09	0 ± 0	1.5 ± 0.89	2/11	1/11	0/11	4/10
ASV 667	Proteobacteria	Alphaproteobacteria	Rhizobiales	Rhizobiaceae	Allorhizobium-Neorhizobium-Pararhizobium-Rhizobium	0.18 ± 0.12	0.91 ± 0.51	0.09 ± 0.09	0 ± 0	2/11	3/11	1/11	0/10
ASV 669	Bacteroidetes	Bacteroidia	Flavobacteriales	Weeksellaceae	Chryseobacterium	0.27 ± 0.27	0.73 ± 0.49	0 ± 0	0.4 ± 0.4	1/11	2/11	0/11	1/10
ASV 670	Firmicutes	Bacilli	Bacillales	Staphylococcaceae	Staphylococcus	1.64 ± 1.64	0 ± 0	0 ± 0	0 ± 0	1/11	0/11	0/11	0/10
ASV 675	Proteobacteria	Alphaproteobacteria	Rhizobiales	Rhizobiaceae	Allorhizobium-Neorhizobium-Pararhizobium-Rhizobium	0.27 ± 0.19	0.73 ± 0.38	0 ± 0	0 ± 0	2/11	3/11	0/11	0/10
ASV 678	Firmicutes	Bacilli	Bacillales	Staphylococcaceae	Staphylococcus	1.91 ± 1.91	0 ± 0	0 ± 0	0 ± 0	1/11	0/11	0/11	0/10
ASV 680	Firmicutes	Bacilli	Bacillales	Staphylococcaceae	Staphylococcus	1.64 ± 1.64	0 ± 0	0 ± 0	0 ± 0	1/11	0/11	0/11	0/10
ASV 683	Firmicutes	Bacilli	Bacillales	Bacillaceae	Bacillus	0 ± 0	0.09 ± 0.09	0 ± 0	0 ± 0	0/11	1/11	0/11	0/10
ASV 685	Bacteroidetes	Bacteroidia	Sphingobacteriales	Sphingobacteriaceae	Pedobacter	0.45 ± 0.45	0.91 ± 0.61	0 ± 0	0 ± 0	1/11	2/11	0/11	0/10
ASV 686	Proteobacteria	Alphaproteobacteria	Caulobacterales	Caulobacteraceae	Brevundimonas	0 ± 0	0.18 ± 0.18	0 ± 0	0 ± 0	0/11	1/11	0/11	0/10
ASV 687	Proteobacteria	Alphaproteobacteria	Sphingomonadales	Sphingomonadaceae	Novosphingobium	0.09 ± 0.09	0.55 ± 0.28	0 ± 0	0.1 ± 0.1	1/11	3/11	0/11	1/10
ASV 692	Bacteroidetes	Bacteroidia	Sphingobacteriales	Sphingobacteriaceae	Pedobacter	0.45 ± 0.45	1 ± 0.67	0 ± 0	0 ± 0	1/11	2/11	0/11	0/10
ASV 695	Proteobacteria	Alphaproteobacteria	Rhizobiales	Rhizobiaceae	Allorhizobium-Neorhizobium-Pararhizobium-Rhizobium	0 ± 0	0.09 ± 0.09	0 ± 0	0.2 ± 0.2	0/11	1/11	0/11	1/10
ASV 696	Proteobacteria	Alphaproteobacteria	Caulobacterales	Caulobacteraceae	Brevundimonas	0.09 ± 0.09	0 ± 0	0 ± 0	0.8 ± 0.8	1/11	0/11	0/11	1/10
ASV 698	Proteobacteria	Alphaproteobacteria	Rhizobiales	Rhizobiaceae	Falsochrobactrum	0.09 ± 0.09	0 ± 0	0 ± 0	0.2 ± 0.2	1/11	0/11	0/11	1/10
ASV 700	Proteobacteria	Alphaproteobacteria	Rhizobiales	Xanthobacteraceae	Bradyrhizobium	0.45 ± 0.31	0.45 ± 0.25	0 ± 0	0.1 ± 0.1	2/11	3/11	0/11	1/10
ASV 702	Proteobacteria	Gammaproteobacteria	Xanthomonadales	Xanthomonadaceae	Thermomonas	0.36 ± 0.36	0.82 ± 0.64	0 ± 0	0 ± 0	1/11	2/11	0/11	0/10
ASV 705	Proteobacteria	Alphaproteobacteria	Caulobacterales	Caulobacteraceae	Brevundimonas	0.09 ± 0.09	0.73 ± 0.73	0 ± 0	0 ± 0	1/11	1/11	0/11	0/10
ASV 709	Bacteroidetes	Bacteroidia	Flavobacteriales	Weeksellaceae	Chryseobacterium	0 ± 0	0 ± 0	0.36 ± 0.36	0 ± 0	0/11	0/11	1/11	0/10
ASV 712	Proteobacteria	Gammaproteobacteria	Betaproteobacteriales	Burkholderiaceae	NA	0 ± 0	0 ± 0	0 ± 0	0.6 ± 0.4	0/11	0/11	0/11	2/10
ASV 713	Proteobacteria	Alphaproteobacteria	Caulobacterales	Caulobacteraceae	Brevundimonas	0.09 ± 0.09	0.91 ± 0.91	0 ± 0	0 ± 0	1/11	1/11	0/11	0/10
ASV 717	Proteobacteria	Gammaproteobacteria	Xanthomonadales	Xanthomonadaceae	Pseudoxanthomonas	1.09 ± 1	0.36 ± 0.28	0 ± 0	0 ± 0	2/11	2/11	0/11	0/10
ASV 719	Bacteroidetes	Bacteroidia	Sphingobacteriales	Sphingobacteriaceae	Sphingobacterium	0 ± 0	0 ± 0	0 ± 0	0.4 ± 0.4	0/11	0/11	0/11	1/10
ASV 722	Bacteroidetes	Bacteroidia	Flavobacteriales	Flavobacteriaceae	NA	0 ± 0	0 ± 0	0.18 ± 0.18	0 ± 0	0/11	0/11	1/11	0/10
ASV 724	Proteobacteria	Gammaproteobacteria	Enterobacteriales	Enterobacteriaceae	NA	0 ± 0	0 ± 0	0 ± 0	1.8 ± 1.8	0/11	0/11	0/11	1/10
ASV 729	Proteobacteria	Alphaproteobacteria	Caulobacterales	Caulobacteraceae	Phenylobacterium	0.18 ± 0.12	0.45 ± 0.28	0.18 ± 0.18	0 ± 0	2/11	3/11	1/11	0/10
ASV 730	Bacteroidetes	Bacteroidia	Flavobacteriales	Weeksellaceae	Chryseobacterium	0.27 ± 0.27	0.91 ± 0.62	0 ± 0	0.3 ± 0.3	1/11	2/11	0/11	1/10
ASV 731	Proteobacteria	Alphaproteobacteria	Sphingomonadales	Sphingomonadaceae	Novosphingobium	0 ± 0	0.18 ± 0.12	0 ± 0	0.8 ± 0.42	0/11	2/11	0/11	4/10
ASV 732	Bacteroidetes	Bacteroidia	Flavobacteriales	Weeksellaceae	Chryseobacterium	0 ± 0	0 ± 0	0.36 ± 0.36	0 ± 0	0/11	0/11	1/11	0/10
ASV 734	Proteobacteria	Alphaproteobacteria	Rickettsiales	Anaplasmataceae	Wolbachia	0 ± 0	0 ± 0	0.55 ± 0.37	0.6 ± 0.4	0/11	0/11	2/11	2/10
ASV 737	Bacteroidetes	Bacteroidia	Cytophagales	Spirosomaceae	Dyadobacter	0.09 ± 0.09	0 ± 0	0.09 ± 0.09	0.2 ± 0.2	1/11	0/11	1/11	1/10
ASV 739	Bacteroidetes	Bacteroidia	Chitinophagales	Chitinophagaceae	Taibaiella	0.45 ± 0.31	0.73 ± 0.51	0 ± 0	0 ± 0	2/11	2/11	0/11	0/10
ASV 741	Proteobacteria	Alphaproteobacteria	Sphingomonadales	Sphingomonadaceae	Sphingomonas	0.09 ± 0.09	0.09 ± 0.09	0.18 ± 0.18	0.1 ± 0.1	1/11	1/11	1/11	1/10
ASV 749	Proteobacteria	Alphaproteobacteria	Rickettsiales	Anaplasmataceae	Wolbachia	0 ± 0	0 ± 0	0.36 ± 0.36	0.9 ± 0.6	0/11	0/11	1/11	2/10
ASV 750	Bacteroidetes	Bacteroidia	Sphingobacteriales	Sphingobacteriaceae	Parapedobacter	0.27 ± 0.27	0.45 ± 0.45	0 ± 0	0.1 ± 0.1	1/11	1/11	0/11	1/10
ASV 757	Bacteroidetes	Bacteroidia	Flavobacteriales	Flavobacteriaceae	NA	0 ± 0	0 ± 0	0.18 ± 0.18	0 ± 0	0/11	0/11	1/11	0/10
ASV 758	Bacteroidetes	Bacteroidia	Sphingobacteriales	Sphingobacteriaceae	Sphingobacterium	0.45 ± 0.31	0.27 ± 0.14	0 ± 0	0.1 ± 0.1	2/11	3/11	0/11	1/10
ASV 763	Bacteroidetes	Bacteroidia	Chitinophagales	Chitinophagaceae	NA	0 ± 0	0.18 ± 0.18	0 ± 0	0 ± 0	0/11	1/11	0/11	0/10
ASV 769	Proteobacteria	Alphaproteobacteria	Caulobacterales	Caulobacteraceae	Phenylobacterium	0.27 ± 0.14	0.45 ± 0.37	0 ± 0	0.1 ± 0.1	3/11	2/11	0/11	1/10
ASV 771	Proteobacteria	Alphaproteobacteria	Caulobacterales	Caulobacteraceae	Brevundimonas	0.18 ± 0.18	0.27 ± 0.19	0 ± 0	0.4 ± 0.31	1/11	2/11	0/11	2/10
ASV 776	Proteobacteria	Gammaproteobacteria	Xanthomonadales	Xanthomonadaceae	Pseudoxanthomonas	0.91 ± 0.91	0.18 ± 0.18	0 ± 0	0 ± 0	1/11	1/11	0/11	0/10
ASV 777	Proteobacteria	Gammaproteobacteria	Betaproteobacteriales	Burkholderiaceae	NA	0 ± 0	0 ± 0	0 ± 0	0.5 ± 0.34	0/11	0/11	0/11	2/10
ASV 778	Proteobacteria	Alphaproteobacteria	Caulobacterales	Caulobacteraceae	Phenylobacterium	0.09 ± 0.09	0.27 ± 0.19	0 ± 0	0 ± 0	1/11	2/11	0/11	0/10
ASV 785	Bacteroidetes	Bacteroidia	Chitinophagales	Chitinophagaceae	NA	0 ± 0	0 ± 0	0 ± 0	0.7 ± 0.7	0/11	0/11	0/11	1/10
ASV 786	Bacteroidetes	Bacteroidia	Sphingobacteriales	Sphingobacteriaceae	Parapedobacter	0.64 ± 0.36	0.27 ± 0.27	0 ± 0	0 ± 0	3/11	1/11	0/11	0/10
ASV 789	Bacteroidetes	Bacteroidia	Sphingobacteriales	Sphingobacteriaceae	Sphingobacterium	0.45 ± 0.21	0.55 ± 0.37	0 ± 0	0 ± 0	4/11	3/11	0/11	0/10
ASV 793	Proteobacteria	Gammaproteobacteria	Gammaproteobacteria_Incertae_Sedis	Unknown_Family	Acidibacter	0 ± 0	0.18 ± 0.18	0 ± 0	0 ± 0	0/11	1/11	0/11	0/10
ASV 794	Proteobacteria	Alphaproteobacteria	Rhizobiales	Xanthobacteraceae	Bradyrhizobium	0.09 ± 0.09	0.45 ± 0.25	0 ± 0	0 ± 0	1/11	3/11	0/11	0/10
ASV 796	Proteobacteria	Alphaproteobacteria	Sphingomonadales	Sphingomonadaceae	Novosphingobium	0.27 ± 0.19	0.09 ± 0.09	0 ± 0	0 ± 0	2/11	1/11	0/11	0/10
ASV 800	Bacteroidetes	Bacteroidia	Sphingobacteriales	Sphingobacteriaceae	Sphingobacterium	0.45 ± 0.31	0.27 ± 0.14	0 ± 0	0.1 ± 0.1	2/11	3/11	0/11	1/10
ASV 804	Bacteroidetes	Bacteroidia	Sphingobacteriales	Sphingobacteriaceae	Parapedobacter	0 ± 0	0.36 ± 0.36	0 ± 0	0 ± 0	0/11	1/11	0/11	0/10
ASV 807	Proteobacteria	Gammaproteobacteria	Pseudomonadales	Pseudomonadaceae	Pseudomonas	0 ± 0	0 ± 0	0.27 ± 0.27	0 ± 0	0/11	0/11	1/11	0/10
ASV 812	Proteobacteria	Alphaproteobacteria	Rhizobiales	Xanthobacteraceae	Bradyrhizobium	0 ± 0	0.45 ± 0.31	0 ± 0	0.1 ± 0.1	0/11	2/11	0/11	1/10
ASV 813	Proteobacteria	Alphaproteobacteria	Rhizobiales	Rhizobiaceae	Paenochrobactrum	0 ± 0	0 ± 0	0 ± 0	1.2 ± 1.2	0/11	0/11	0/11	1/10
ASV 814	Bacteroidetes	Bacteroidia	Sphingobacteriales	Sphingobacteriaceae	Sphingobacterium	0.18 ± 0.18	0.27 ± 0.19	0 ± 0	0.1 ± 0.1	1/11	2/11	0/11	1/10
ASV 815	Bacteroidetes	Bacteroidia	Sphingobacteriales	Sphingobacteriaceae	Sphingobacterium	0.45 ± 0.31	0.36 ± 0.28	0 ± 0	0 ± 0	2/11	2/11	0/11	0/10
ASV 816	Proteobacteria	Alphaproteobacteria	Sphingomonadales	Sphingomonadaceae	Sphingopyxis	0.18 ± 0.18	0.55 ± 0.39	0 ± 0	0.2 ± 0.2	1/11	2/11	0/11	1/10
ASV 820	Bacteroidetes	Bacteroidia	Chitinophagales	Chitinophagaceae	Sediminibacterium	0.09 ± 0.09	0 ± 0	0 ± 0	0.2 ± 0.2	1/11	0/11	0/11	1/10
ASV 824	Bacteroidetes	Bacteroidia	Chitinophagales	Chitinophagaceae	Taibaiella	0 ± 0	0.73 ± 0.51	0 ± 0	0 ± 0	0/11	2/11	0/11	0/10
ASV 825	Bacteroidetes	Bacteroidia	Flavobacteriales	Weeksellaceae	Chryseobacterium	0 ± 0	0 ± 0	0 ± 0	0.9 ± 0.69	0/11	0/11	0/11	3/10
ASV 827	Proteobacteria	Gammaproteobacteria	Betaproteobacteriales	Burkholderiaceae	Delftia	0 ± 0	0.18 ± 0.18	0 ± 0	0.5 ± 0.31	0/11	1/11	0/11	3/10
ASV 828	Proteobacteria	Alphaproteobacteria	Rhizobiales	Rhizobiaceae	Aquamicrobium	0 ± 0	0.18 ± 0.18	0 ± 0	0.7 ± 0.7	0/11	1/11	0/11	1/10
ASV 833	Proteobacteria	Gammaproteobacteria	Betaproteobacteriales	Burkholderiaceae	Delftia	0 ± 0	0.09 ± 0.09	0.09 ± 0.09	0 ± 0	0/11	1/11	1/11	0/10
ASV 836	Bacteroidetes	Bacteroidia	Sphingobacteriales	Sphingobacteriaceae	Sphingobacterium	0.09 ± 0.09	0.09 ± 0.09	0.18 ± 0.18	0 ± 0	1/11	1/11	1/11	0/10
ASV 837	Verrucomicrobia	Verrucomicrobiae	Verrucomicrobiales	Verrucomicrobiaceae	Verrucomicrobium	0.55 ± 0.55	0 ± 0	0 ± 0	0 ± 0	1/11	0/11	0/11	0/10
ASV 839	Bacteroidetes	Bacteroidia	Sphingobacteriales	Sphingobacteriaceae	Sphingobacterium	0.18 ± 0.12	0.18 ± 0.18	0.09 ± 0.09	0 ± 0	2/11	1/11	1/11	0/10
ASV 840	Bacteroidetes	Bacteroidia	Chitinophagales	NA	NA	0 ± 0	0 ± 0	0 ± 0	0.7 ± 0.7	0/11	0/11	0/11	1/10
ASV 842	Proteobacteria	Alphaproteobacteria	Sphingomonadales	Sphingomonadaceae	Sphingopyxis	0.27 ± 0.27	0.18 ± 0.12	0 ± 0	0 ± 0	1/11	2/11	0/11	0/10
ASV 843	Bacteroidetes	Bacteroidia	Sphingobacteriales	Sphingobacteriaceae	Sphingobacterium	0.18 ± 0.18	0.18 ± 0.18	0 ± 0	0.2 ± 0.13	1/11	1/11	0/11	2/10
ASV 845	Bacteroidetes	Bacteroidia	Sphingobacteriales	Sphingobacteriaceae	Sphingobacterium	0.18 ± 0.12	0.18 ± 0.18	0.18 ± 0.18	0.1 ± 0.1	2/11	1/11	1/11	1/10
ASV 846	Bacteroidetes	Bacteroidia	Sphingobacteriales	Sphingobacteriaceae	Parapedobacter	0.55 ± 0.31	0.36 ± 0.36	0 ± 0	0 ± 0	3/11	1/11	0/11	0/10
ASV 847	Proteobacteria	Alphaproteobacteria	Rhizobiales	Xanthobacteraceae	Bradyrhizobium	0 ± 0	0.27 ± 0.27	0 ± 0	0 ± 0	0/11	1/11	0/11	0/10
ASV 849	Bacteroidetes	Bacteroidia	Flavobacteriales	Weeksellaceae	Moheibacter	0.36 ± 0.24	0.27 ± 0.19	0 ± 0	0 ± 0	2/11	2/11	0/11	0/10
ASV 850	Proteobacteria	Alphaproteobacteria	Sphingomonadales	Sphingomonadaceae	Sphingopyxis	0.09 ± 0.09	0.09 ± 0.09	0 ± 0	0 ± 0	1/11	1/11	0/11	0/10
ASV 851	Proteobacteria	Alphaproteobacteria	Rhizobiales	Devosiaceae	Devosia	0.36 ± 0.24	0.45 ± 0.25	0 ± 0	0 ± 0	2/11	3/11	0/11	0/10
ASV 852	Proteobacteria	Alphaproteobacteria	Rhizobiales	Rhizobiaceae	Paenochrobactrum	0 ± 0	0 ± 0	0 ± 0	0.9 ± 0.9	0/11	0/11	0/11	1/10
ASV 855	Proteobacteria	Alphaproteobacteria	Caulobacterales	Caulobacteraceae	Brevundimonas	0.55 ± 0.31	0 ± 0	0 ± 0	0 ± 0	3/11	0/11	0/11	0/10
ASV 856	Proteobacteria	Gammaproteobacteria	Betaproteobacteriales	Burkholderiaceae	Delftia	0 ± 0	0 ± 0	0.09 ± 0.09	0 ± 0	0/11	0/11	1/11	0/10
ASV 858	Gemmatimonadetes	Gemmatimonadetes	Gemmatimonadales	Gemmatimonadaceae	NA	0.82 ± 0.82	0 ± 0	0 ± 0	0.1 ± 0.1	1/11	0/11	0/11	1/10
ASV 859	Bacteroidetes	Bacteroidia	Flavobacteriales	Weeksellaceae	Chryseobacterium	0.09 ± 0.09	0 ± 0	0 ± 0	0.7 ± 0.52	1/11	0/11	0/11	2/10
ASV 861	Bacteroidetes	Bacteroidia	Flavobacteriales	Weeksellaceae	Chryseobacterium	0 ± 0	0 ± 0	0 ± 0	0.9 ± 0.5	0/11	0/11	0/11	4/10
ASV 863	Proteobacteria	Gammaproteobacteria	Pseudomonadales	Pseudomonadaceae	Pseudomonas	0 ± 0	0 ± 0	0.09 ± 0.09	0 ± 0	0/11	0/11	1/11	0/10
ASV 866	Gemmatimonadetes	Gemmatimonadetes	Gemmatimonadales	Gemmatimonadaceae	NA	0.09 ± 0.09	0.64 ± 0.64	0 ± 0	0 ± 0	1/11	1/11	0/11	0/10
ASV 871	Proteobacteria	Alphaproteobacteria	Rhizobiales	Rhizobiaceae	Aquamicrobium	0.18 ± 0.12	0.45 ± 0.45	0 ± 0	0 ± 0	2/11	1/11	0/11	0/10
ASV 873	Proteobacteria	Gammaproteobacteria	Betaproteobacteriales	Burkholderiaceae	Delftia	0.18 ± 0.18	0 ± 0	0 ± 0	0.8 ± 0.51	1/11	0/11	0/11	3/10
ASV 874	Proteobacteria	Alphaproteobacteria	Caulobacterales	Caulobacteraceae	Phenylobacterium	0.18 ± 0.18	0.36 ± 0.28	0 ± 0	0.4 ± 0.27	1/11	2/11	0/11	2/10
ASV 875	Proteobacteria	Gammaproteobacteria	Pseudomonadales	Pseudomonadaceae	Pseudomonas	0.09 ± 0.09	0 ± 0	0.36 ± 0.28	0 ± 0	1/11	0/11	2/11	0/10
ASV 879	Proteobacteria	Alphaproteobacteria	Rhizobiales	Kaistiaceae	Kaistia	0.27 ± 0.27	0.64 ± 0.64	0 ± 0	0 ± 0	1/11	1/11	0/11	0/10
ASV 880	Proteobacteria	Alphaproteobacteria	Rhizobiales	Devosiaceae	Devosia	0.45 ± 0.28	0.27 ± 0.19	0 ± 0	0 ± 0	3/11	2/11	0/11	0/10
ASV 884	Proteobacteria	Alphaproteobacteria	Sphingomonadales	Sphingomonadaceae	Sphingomonas	0 ± 0	0 ± 0	0.18 ± 0.18	0.1 ± 0.1	0/11	0/11	1/11	1/10
ASV 894	Gemmatimonadetes	Gemmatimonadetes	Gemmatimonadales	Gemmatimonadaceae	NA	0 ± 0	0.36 ± 0.36	0 ± 0	0 ± 0	0/11	1/11	0/11	0/10
ASV 900	Proteobacteria	Gammaproteobacteria	Pseudomonadales	Pseudomonadaceae	Pseudomonas	0.18 ± 0.18	0 ± 0	0.09 ± 0.09	0 ± 0	1/11	0/11	1/11	0/10
ASV 903	Bacteroidetes	Bacteroidia	Sphingobacteriales	Sphingobacteriaceae	Sphingobacterium	0.64 ± 0.47	0.09 ± 0.09	0 ± 0	0 ± 0	2/11	1/11	0/11	0/10
ASV 904	Bacteroidetes	Bacteroidia	Sphingobacteriales	Sphingobacteriaceae	Arcticibacter	0.18 ± 0.18	0 ± 0	0 ± 0	0 ± 0	1/11	0/11	0/11	0/10
ASV 906	Bacteroidetes	Bacteroidia	Cytophagales	Spirosomaceae	Dyadobacter	0 ± 0	0 ± 0	0.09 ± 0.09	0.3 ± 0.21	0/11	0/11	1/11	2/10
ASV 908	Bacteroidetes	Bacteroidia	Flavobacteriales	Weeksellaceae	Moheibacter	0.36 ± 0.36	0 ± 0	0 ± 0	0 ± 0	1/11	0/11	0/11	0/10
ASV 910	Proteobacteria	Alphaproteobacteria	Rhizobiales	Rhizobiaceae	Allorhizobium-Neorhizobium-Pararhizobium-Rhizobium	0.18 ± 0.18	0.55 ± 0.31	0 ± 0	0.2 ± 0.2	1/11	3/11	0/11	1/10
ASV 914	Bacteroidetes	Bacteroidia	Sphingobacteriales	Sphingobacteriaceae	Pedobacter	0.55 ± 0.39	0.27 ± 0.19	0 ± 0	0 ± 0	2/11	2/11	0/11	0/10
ASV 915	Gemmatimonadetes	Gemmatimonadetes	Gemmatimonadales	Gemmatimonadaceae	NA	0.64 ± 0.64	0 ± 0	0.09 ± 0.09	0 ± 0	1/11	0/11	1/11	0/10
ASV 917	Bacteroidetes	Bacteroidia	Flavobacteriales	Weeksellaceae	Moheibacter	0 ± 0	0.45 ± 0.37	0 ± 0	0.2 ± 0.2	0/11	2/11	0/11	1/10
ASV 921	Bacteroidetes	Bacteroidia	Sphingobacteriales	Sphingobacteriaceae	Pedobacter	0.64 ± 0.47	0.09 ± 0.09	0 ± 0	0 ± 0	2/11	1/11	0/11	0/10
ASV 923	Proteobacteria	Gammaproteobacteria	Pseudomonadales	Moraxellaceae	Alkanindiges	0.18 ± 0.12	0.55 ± 0.55	0 ± 0	0 ± 0	2/11	1/11	0/11	0/10
ASV 928	Bacteroidetes	Bacteroidia	Flavobacteriales	Weeksellaceae	Moheibacter	0.36 ± 0.36	0 ± 0	0 ± 0	0 ± 0	1/11	0/11	0/11	0/10
ASV 934	Proteobacteria	Gammaproteobacteria	Pseudomonadales	Pseudomonadaceae	Pseudomonas	0 ± 0	0 ± 0	0 ± 0	0.6 ± 0.5	0/11	0/11	0/11	2/10
ASV 937	Proteobacteria	Alphaproteobacteria	Rhizobiales	Kaistiaceae	Kaistia	0.18 ± 0.18	0.55 ± 0.55	0 ± 0	0 ± 0	1/11	1/11	0/11	0/10
ASV 942	Bacteroidetes	Bacteroidia	Flavobacteriales	Weeksellaceae	Moheibacter	0 ± 0	0.45 ± 0.31	0 ± 0	0 ± 0	0/11	2/11	0/11	0/10
ASV 943	Proteobacteria	Alphaproteobacteria	Rhizobiales	Rhizobiaceae	Aquamicrobium	0 ± 0	0 ± 0	0 ± 0	0.7 ± 0.7	0/11	0/11	0/11	1/10
ASV 946	Bacteroidetes	Bacteroidia	Sphingobacteriales	Sphingobacteriaceae	Pedobacter	0.36 ± 0.24	0.09 ± 0.09	0 ± 0	0 ± 0	2/11	1/11	0/11	0/10
ASV 949	Proteobacteria	Alphaproteobacteria	Caulobacterales	Caulobacteraceae	Brevundimonas	0.64 ± 0.47	0.18 ± 0.18	0 ± 0	0 ± 0	2/11	1/11	0/11	0/10
ASV 954	Gemmatimonadetes	Gemmatimonadetes	Gemmatimonadales	Gemmatimonadaceae	NA	0 ± 0	0.45 ± 0.37	0.09 ± 0.09	0 ± 0	0/11	2/11	1/11	0/10
ASV 960	Gemmatimonadetes	Gemmatimonadetes	Gemmatimonadales	Gemmatimonadaceae	NA	0.64 ± 0.43	0 ± 0	0 ± 0	0 ± 0	2/11	0/11	0/11	0/10
ASV 962	Proteobacteria	Gammaproteobacteria	Pseudomonadales	Pseudomonadaceae	Pseudomonas	0 ± 0	0 ± 0	0 ± 0	0.6 ± 0.6	0/11	0/11	0/11	1/10
ASV 964	Proteobacteria	Alphaproteobacteria	Caulobacterales	Caulobacteraceae	Brevundimonas	0.09 ± 0.09	0.18 ± 0.18	0 ± 0	0.3 ± 0.3	1/11	1/11	0/11	1/10
ASV 969	Proteobacteria	Gammaproteobacteria	Betaproteobacteriales	Burkholderiaceae	Lampropedia	0.36 ± 0.36	0 ± 0	0 ± 0	0 ± 0	1/11	0/11	0/11	0/10
ASV 972	Proteobacteria	Alphaproteobacteria	Rhizobiales	Devosiaceae	Devosia	0.18 ± 0.12	0.27 ± 0.19	0 ± 0	0 ± 0	2/11	2/11	0/11	0/10
ASV 973	Bacteroidetes	Bacteroidia	Sphingobacteriales	Sphingobacteriaceae	Parapedobacter	0 ± 0	0.64 ± 0.64	0 ± 0	0.1 ± 0.1	0/11	1/11	0/11	1/10
ASV 977	Proteobacteria	Alphaproteobacteria	Rhizobiales	Rhizobiaceae	Allorhizobium-Neorhizobium-Pararhizobium-Rhizobium	0.27 ± 0.27	0.27 ± 0.14	0 ± 0	0.2 ± 0.2	1/11	3/11	0/11	1/10
ASV 978	Bacteroidetes	Bacteroidia	Sphingobacteriales	Sphingobacteriaceae	Sphingobacterium	0.45 ± 0.31	0.09 ± 0.09	0 ± 0	0 ± 0	2/11	1/11	0/11	0/10
ASV 979	Bacteroidetes	Bacteroidia	Flavobacteriales	Weeksellaceae	Chryseobacterium	0.09 ± 0.09	0 ± 0	0 ± 0	0 ± 0	1/11	0/11	0/11	0/10
ASV 983	Proteobacteria	Gammaproteobacteria	Pseudomonadales	Pseudomonadaceae	Pseudomonas	0 ± 0	0 ± 0	0 ± 0	0.9 ± 0.9	0/11	0/11	0/11	1/10
ASV 987	Bacteroidetes	Bacteroidia	Sphingobacteriales	Sphingobacteriaceae	Sphingobacterium	0.09 ± 0.09	0 ± 0	0 ± 0	0.3 ± 0.21	1/11	0/11	0/11	2/10
ASV 988	Proteobacteria	Gammaproteobacteria	Betaproteobacteriales	Burkholderiaceae	NA	0 ± 0	0 ± 0	0 ± 0	0.2 ± 0.2	0/11	0/11	0/11	1/10
ASV 989	Proteobacteria	Alphaproteobacteria	Sphingomonadales	Sphingomonadaceae	Sphingobium	0.09 ± 0.09	0.45 ± 0.37	0 ± 0	0 ± 0	1/11	2/11	0/11	0/10
ASV 990	Firmicutes	Bacilli	Bacillales	Staphylococcaceae	Staphylococcus	0.18 ± 0.18	0.45 ± 0.45	0 ± 0	0 ± 0	1/11	1/11	0/11	0/10
ASV 991	Proteobacteria	Alphaproteobacteria	Sphingomonadales	Sphingomonadaceae	Novosphingobium	0.18 ± 0.18	0.18 ± 0.18	0 ± 0	0 ± 0	1/11	1/11	0/11	0/10
ASV 992	Bacteroidetes	Bacteroidia	Cytophagales	Hymenobacteraceae	Pontibacter	0 ± 0	0.55 ± 0.55	0 ± 0	0 ± 0	0/11	1/11	0/11	0/10
ASV 995	Proteobacteria	Deltaproteobacteria	Bdellovibrionales	Bacteriovoracaceae	Peredibacter	0 ± 0	0 ± 0	0.18 ± 0.18	0 ± 0	0/11	0/11	1/11	0/10
ASV 997	Proteobacteria	Alphaproteobacteria	Rhizobiales	Kaistiaceae	Kaistia	0 ± 0	0 ± 0	0 ± 0	0.7 ± 0.7	0/11	0/11	0/11	1/10
ASV 999	Firmicutes	Bacilli	Bacillales	Bacillaceae	Bacillus	0 ± 0	0 ± 0	0 ± 0	0.4 ± 0.4	0/11	0/11	0/11	1/10
ASV 1000	Bacteroidetes	Bacteroidia	Sphingobacteriales	Sphingobacteriaceae	Parapedobacter	0 ± 0	0.55 ± 0.55	0 ± 0	0 ± 0	0/11	1/11	0/11	0/10
ASV 1005	Bacteroidetes	Bacteroidia	Sphingobacteriales	Sphingobacteriaceae	Arcticibacter	0.09 ± 0.09	0 ± 0	0 ± 0	0 ± 0	1/11	0/11	0/11	0/10
ASV 1006	Firmicutes	Bacilli	Bacillales	Paenibacillaceae	Paenibacillus	0 ± 0	0.36 ± 0.36	0 ± 0	0 ± 0	0/11	1/11	0/11	0/10
ASV 1007	Verrucomicrobia	Verrucomicrobiae	Verrucomicrobiales	Verrucomicrobiaceae	Verrucomicrobium	0.36 ± 0.36	0 ± 0	0 ± 0	0 ± 0	1/11	0/11	0/11	0/10
ASV 1012	Bacteroidetes	Bacteroidia	Sphingobacteriales	Sphingobacteriaceae	Parapedobacter	0 ± 0	0.36 ± 0.36	0 ± 0	0.1 ± 0.1	0/11	1/11	0/11	1/10
ASV 1017	Firmicutes	Clostridia	Clostridiales	Lachnospiraceae	Anaerocolumna	0 ± 0	0.27 ± 0.27	0.09 ± 0.09	0 ± 0	0/11	1/11	1/11	0/10
ASV 1020	Bacteroidetes	Bacteroidia	Sphingobacteriales	Sphingobacteriaceae	Sphingobacterium	0 ± 0	0 ± 0	0 ± 0	0.6 ± 0.6	0/11	0/11	0/11	1/10
ASV 1023	Bacteroidetes	Bacteroidia	Chitinophagales	Chitinophagaceae	Niabella	0.55 ± 0.39	0 ± 0	0 ± 0	0 ± 0	2/11	0/11	0/11	0/10
ASV 1028	Proteobacteria	Alphaproteobacteria	Rhizobiales	Devosiaceae	Devosia	0.27 ± 0.19	0.18 ± 0.18	0 ± 0	0.2 ± 0.2	2/11	1/11	0/11	1/10
ASV 1029	Bacteroidetes	Bacteroidia	Chitinophagales	Chitinophagaceae	Niabella	0.82 ± 0.58	0 ± 0	0 ± 0	0 ± 0	2/11	0/11	0/11	0/10
ASV 1030	Bacteroidetes	Bacteroidia	Sphingobacteriales	Sphingobacteriaceae	Sphingobacterium	0.27 ± 0.19	0 ± 0	0 ± 0	0 ± 0	2/11	0/11	0/11	0/10
ASV 1032	Bacteroidetes	Bacteroidia	Sphingobacteriales	Sphingobacteriaceae	Sphingobacterium	0.09 ± 0.09	0.45 ± 0.31	0 ± 0	0 ± 0	1/11	2/11	0/11	0/10
ASV 1033	Gemmatimonadetes	Gemmatimonadetes	Gemmatimonadales	Gemmatimonadaceae	NA	0 ± 0	0.45 ± 0.45	0 ± 0	0 ± 0	0/11	1/11	0/11	0/10
ASV 1036	Proteobacteria	Alphaproteobacteria	Rhizobiales	Rhizobiaceae	Aquamicrobium	0.09 ± 0.09	0.45 ± 0.45	0 ± 0	0 ± 0	1/11	1/11	0/11	0/10
ASV 1040	Gemmatimonadetes	Gemmatimonadetes	Gemmatimonadales	Gemmatimonadaceae	NA	0.55 ± 0.39	0.09 ± 0.09	0 ± 0	0 ± 0	2/11	1/11	0/11	0/10
ASV 1041	Proteobacteria	Gammaproteobacteria	Enterobacteriales	Enterobacteriaceae	Plesiomonas	0 ± 0	0 ± 0	0 ± 0	0.6 ± 0.6	0/11	0/11	0/11	1/10
ASV 1045	Bacteroidetes	Bacteroidia	Sphingobacteriales	Sphingobacteriaceae	Pedobacter	0.36 ± 0.28	0.18 ± 0.18	0 ± 0	0 ± 0	2/11	1/11	0/11	0/10
ASV 1046	Bacteroidetes	Bacteroidia	Sphingobacteriales	Sphingobacteriaceae	Parapedobacter	0 ± 0	0.36 ± 0.36	0 ± 0	0 ± 0	0/11	1/11	0/11	0/10
ASV 1053	Bacteroidetes	Bacteroidia	Sphingobacteriales	Sphingobacteriaceae	Sphingobacterium	0.64 ± 0.43	0 ± 0	0 ± 0	0 ± 0	2/11	0/11	0/11	0/10
ASV 1057	Bacteroidetes	Bacteroidia	Flavobacteriales	Flavobacteriaceae	NA	0.36 ± 0.28	0.36 ± 0.36	0 ± 0	0 ± 0	2/11	1/11	0/11	0/10
ASV 1060	Proteobacteria	Gammaproteobacteria	Pseudomonadales	Pseudomonadaceae	Pseudomonas	0 ± 0	0 ± 0	0 ± 0	0.5 ± 0.5	0/11	0/11	0/11	1/10
ASV 1061	Bacteroidetes	Bacteroidia	Flavobacteriales	Weeksellaceae	Chryseobacterium	0 ± 0	0 ± 0	0 ± 0	0.5 ± 0.5	0/11	0/11	0/11	1/10
ASV 1067	Bacteroidetes	Bacteroidia	Sphingobacteriales	Sphingobacteriaceae	Sphingobacterium	0 ± 0	0.18 ± 0.18	0 ± 0	0 ± 0	0/11	1/11	0/11	0/10
ASV 1068	Proteobacteria	Alphaproteobacteria	Rhizobiales	Kaistiaceae	Kaistia	0 ± 0	0 ± 0	0 ± 0	0.8 ± 0.8	0/11	0/11	0/11	1/10
ASV 1069	Bacteroidetes	Bacteroidia	Sphingobacteriales	Sphingobacteriaceae	Sphingobacterium	0 ± 0	0 ± 0	0 ± 0	0.5 ± 0.5	0/11	0/11	0/11	1/10
ASV 1072	Bacteroidetes	Bacteroidia	Sphingobacteriales	Sphingobacteriaceae	Sphingobacterium	0.18 ± 0.18	0 ± 0	0 ± 0	0 ± 0	1/11	0/11	0/11	0/10
ASV 1074	Bacteroidetes	Bacteroidia	Cytophagales	Spirosomaceae	Dyadobacter	0.18 ± 0.18	0.27 ± 0.19	0 ± 0	0 ± 0	1/11	2/11	0/11	0/10
ASV 1075	Bacteroidetes	Bacteroidia	Sphingobacteriales	Sphingobacteriaceae	Sphingobacterium	0.09 ± 0.09	0.36 ± 0.36	0 ± 0	0 ± 0	1/11	1/11	0/11	0/10
ASV 1080	Proteobacteria	Gammaproteobacteria	Pseudomonadales	Moraxellaceae	Acinetobacter	0 ± 0	0 ± 0	0 ± 0	0.4 ± 0.27	0/11	0/11	0/11	2/10
ASV 1088	Bacteroidetes	Bacteroidia	Sphingobacteriales	Sphingobacteriaceae	Sphingobacterium	0.18 ± 0.18	0 ± 0	0 ± 0	0.2 ± 0.2	1/11	0/11	0/11	1/10
ASV 1092	Firmicutes	Bacilli	Bacillales	Bacillaceae	Bacillus	0 ± 0	0 ± 0	0 ± 0	0.3 ± 0.3	0/11	0/11	0/11	1/10
ASV 1094	Proteobacteria	Alphaproteobacteria	Rhizobiales	Devosiaceae	Devosia	0 ± 0	0.36 ± 0.36	0 ± 0	0 ± 0	0/11	1/11	0/11	0/10
ASV 1101	Proteobacteria	Gammaproteobacteria	Pseudomonadales	Moraxellaceae	Alkanindiges	0 ± 0	0.45 ± 0.37	0 ± 0	0 ± 0	0/11	2/11	0/11	0/10
ASV 1108	Bacteroidetes	Bacteroidia	Sphingobacteriales	Sphingobacteriaceae	Pedobacter	0.45 ± 0.45	0 ± 0	0 ± 0	0 ± 0	1/11	0/11	0/11	0/10
ASV 1109	Proteobacteria	Alphaproteobacteria	Rhizobiales	Devosiaceae	Devosia	0 ± 0	0.27 ± 0.27	0 ± 0	0 ± 0	0/11	1/11	0/11	0/10
ASV 1111	Proteobacteria	Alphaproteobacteria	Rhizobiales	Rhizobiaceae	Shinella	0.18 ± 0.18	0.27 ± 0.19	0 ± 0	0 ± 0	1/11	2/11	0/11	0/10
ASV 1112	Bacteroidetes	Bacteroidia	Cytophagales	Spirosomaceae	Dyadobacter	0.09 ± 0.09	0.45 ± 0.37	0 ± 0	0 ± 0	1/11	2/11	0/11	0/10
ASV 1113	Bacteroidetes	Bacteroidia	Sphingobacteriales	Sphingobacteriaceae	Sphingobacterium	0 ± 0	0 ± 0	0 ± 0	0.4 ± 0.4	0/11	0/11	0/11	1/10
ASV 1116	Proteobacteria	Alphaproteobacteria	Rhizobiales	Rhizobiaceae	Paenochrobactrum	0 ± 0	0 ± 0	0 ± 0	0.6 ± 0.6	0/11	0/11	0/11	1/10
ASV 1117	Proteobacteria	Alphaproteobacteria	Rhizobiales	Rhizobiaceae	Aureimonas	0 ± 0	0 ± 0	0 ± 0	0.5 ± 0.5	0/11	0/11	0/11	1/10
ASV 1123	Proteobacteria	Alphaproteobacteria	Rhizobiales	Rhizobiaceae	Paenochrobactrum	0 ± 0	0 ± 0	0 ± 0	0.6 ± 0.6	0/11	0/11	0/11	1/10
ASV 1135	Proteobacteria	Alphaproteobacteria	Rhizobiales	Rhizobiaceae	Allorhizobium-Neorhizobium-Pararhizobium-Rhizobium	0.27 ± 0.19	0.18 ± 0.18	0 ± 0	0 ± 0	2/11	1/11	0/11	0/10
ASV 1139	Bacteroidetes	Bacteroidia	Sphingobacteriales	Sphingobacteriaceae	NA	0.09 ± 0.09	0 ± 0	0 ± 0	0 ± 0	1/11	0/11	0/11	0/10
ASV 1140	Firmicutes	Bacilli	Bacillales	Paenibacillaceae	Paenibacillus	0 ± 0	0.45 ± 0.37	0 ± 0	0 ± 0	0/11	2/11	0/11	0/10
ASV 1144	Proteobacteria	Alphaproteobacteria	Rhizobiales	Beijerinckiaceae	Camelimonas	0 ± 0	0 ± 0	0 ± 0	0.3 ± 0.3	0/11	0/11	0/11	1/10
ASV 1147	Verrucomicrobia	Verrucomicrobiae	Verrucomicrobiales	Verrucomicrobiaceae	Verrucomicrobium	0.09 ± 0.09	0.36 ± 0.36	0 ± 0	0 ± 0	1/11	1/11	0/11	0/10
ASV 1152	Bacteroidetes	Bacteroidia	Flavobacteriales	Flavobacteriaceae	Flavobacterium	0.18 ± 0.18	0.27 ± 0.19	0 ± 0	0 ± 0	1/11	2/11	0/11	0/10
ASV 1153	Bacteroidetes	Bacteroidia	Sphingobacteriales	Sphingobacteriaceae	Sphingobacterium	0 ± 0	0.45 ± 0.45	0 ± 0	0 ± 0	0/11	1/11	0/11	0/10
ASV 1154	Bacteroidetes	Bacteroidia	Sphingobacteriales	Sphingobacteriaceae	Pedobacter	0 ± 0	0.45 ± 0.28	0 ± 0	0 ± 0	0/11	3/11	0/11	0/10
ASV 1156	Bacteroidetes	Bacteroidia	Sphingobacteriales	Sphingobacteriaceae	Sphingobacterium	0.18 ± 0.12	0.18 ± 0.18	0 ± 0	0 ± 0	2/11	1/11	0/11	0/10
ASV 1157	Proteobacteria	Alphaproteobacteria	Rhizobiales	Rhizobiaceae	Allorhizobium-Neorhizobium-Pararhizobium-Rhizobium	0.18 ± 0.12	0.18 ± 0.18	0 ± 0	0 ± 0	2/11	1/11	0/11	0/10
ASV 1158	Firmicutes	Bacilli	Bacillales	Staphylococcaceae	Staphylococcus	0 ± 0	0.64 ± 0.64	0 ± 0	0 ± 0	0/11	1/11	0/11	0/10
ASV 1165	Proteobacteria	Alphaproteobacteria	Caulobacterales	Caulobacteraceae	Brevundimonas	0.45 ± 0.31	0 ± 0	0 ± 0	0 ± 0	2/11	0/11	0/11	0/10
ASV 1166	Bacteroidetes	Bacteroidia	Chitinophagales	Chitinophagaceae	Taibaiella	0 ± 0	0.36 ± 0.36	0 ± 0	0 ± 0	0/11	1/11	0/11	0/10
ASV 1167	Proteobacteria	Alphaproteobacteria	Rhizobiales	Rhizobiaceae	Aureimonas	0 ± 0	0 ± 0	0 ± 0	0.5 ± 0.5	0/11	0/11	0/11	1/10
ASV 1169	Proteobacteria	Alphaproteobacteria	Rhizobiales	Devosiaceae	Devosia	0 ± 0	0 ± 0	0 ± 0	0.3 ± 0.3	0/11	0/11	0/11	1/10
ASV 1173	Proteobacteria	Alphaproteobacteria	Rhizobiales	Rhizobiaceae	Allorhizobium-Neorhizobium-Pararhizobium-Rhizobium	0.64 ± 0.28	0 ± 0	0 ± 0	0 ± 0	4/11	0/11	0/11	0/10
ASV 1174	Bacteroidetes	Bacteroidia	Sphingobacteriales	Sphingobacteriaceae	Sphingobacterium	0.09 ± 0.09	0.27 ± 0.27	0 ± 0	0 ± 0	1/11	1/11	0/11	0/10
ASV 1175	Bacteroidetes	Bacteroidia	Sphingobacteriales	Sphingobacteriaceae	Sphingobacterium	0 ± 0	0 ± 0	0 ± 0	0.5 ± 0.5	0/11	0/11	0/11	1/10
ASV 1179	Bacteroidetes	Bacteroidia	Cytophagales	Hymenobacteraceae	Pontibacter	0 ± 0	0.45 ± 0.45	0 ± 0	0 ± 0	0/11	1/11	0/11	0/10
ASV 1180	Bacteroidetes	Bacteroidia	Cytophagales	NA	NA	0 ± 0	0 ± 0	0 ± 0	0.3 ± 0.3	0/11	0/11	0/11	1/10
ASV 1189	Bacteroidetes	Bacteroidia	Flavobacteriales	Weeksellaceae	Moheibacter	0 ± 0	0.27 ± 0.27	0 ± 0	0 ± 0	0/11	1/11	0/11	0/10
ASV 1196	Bacteroidetes	Bacteroidia	Sphingobacteriales	Sphingobacteriaceae	Sphingobacterium	0.09 ± 0.09	0.27 ± 0.27	0 ± 0	0 ± 0	1/11	1/11	0/11	0/10
ASV 1197	Bacteroidetes	Bacteroidia	Sphingobacteriales	Sphingobacteriaceae	Pedobacter	0.27 ± 0.27	0 ± 0	0 ± 0	0 ± 0	1/11	0/11	0/11	0/10
ASV 1198	Bacteroidetes	Bacteroidia	Chitinophagales	Chitinophagaceae	Taibaiella	0 ± 0	0.36 ± 0.36	0 ± 0	0 ± 0	0/11	1/11	0/11	0/10
ASV 1203	Proteobacteria	Gammaproteobacteria	Oceanospirillales	Alcanivoracaceae	Alcanivorax	0.36 ± 0.28	0 ± 0	0 ± 0	0 ± 0	2/11	0/11	0/11	0/10
ASV 1207	Bacteroidetes	Bacteroidia	Flavobacteriales	Weeksellaceae	Chryseobacterium	0 ± 0	0 ± 0	0.09 ± 0.09	0 ± 0	0/11	0/11	1/11	0/10
ASV 1212	Bacteroidetes	Bacteroidia	Sphingobacteriales	Sphingobacteriaceae	Pedobacter	0.36 ± 0.36	0 ± 0	0 ± 0	0 ± 0	1/11	0/11	0/11	0/10
ASV 1213	Bacteroidetes	Bacteroidia	Chitinophagales	Chitinophagaceae	Taibaiella	0.55 ± 0.37	0 ± 0	0 ± 0	0 ± 0	2/11	0/11	0/11	0/10
ASV 1221	Bacteroidetes	Bacteroidia	Sphingobacteriales	Sphingobacteriaceae	Sphingobacterium	0.09 ± 0.09	0 ± 0	0 ± 0	0 ± 0	1/11	0/11	0/11	0/10
ASV 1222	Firmicutes	Bacilli	Lactobacillales	Streptococcaceae	Lactococcus	0.27 ± 0.19	0.18 ± 0.18	0 ± 0	0 ± 0	2/11	1/11	0/11	0/10
ASV 1223	Bacteroidetes	Bacteroidia	Sphingobacteriales	Sphingobacteriaceae	Sphingobacterium	0.09 ± 0.09	0.18 ± 0.18	0 ± 0	0 ± 0	1/11	1/11	0/11	0/10
ASV 1224	Proteobacteria	Alphaproteobacteria	Sphingomonadales	Sphingomonadaceae	Sphingomonas	0 ± 0	0.36 ± 0.28	0 ± 0	0 ± 0	0/11	2/11	0/11	0/10
ASV 1225	Bacteroidetes	Bacteroidia	Sphingobacteriales	Sphingobacteriaceae	Arcticibacter	0 ± 0	0 ± 0	0.09 ± 0.09	0.4 ± 0.31	0/11	0/11	1/11	2/10
ASV 1234	Proteobacteria	Gammaproteobacteria	Oceanospirillales	Alcanivoracaceae	Alcanivorax	0.36 ± 0.28	0 ± 0	0 ± 0	0 ± 0	2/11	0/11	0/11	0/10
ASV 1235	Bacteroidetes	Bacteroidia	Sphingobacteriales	Sphingobacteriaceae	Sphingobacterium	0 ± 0	0 ± 0	0 ± 0	0.4 ± 0.4	0/11	0/11	0/11	1/10
ASV 1243	Proteobacteria	Alphaproteobacteria	Rhizobiales	Devosiaceae	Devosia	0.09 ± 0.09	0.36 ± 0.24	0 ± 0	0 ± 0	1/11	2/11	0/11	0/10
ASV 1250	Proteobacteria	Alphaproteobacteria	Caulobacterales	Caulobacteraceae	Brevundimonas	0 ± 0	0.18 ± 0.18	0 ± 0	0 ± 0	0/11	1/11	0/11	0/10
ASV 1251	Proteobacteria	Alphaproteobacteria	Rhizobiales	Kaistiaceae	Kaistia	0 ± 0	0 ± 0	0 ± 0	0.2 ± 0.2	0/11	0/11	0/11	1/10
ASV 1253	Proteobacteria	Alphaproteobacteria	Sphingomonadales	Sphingomonadaceae	Sphingobium	0 ± 0	0.18 ± 0.18	0 ± 0	0 ± 0	0/11	1/11	0/11	0/10
ASV 1258	Proteobacteria	Alphaproteobacteria	Rhodobacterales	Rhodobacteraceae	Ketogulonicigenium	0 ± 0	0.18 ± 0.18	0 ± 0	0 ± 0	0/11	1/11	0/11	0/10
ASV 1265	Proteobacteria	Alphaproteobacteria	Caulobacterales	Caulobacteraceae	Brevundimonas	0 ± 0	0.36 ± 0.36	0 ± 0	0 ± 0	0/11	1/11	0/11	0/10
ASV 1270	Bacteroidetes	Bacteroidia	Flavobacteriales	Flavobacteriaceae	Flavobacterium	0.45 ± 0.31	0.09 ± 0.09	0 ± 0	0 ± 0	2/11	1/11	0/11	0/10
ASV 1272	Verrucomicrobia	Verrucomicrobiae	Verrucomicrobiales	Verrucomicrobiaceae	Verrucomicrobium	0 ± 0	0.36 ± 0.36	0 ± 0	0 ± 0	0/11	1/11	0/11	0/10
ASV 1273	Proteobacteria	Deltaproteobacteria	Bdellovibrionales	Bacteriovoracaceae	Bacteriovorax	0 ± 0	0.36 ± 0.36	0 ± 0	0 ± 0	0/11	1/11	0/11	0/10
ASV 1274	Proteobacteria	Gammaproteobacteria	Enterobacteriales	Enterobacteriaceae	NA	0 ± 0	0 ± 0	0 ± 0	0.3 ± 0.21	0/11	0/11	0/11	2/10
ASV 1282	Bacteroidetes	Bacteroidia	Chitinophagales	Chitinophagaceae	Niabella	0 ± 0	0.18 ± 0.18	0 ± 0	0 ± 0	0/11	1/11	0/11	0/10
ASV 1294	Bacteroidetes	Bacteroidia	Chitinophagales	Chitinophagaceae	Taibaiella	0.27 ± 0.19	0 ± 0	0 ± 0	0 ± 0	2/11	0/11	0/11	0/10
ASV 1295	Bacteroidetes	Bacteroidia	Chitinophagales	Chitinophagaceae	Taibaiella	0.27 ± 0.19	0 ± 0	0 ± 0	0 ± 0	2/11	0/11	0/11	0/10
ASV 1296	Proteobacteria	Alphaproteobacteria	Rhizobiales	Rhizobiaceae	NA	0 ± 0	0 ± 0	0 ± 0	0.5 ± 0.5	0/11	0/11	0/11	1/10
ASV 1302	Proteobacteria	Gammaproteobacteria	Enterobacteriales	Enterobacteriaceae	Enterobacter	0 ± 0	0 ± 0	0.09 ± 0.09	0 ± 0	0/11	0/11	1/11	0/10
ASV 1303	Bacteroidetes	Bacteroidia	Cytophagales	Cytophagaceae	Sporocytophaga	0 ± 0	0 ± 0	0.27 ± 0.27	0.1 ± 0.1	0/11	0/11	1/11	1/10
ASV 1310	Proteobacteria	Alphaproteobacteria	Rhizobiales	Rhizobiaceae	Shinella	0.09 ± 0.09	0.18 ± 0.18	0 ± 0	0 ± 0	1/11	1/11	0/11	0/10
ASV 1311	Bacteroidetes	Bacteroidia	Sphingobacteriales	Sphingobacteriaceae	Sphingobacterium	0.18 ± 0.18	0.09 ± 0.09	0 ± 0	0 ± 0	1/11	1/11	0/11	0/10
ASV 1312	Proteobacteria	Alphaproteobacteria	Rhizobiales	Kaistiaceae	Kaistia	0 ± 0	0.27 ± 0.19	0 ± 0	0 ± 0	0/11	2/11	0/11	0/10
ASV 1316	Proteobacteria	Alphaproteobacteria	Rhizobiales	Rhizobiaceae	Aminobacter	0 ± 0	0 ± 0	0 ± 0	0.3 ± 0.3	0/11	0/11	0/11	1/10
ASV 1322	Proteobacteria	Alphaproteobacteria	Rhizobiales	Rhizobiaceae	Aminobacter	0 ± 0	0 ± 0	0 ± 0	0.4 ± 0.4	0/11	0/11	0/11	1/10
ASV 1329	Proteobacteria	Gammaproteobacteria	Betaproteobacteriales	Methylophilaceae	Methylotenera	0 ± 0	0.36 ± 0.28	0 ± 0	0 ± 0	0/11	2/11	0/11	0/10
ASV 1331	Proteobacteria	Alphaproteobacteria	Rhizobiales	Rhizobiaceae	NA	0 ± 0	0 ± 0	0 ± 0	0.4 ± 0.4	0/11	0/11	0/11	1/10
ASV 1340	Bacteroidetes	Bacteroidia	Sphingobacteriales	Sphingobacteriaceae	Sphingobacterium	0.36 ± 0.28	0 ± 0	0 ± 0	0 ± 0	2/11	0/11	0/11	0/10
ASV 1341	Bacteroidetes	Bacteroidia	Flavobacteriales	Flavobacteriaceae	Flavobacterium	0 ± 0	0.36 ± 0.24	0 ± 0	0 ± 0	0/11	2/11	0/11	0/10
ASV 1343	Proteobacteria	Deltaproteobacteria	Bdellovibrionales	Bacteriovoracaceae	Peredibacter	0 ± 0	0 ± 0	0.09 ± 0.09	0 ± 0	0/11	0/11	1/11	0/10
ASV 1352	Proteobacteria	Alphaproteobacteria	Caulobacterales	Caulobacteraceae	Brevundimonas	0.55 ± 0.39	0 ± 0	0 ± 0	0 ± 0	2/11	0/11	0/11	0/10
ASV 1354	Bacteroidetes	Bacteroidia	Flavobacteriales	Weeksellaceae	Moheibacter	0 ± 0	0.36 ± 0.36	0 ± 0	0 ± 0	0/11	1/11	0/11	0/10
ASV 1355	Proteobacteria	Gammaproteobacteria	Oceanospirillales	NA	NA	0 ± 0	0.09 ± 0.09	0 ± 0	0.2 ± 0.2	0/11	1/11	0/11	1/10
ASV 1358	Proteobacteria	Alphaproteobacteria	Rhodobacterales	Rhodobacteraceae	Ketogulonicigenium	0 ± 0	0 ± 0	0 ± 0	0.2 ± 0.2	0/11	0/11	0/11	1/10
ASV 1362	Bacteroidetes	Bacteroidia	Flavobacteriales	Flavobacteriaceae	Flavobacterium	0.09 ± 0.09	0.18 ± 0.18	0 ± 0	0 ± 0	1/11	1/11	0/11	0/10
ASV 1363	Bacteroidetes	Bacteroidia	Sphingobacteriales	Sphingobacteriaceae	Arcticibacter	0.09 ± 0.09	0 ± 0	0 ± 0	0.2 ± 0.2	1/11	0/11	0/11	1/10
ASV 1364	Proteobacteria	Deltaproteobacteria	Bdellovibrionales	Bacteriovoracaceae	Bacteriovorax	0 ± 0	0.27 ± 0.27	0 ± 0	0 ± 0	0/11	1/11	0/11	0/10
ASV 1369	Bacteroidetes	Bacteroidia	Sphingobacteriales	Sphingobacteriaceae	Sphingobacterium	0 ± 0	0.18 ± 0.18	0 ± 0	0 ± 0	0/11	1/11	0/11	0/10
ASV 1370	Bacteroidetes	Bacteroidia	Sphingobacteriales	Sphingobacteriaceae	Sphingobacterium	0 ± 0	0 ± 0	0 ± 0	0.2 ± 0.2	0/11	0/11	0/11	1/10
ASV 1383	Proteobacteria	Alphaproteobacteria	Rhizobiales	Devosiaceae	Devosia	0.09 ± 0.09	0.27 ± 0.27	0 ± 0	0 ± 0	1/11	1/11	0/11	0/10
ASV 1384	Bacteroidetes	Bacteroidia	Sphingobacteriales	Sphingobacteriaceae	Sphingobacterium	0 ± 0	0.27 ± 0.19	0 ± 0	0 ± 0	0/11	2/11	0/11	0/10
ASV 1385	Bacteroidetes	Bacteroidia	NA	NA	NA	0 ± 0	0 ± 0	0 ± 0	0.2 ± 0.2	0/11	0/11	0/11	1/10
ASV 1400	Proteobacteria	Gammaproteobacteria	NA	NA	NA	0.27 ± 0.27	0.09 ± 0.09	0 ± 0	0 ± 0	1/11	1/11	0/11	0/10
ASV 1408	Proteobacteria	Alphaproteobacteria	Rhizobiales	Beijerinckiaceae	Bosea	0 ± 0	0.18 ± 0.18	0 ± 0	0 ± 0	0/11	1/11	0/11	0/10
ASV 1409	Proteobacteria	Alphaproteobacteria	Rhodobacterales	Rhodobacteraceae	Paracoccus	0 ± 0	0.18 ± 0.18	0 ± 0	0 ± 0	0/11	1/11	0/11	0/10
ASV 1410	Firmicutes	Bacilli	Lactobacillales	Leuconostocaceae	Leuconostoc	0 ± 0	0.18 ± 0.18	0 ± 0	0 ± 0	0/11	1/11	0/11	0/10
ASV 1420	Proteobacteria	Gammaproteobacteria	Enterobacteriales	Enterobacteriaceae	NA	0 ± 0	0 ± 0	0.09 ± 0.09	0 ± 0	0/11	0/11	1/11	0/10
ASV 1432	Proteobacteria	Alphaproteobacteria	Caulobacterales	Caulobacteraceae	Brevundimonas	0 ± 0	0.18 ± 0.18	0 ± 0	0 ± 0	0/11	1/11	0/11	0/10
ASV 1433	Proteobacteria	Alphaproteobacteria	Sphingomonadales	Sphingomonadaceae	Sphingomonas	0 ± 0	0.27 ± 0.27	0 ± 0	0 ± 0	0/11	1/11	0/11	0/10
ASV 1434	Proteobacteria	Gammaproteobacteria	Enterobacteriales	Enterobacteriaceae	NA	0 ± 0	0 ± 0	0.09 ± 0.09	0 ± 0	0/11	0/11	1/11	0/10
ASV 1435	Proteobacteria	Alphaproteobacteria	Rhizobiales	Devosiaceae	Pelagibacterium	0 ± 0	0 ± 0	0 ± 0	0.2 ± 0.2	0/11	0/11	0/11	1/10
ASV 1444	Bacteroidetes	Bacteroidia	Cytophagales	Spirosomaceae	Dyadobacter	0 ± 0	0.18 ± 0.18	0 ± 0	0 ± 0	0/11	1/11	0/11	0/10
ASV 1447	Bacteroidetes	Bacteroidia	Sphingobacteriales	Sphingobacteriaceae	Sphingobacterium	0.18 ± 0.18	0 ± 0	0 ± 0	0 ± 0	1/11	0/11	0/11	0/10
ASV 1448	Proteobacteria	Alphaproteobacteria	Rhizobiales	Beijerinckiaceae	Bosea	0 ± 0	0.18 ± 0.18	0 ± 0	0 ± 0	0/11	1/11	0/11	0/10
ASV 1450	Proteobacteria	Alphaproteobacteria	Rhizobiales	Rhizobiaceae	Pseudochrobactrum	0 ± 0	0 ± 0	0 ± 0	0.1 ± 0.1	0/11	0/11	0/11	1/10
ASV 1451	Proteobacteria	Alphaproteobacteria	Rhizobiales	Rhizobiaceae	Ochrobactrum	0 ± 0	0 ± 0	0 ± 0	0.2 ± 0.2	0/11	0/11	0/11	1/10
ASV 1463	Proteobacteria	Alphaproteobacteria	Rhodobacterales	Rhodobacteraceae	Paracoccus	0 ± 0	0 ± 0	0 ± 0	0.3 ± 0.21	0/11	0/11	0/11	2/10
ASV 1464	Bacteroidetes	Bacteroidia	Flavobacteriales	Flavobacteriaceae	Flavobacterium	0 ± 0	0 ± 0	0 ± 0	0.3 ± 0.3	0/11	0/11	0/11	1/10
ASV 1465	Proteobacteria	Alphaproteobacteria	Rhizobiales	Rhizobiaceae	Ochrobactrum	0 ± 0	0 ± 0	0 ± 0	0.5 ± 0.5	0/11	0/11	0/11	1/10
ASV 1473	Proteobacteria	Gammaproteobacteria	Pseudomonadales	Pseudomonadaceae	Pseudomonas	0 ± 0	0 ± 0	0.18 ± 0.18	0 ± 0	0/11	0/11	1/11	0/10
ASV 1475	Bacteroidetes	Bacteroidia	Cytophagales	Spirosomaceae	Dyadobacter	0 ± 0	0 ± 0	0 ± 0	0.2 ± 0.2	0/11	0/11	0/11	1/10
ASV 1476	Proteobacteria	Alphaproteobacteria	Rhizobiales	Rhizobiaceae	Paenochrobactrum	0 ± 0	0 ± 0	0 ± 0	0.3 ± 0.21	0/11	0/11	0/11	2/10
ASV 1486	Bacteroidetes	Bacteroidia	Flavobacteriales	Flavobacteriaceae	Flavobacterium	0.27 ± 0.27	0 ± 0	0 ± 0	0 ± 0	1/11	0/11	0/11	0/10
ASV 1501	Bacteroidetes	Bacteroidia	Cytophagales	Spirosomaceae	Dyadobacter	0.09 ± 0.09	0.18 ± 0.18	0 ± 0	0 ± 0	1/11	1/11	0/11	0/10
ASV 1502	Proteobacteria	Alphaproteobacteria	Acetobacterales	Acetobacteraceae	Roseomonas	0 ± 0	0.18 ± 0.18	0 ± 0	0 ± 0	0/11	1/11	0/11	0/10
ASV 1503	Proteobacteria	Alphaproteobacteria	Sphingomonadales	Sphingomonadaceae	Novosphingobium	0 ± 0	0 ± 0	0 ± 0	0.3 ± 0.3	0/11	0/11	0/11	1/10
ASV 1507	Proteobacteria	Alphaproteobacteria	Rhizobiales	Rhizobiaceae	Shinella	0 ± 0	0.18 ± 0.18	0 ± 0	0 ± 0	0/11	1/11	0/11	0/10
ASV 1517	Proteobacteria	Alphaproteobacteria	Rhizobiales	Rhizobiaceae	Aminobacter	0 ± 0	0 ± 0	0 ± 0	0.3 ± 0.3	0/11	0/11	0/11	1/10
ASV 1518	Proteobacteria	Alphaproteobacteria	Sphingomonadales	Sphingomonadaceae	Novosphingobium	0 ± 0	0 ± 0	0 ± 0	0.4 ± 0.4	0/11	0/11	0/11	1/10
ASV 1528	Proteobacteria	Gammaproteobacteria	Cellvibrionales	Cellvibrionaceae	Cellvibrio	0.36 ± 0.36	0 ± 0	0 ± 0	0 ± 0	1/11	0/11	0/11	0/10
ASV 1529	Proteobacteria	Alphaproteobacteria	Rhodobacterales	Rhodobacteraceae	Gemmobacter	0 ± 0	0 ± 0	0 ± 0	0.2 ± 0.2	0/11	0/11	0/11	1/10
ASV 1538	Bacteroidetes	Bacteroidia	Cytophagales	Spirosomaceae	Dyadobacter	0.18 ± 0.18	0 ± 0	0 ± 0	0 ± 0	1/11	0/11	0/11	0/10
ASV 1541	Proteobacteria	Alphaproteobacteria	Rhizobiales	Devosiaceae	Devosia	0 ± 0	0 ± 0	0 ± 0	0.2 ± 0.2	0/11	0/11	0/11	1/10
ASV 1559	Proteobacteria	Gammaproteobacteria	Xanthomonadales	Xanthomonadaceae	Stenotrophomonas	0.09 ± 0.09	0.18 ± 0.18	0 ± 0	0 ± 0	1/11	1/11	0/11	0/10
ASV 1560	Firmicutes	Bacilli	Lactobacillales	Streptococcaceae	Lactococcus	0.27 ± 0.19	0 ± 0	0 ± 0	0 ± 0	2/11	0/11	0/11	0/10
ASV 1561	Bacteroidetes	Bacteroidia	Cytophagales	Spirosomaceae	Dyadobacter	0 ± 0	0.27 ± 0.27	0 ± 0	0 ± 0	0/11	1/11	0/11	0/10
ASV 1562	Proteobacteria	Alphaproteobacteria	Rhodobacterales	Rhodobacteraceae	Gemmobacter	0 ± 0	0 ± 0	0 ± 0	0.2 ± 0.2	0/11	0/11	0/11	1/10
ASV 1570	Proteobacteria	Alphaproteobacteria	Rhizobiales	Beijerinckiaceae	Camelimonas	0.09 ± 0.09	0 ± 0	0 ± 0	0.2 ± 0.2	1/11	0/11	0/11	1/10
ASV 1581	Firmicutes	Bacilli	Lactobacillales	Streptococcaceae	Lactococcus	0.09 ± 0.09	0 ± 0	0.18 ± 0.18	0 ± 0	1/11	0/11	1/11	0/10
ASV 1584	Proteobacteria	Alphaproteobacteria	Caulobacterales	Caulobacteraceae	Brevundimonas	0.27 ± 0.27	0 ± 0	0 ± 0	0 ± 0	1/11	0/11	0/11	0/10
ASV 1585	Bacteroidetes	Bacteroidia	Sphingobacteriales	Sphingobacteriaceae	Pedobacter	0 ± 0	0 ± 0	0 ± 0	0.3 ± 0.21	0/11	0/11	0/11	2/10
ASV 1593	Proteobacteria	Alphaproteobacteria	Rhizobiales	Rhizobiaceae	Allorhizobium-Neorhizobium-Pararhizobium-Rhizobium	0.09 ± 0.09	0.18 ± 0.18	0 ± 0	0 ± 0	1/11	1/11	0/11	0/10
ASV 1594	Firmicutes	Bacilli	Bacillales	Paenibacillaceae	Paenibacillus	0.27 ± 0.27	0 ± 0	0 ± 0	0 ± 0	1/11	0/11	0/11	0/10
ASV 1595	Bacteroidetes	Bacteroidia	Sphingobacteriales	Sphingobacteriaceae	Pedobacter	0 ± 0	0.18 ± 0.18	0 ± 0	0 ± 0	0/11	1/11	0/11	0/10
ASV 1596	Bacteroidetes	Bacteroidia	Sphingobacteriales	Sphingobacteriaceae	Pedobacter	0 ± 0	0.27 ± 0.27	0 ± 0	0 ± 0	0/11	1/11	0/11	0/10
ASV 1597	Proteobacteria	Alphaproteobacteria	Rhizobiales	Devosiaceae	Devosia	0 ± 0	0.18 ± 0.18	0 ± 0	0 ± 0	0/11	1/11	0/11	0/10
ASV 1598	Proteobacteria	Alphaproteobacteria	Sphingomonadales	Sphingomonadaceae	Sphingomonas	0 ± 0	0.36 ± 0.36	0 ± 0	0 ± 0	0/11	1/11	0/11	0/10
ASV 1599	Proteobacteria	Gammaproteobacteria	Betaproteobacteriales	Methylophilaceae	MM2	0 ± 0	0 ± 0	0 ± 0	0.2 ± 0.2	0/11	0/11	0/11	1/10
ASV 1600	Proteobacteria	Alphaproteobacteria	Rhizobiales	Rhizobiaceae	Aminobacter	0 ± 0	0 ± 0	0 ± 0	0.2 ± 0.2	0/11	0/11	0/11	1/10
ASV 1601	Proteobacteria	Alphaproteobacteria	Rhizobiales	Devosiaceae	Pelagibacterium	0 ± 0	0 ± 0	0 ± 0	0.2 ± 0.2	0/11	0/11	0/11	1/10
ASV 1602	Proteobacteria	Gammaproteobacteria	Pseudomonadales	Moraxellaceae	Acinetobacter	0 ± 0	0 ± 0	0 ± 0	0.2 ± 0.2	0/11	0/11	0/11	1/10
ASV 1612	Proteobacteria	Gammaproteobacteria	Pseudomonadales	Pseudomonadaceae	Pseudomonas	0 ± 0	0 ± 0	0.18 ± 0.18	0 ± 0	0/11	0/11	1/11	0/10
ASV 1613	Proteobacteria	Alphaproteobacteria	Rhizobiales	Devosiaceae	Devosia	0.09 ± 0.09	0.18 ± 0.18	0 ± 0	0 ± 0	1/11	1/11	0/11	0/10
ASV 1614	Proteobacteria	Gammaproteobacteria	Cellvibrionales	Cellvibrionaceae	Cellvibrio	0.18 ± 0.18	0 ± 0	0 ± 0	0 ± 0	1/11	0/11	0/11	0/10
ASV 1633	Proteobacteria	Alphaproteobacteria	Acetobacterales	Acetobacteraceae	Roseomonas	0 ± 0	0.18 ± 0.18	0 ± 0	0 ± 0	0/11	1/11	0/11	0/10
ASV 1634	Bacteroidetes	Bacteroidia	Flavobacteriales	Flavobacteriaceae	Flavobacterium	0 ± 0	0.36 ± 0.36	0 ± 0	0 ± 0	0/11	1/11	0/11	0/10
ASV 1635	Proteobacteria	Alphaproteobacteria	Azospirillales	Azospirillaceae	Azospirillum	0 ± 0	0.18 ± 0.18	0 ± 0	0 ± 0	0/11	1/11	0/11	0/10
ASV 1651	Bacteroidetes	Bacteroidia	Sphingobacteriales	Sphingobacteriaceae	Sphingobacterium	0 ± 0	0.18 ± 0.18	0 ± 0	0 ± 0	0/11	1/11	0/11	0/10
ASV 1652	Firmicutes	Bacilli	Lactobacillales	Streptococcaceae	Lactococcus	0 ± 0	0.09 ± 0.09	0.18 ± 0.18	0 ± 0	0/11	1/11	1/11	0/10
ASV 1653	Bacteroidetes	Bacteroidia	Sphingobacteriales	Sphingobacteriaceae	Sphingobacterium	0 ± 0	0.18 ± 0.18	0 ± 0	0 ± 0	0/11	1/11	0/11	0/10
ASV 1657	Bacteroidetes	Bacteroidia	Sphingobacteriales	Sphingobacteriaceae	NA	0 ± 0	0 ± 0	0 ± 0	0.2 ± 0.2	0/11	0/11	0/11	1/10
ASV 1666	Bacteroidetes	Bacteroidia	Sphingobacteriales	Sphingobacteriaceae	Pedobacter	0.18 ± 0.18	0 ± 0	0 ± 0	0 ± 0	1/11	0/11	0/11	0/10
ASV 1675	Bacteroidetes	Bacteroidia	Chitinophagales	Chitinophagaceae	Chitinophaga	0.36 ± 0.36	0 ± 0	0 ± 0	0 ± 0	1/11	0/11	0/11	0/10
ASV 1694	Bacteroidetes	Bacteroidia	Flavobacteriales	Flavobacteriaceae	Flavobacterium	0.18 ± 0.18	0 ± 0	0 ± 0	0 ± 0	1/11	0/11	0/11	0/10
ASV 1695	Bacteroidetes	Bacteroidia	Sphingobacteriales	Sphingobacteriaceae	Sphingobacterium	0.09 ± 0.09	0.18 ± 0.18	0 ± 0	0 ± 0	1/11	1/11	0/11	0/10
ASV 1699	Proteobacteria	Gammaproteobacteria	Betaproteobacteriales	Methylophilaceae	NA	0 ± 0	0 ± 0	0 ± 0	0.2 ± 0.2	0/11	0/11	0/11	1/10
ASV 1700	Bacteroidetes	Bacteroidia	Sphingobacteriales	Sphingobacteriaceae	NA	0 ± 0	0 ± 0	0 ± 0	0.2 ± 0.2	0/11	0/11	0/11	1/10
ASV 1725	Bacteroidetes	Bacteroidia	Flavobacteriales	Weeksellaceae	Moheibacter	0.18 ± 0.18	0 ± 0	0 ± 0	0 ± 0	1/11	0/11	0/11	0/10
ASV 1726	Proteobacteria	Gammaproteobacteria	Steroidobacterales	Steroidobacteraceae	Steroidobacter	0 ± 0	0.36 ± 0.36	0 ± 0	0 ± 0	0/11	1/11	0/11	0/10
ASV 1727	Bacteroidetes	Bacteroidia	Sphingobacteriales	Sphingobacteriaceae	Sphingobacterium	0 ± 0	0.18 ± 0.18	0 ± 0	0 ± 0	0/11	1/11	0/11	0/10
ASV 1728	Proteobacteria	Alphaproteobacteria	Rhizobiales	Beijerinckiaceae	Bosea	0 ± 0	0 ± 0	0.27 ± 0.27	0 ± 0	0/11	0/11	1/11	0/10
ASV 1730	Proteobacteria	Deltaproteobacteria	Bdellovibrionales	Bacteriovoracaceae	Peredibacter	0 ± 0	0 ± 0	0 ± 0	0.3 ± 0.21	0/11	0/11	0/11	2/10
ASV 1731	Bacteroidetes	Bacteroidia	Flavobacteriales	Flavobacteriaceae	Flavobacterium	0 ± 0	0 ± 0	0 ± 0	0.2 ± 0.2	0/11	0/11	0/11	1/10
ASV 1748	Bacteroidetes	Bacteroidia	Flavobacteriales	Weeksellaceae	Moheibacter	0.27 ± 0.27	0 ± 0	0 ± 0	0 ± 0	1/11	0/11	0/11	0/10
ASV 1749	Firmicutes	Bacilli	Lactobacillales	Streptococcaceae	Streptococcus	0.18 ± 0.18	0 ± 0	0 ± 0	0 ± 0	1/11	0/11	0/11	0/10
ASV 1750	Bacteroidetes	Bacteroidia	Cytophagales	Spirosomaceae	Dyadobacter	0.18 ± 0.18	0 ± 0	0 ± 0	0 ± 0	1/11	0/11	0/11	0/10
ASV 1751	Bacteroidetes	Bacteroidia	Flavobacteriales	Flavobacteriaceae	Flavobacterium	0.27 ± 0.27	0 ± 0	0 ± 0	0 ± 0	1/11	0/11	0/11	0/10
ASV 1752	Proteobacteria	Alphaproteobacteria	Rhizobiales	Rhizobiaceae	Aminobacter	0 ± 0	0.27 ± 0.27	0 ± 0	0 ± 0	0/11	1/11	0/11	0/10
ASV 1754	Firmicutes	Bacilli	Bacillales	Bacillaceae	NA	0 ± 0	0 ± 0	0 ± 0	0.2 ± 0.2	0/11	0/11	0/11	1/10
ASV 1773	Bacteroidetes	Bacteroidia	Flavobacteriales	Flavobacteriaceae	Flavobacterium	0 ± 0	0.18 ± 0.18	0 ± 0	0 ± 0	0/11	1/11	0/11	0/10
ASV 1774	Proteobacteria	Gammaproteobacteria	Cellvibrionales	Cellvibrionaceae	Cellvibrio	0 ± 0	0.18 ± 0.18	0 ± 0	0 ± 0	0/11	1/11	0/11	0/10
ASV 1796	Bacteroidetes	Bacteroidia	Cytophagales	Spirosomaceae	Dyadobacter	0.27 ± 0.27	0 ± 0	0 ± 0	0 ± 0	1/11	0/11	0/11	0/10
ASV 1798	Bacteroidetes	Bacteroidia	Chitinophagales	Chitinophagaceae	Niabella	0 ± 0	0.18 ± 0.18	0 ± 0	0 ± 0	0/11	1/11	0/11	0/10
ASV 1799	Proteobacteria	Alphaproteobacteria	Caulobacterales	Caulobacteraceae	Brevundimonas	0 ± 0	0.18 ± 0.18	0 ± 0	0 ± 0	0/11	1/11	0/11	0/10
ASV 1800	Proteobacteria	Gammaproteobacteria	Pseudomonadales	Moraxellaceae	Acinetobacter	0 ± 0	0.18 ± 0.18	0 ± 0	0 ± 0	0/11	1/11	0/11	0/10
ASV 1802	Proteobacteria	Gammaproteobacteria	Enterobacteriales	Enterobacteriaceae	Enterobacter	0 ± 0	0 ± 0	0 ± 0	0.3 ± 0.3	0/11	0/11	0/11	1/10
ASV 1818	Bacteroidetes	Bacteroidia	Cytophagales	Cytophagaceae	Sporocytophaga	0 ± 0	0 ± 0	0.18 ± 0.18	0 ± 0	0/11	0/11	1/11	0/10
ASV 1820	Proteobacteria	Alphaproteobacteria	Azospirillales	Azospirillaceae	Azospirillum	0 ± 0	0.18 ± 0.18	0 ± 0	0 ± 0	0/11	1/11	0/11	0/10
ASV 1822	Bacteroidetes	Bacteroidia	Sphingobacteriales	Sphingobacteriaceae	Sphingobacterium	0 ± 0	0.18 ± 0.18	0 ± 0	0 ± 0	0/11	1/11	0/11	0/10
ASV 1836	Firmicutes	Bacilli	Bacillales	Planococcaceae	Lysinibacillus	0 ± 0	0 ± 0	0 ± 0	0.2 ± 0.2	0/11	0/11	0/11	1/10
ASV 1837	Bacteroidetes	Bacteroidia	Sphingobacteriales	Sphingobacteriaceae	Sphingobacterium	0 ± 0	0.18 ± 0.18	0 ± 0	0 ± 0	0/11	1/11	0/11	0/10
ASV 1847	Proteobacteria	Gammaproteobacteria	Enterobacteriales	Enterobacteriaceae	Raoultella	0 ± 0	0 ± 0	0.18 ± 0.18	0 ± 0	0/11	0/11	1/11	0/10
ASV 1860	Proteobacteria	Alphaproteobacteria	Rhizobiales	Rhizobiaceae	Allorhizobium-Neorhizobium-Pararhizobium-Rhizobium	0.18 ± 0.18	0 ± 0	0 ± 0	0 ± 0	1/11	0/11	0/11	0/10
ASV 1883	Proteobacteria	Gammaproteobacteria	Betaproteobacteriales	Burkholderiaceae	Hylemonella	0 ± 0	0.18 ± 0.18	0 ± 0	0 ± 0	0/11	1/11	0/11	0/10
ASV 1886	Proteobacteria	Alphaproteobacteria	Rhizobiales	Beijerinckiaceae	Methylobacterium	0 ± 0	0.18 ± 0.18	0 ± 0	0 ± 0	0/11	1/11	0/11	0/10
ASV 1889	Proteobacteria	Alphaproteobacteria	Sphingomonadales	Sphingomonadaceae	NA	0 ± 0	0.18 ± 0.18	0 ± 0	0 ± 0	0/11	1/11	0/11	0/10
ASV 1893	Proteobacteria	Alphaproteobacteria	Rhizobiales	Devosiaceae	Devosia	0 ± 0	0 ± 0	0 ± 0	0.2 ± 0.2	0/11	0/11	0/11	1/10
ASV 1914	Proteobacteria	Alphaproteobacteria	Rhizobiales	Rhizobiaceae	Aminobacter	0.27 ± 0.27	0 ± 0	0 ± 0	0 ± 0	1/11	0/11	0/11	0/10
ASV 1915	Firmicutes	Bacilli	Lactobacillales	Aerococcaceae	Facklamia	0.18 ± 0.18	0 ± 0	0 ± 0	0 ± 0	1/11	0/11	0/11	0/10
ASV 1916	Bacteroidetes	Bacteroidia	Sphingobacteriales	Sphingobacteriaceae	Pedobacter	0.18 ± 0.18	0 ± 0	0 ± 0	0 ± 0	1/11	0/11	0/11	0/10
ASV 1917	Bacteroidetes	Bacteroidia	Sphingobacteriales	Sphingobacteriaceae	NA	0.18 ± 0.18	0 ± 0	0 ± 0	0 ± 0	1/11	0/11	0/11	0/10
ASV 1920	Proteobacteria	Alphaproteobacteria	Rhizobiales	Rhizobiaceae	Allorhizobium-Neorhizobium-Pararhizobium-Rhizobium	0 ± 0	0 ± 0	0 ± 0	0.2 ± 0.2	0/11	0/11	0/11	1/10
ASV 1921	Proteobacteria	Alphaproteobacteria	Rhizobiales	Rhizobiaceae	Nitratireductor	0 ± 0	0 ± 0	0 ± 0	0.2 ± 0.2	0/11	0/11	0/11	1/10
ASV 1943	Bacteroidetes	Bacteroidia	Sphingobacteriales	Sphingobacteriaceae	Sphingobacterium	0 ± 0	0.18 ± 0.18	0 ± 0	0 ± 0	0/11	1/11	0/11	0/10
ASV 1973	Proteobacteria	Alphaproteobacteria	Rhizobiales	Rhizobiaceae	Paenochrobactrum	0 ± 0	0 ± 0	0 ± 0	0.2 ± 0.2	0/11	0/11	0/11	1/10
ASV 1974	Proteobacteria	Alphaproteobacteria	Rhizobiales	Devosiaceae	Devosia	0 ± 0	0 ± 0	0 ± 0	0.2 ± 0.2	0/11	0/11	0/11	1/10
ASV 1993	Bacteroidetes	Bacteroidia	Sphingobacteriales	Sphingobacteriaceae	Sphingobacterium	0 ± 0	0.18 ± 0.18	0 ± 0	0 ± 0	0/11	1/11	0/11	0/10
ASV 1996	Bacteroidetes	Bacteroidia	Flavobacteriales	Flavobacteriaceae	Flavobacterium	0 ± 0	0.18 ± 0.18	0 ± 0	0 ± 0	0/11	1/11	0/11	0/10
ASV 2015	Proteobacteria	Alphaproteobacteria	Caulobacterales	Caulobacteraceae	Brevundimonas	0.18 ± 0.18	0 ± 0	0 ± 0	0 ± 0	1/11	0/11	0/11	0/10
ASV 2019	Bacteroidetes	Bacteroidia	Chitinophagales	Chitinophagaceae	Terrimonas	0.18 ± 0.18	0 ± 0	0 ± 0	0 ± 0	1/11	0/11	0/11	0/10
ASV 2020	Bacteroidetes	Bacteroidia	Cytophagales	Spirosomaceae	Dyadobacter	0 ± 0	0.18 ± 0.18	0 ± 0	0 ± 0	0/11	1/11	0/11	0/10
ASV 2023	Bacteroidetes	Bacteroidia	Flavobacteriales	Weeksellaceae	Moheibacter	0 ± 0	0 ± 0	0.18 ± 0.18	0 ± 0	0/11	0/11	1/11	0/10
ASV 2044	Bacteroidetes	Bacteroidia	Sphingobacteriales	Sphingobacteriaceae	Sphingobacterium	0.18 ± 0.18	0 ± 0	0 ± 0	0 ± 0	1/11	0/11	0/11	0/10
ASV 2045	Bacteroidetes	Bacteroidia	Sphingobacteriales	Sphingobacteriaceae	Sphingobacterium	0.18 ± 0.18	0 ± 0	0 ± 0	0 ± 0	1/11	0/11	0/11	0/10
ASV 2046	Bacteroidetes	Bacteroidia	Sphingobacteriales	Sphingobacteriaceae	Sphingobacterium	0.18 ± 0.18	0 ± 0	0 ± 0	0 ± 0	1/11	0/11	0/11	0/10
ASV 2047	Bacteroidetes	Bacteroidia	Chitinophagales	Chitinophagaceae	NA	0 ± 0	0.18 ± 0.18	0 ± 0	0 ± 0	0/11	1/11	0/11	0/10
ASV 2056	Proteobacteria	Alphaproteobacteria	Rhizobiales	Rhizobiaceae	Nitratireductor	0 ± 0	0 ± 0	0 ± 0	0.2 ± 0.2	0/11	0/11	0/11	1/10
ASV 2057	Proteobacteria	Alphaproteobacteria	Rhizobiales	Rhizobiaceae	Ciceribacter	0 ± 0	0 ± 0	0 ± 0	0.2 ± 0.2	0/11	0/11	0/11	1/10
ASV 2078	Bacteroidetes	Bacteroidia	Sphingobacteriales	Sphingobacteriaceae	Sphingobacterium	0.18 ± 0.18	0 ± 0	0 ± 0	0 ± 0	1/11	0/11	0/11	0/10
ASV 2082	Proteobacteria	Alphaproteobacteria	Sphingomonadales	Sphingomonadaceae	Sphingomonas	0 ± 0	0 ± 0	0 ± 0	0.2 ± 0.2	0/11	0/11	0/11	1/10
ASV 2130	Proteobacteria	Alphaproteobacteria	Reyranellales	Reyranellaceae	Reyranella	0.18 ± 0.18	0 ± 0	0 ± 0	0 ± 0	1/11	0/11	0/11	0/10
ASV 2140	Proteobacteria	Alphaproteobacteria	Rhizobiales	Rhizobiaceae	Shinella	0.18 ± 0.18	0 ± 0	0 ± 0	0 ± 0	1/11	0/11	0/11	0/10
ASV 2167	Proteobacteria	Gammaproteobacteria	Enterobacteriales	Enterobacteriaceae	NA	0 ± 0	0.18 ± 0.18	0 ± 0	0 ± 0	0/11	1/11	0/11	0/10
ASV 2200	Bacteroidetes	Bacteroidia	Sphingobacteriales	Sphingobacteriaceae	Sphingobacterium	0 ± 0	0 ± 0	0 ± 0	0.2 ± 0.2	0/11	0/11	0/11	1/10
ASV 2230	Proteobacteria	Alphaproteobacteria	Rhizobiales	Rhizobiaceae	Pseudochrobactrum	0.18 ± 0.18	0 ± 0	0 ± 0	0 ± 0	1/11	0/11	0/11	0/10
ASV 2232	Bacteroidetes	Bacteroidia	Sphingobacteriales	Sphingobacteriaceae	Sphingobacterium	0.18 ± 0.18	0 ± 0	0 ± 0	0 ± 0	1/11	0/11	0/11	0/10
ASV 2235	Proteobacteria	Gammaproteobacteria	Betaproteobacteriales	Burkholderiaceae	Hydrogenophaga	0 ± 0	0.18 ± 0.18	0 ± 0	0 ± 0	0/11	1/11	0/11	0/10
ASV 2319	Firmicutes	Bacilli	Bacillales	Paenibacillaceae	Paenibacillus	0.18 ± 0.18	0 ± 0	0 ± 0	0 ± 0	1/11	0/11	0/11	0/10
ASV 2418	Proteobacteria	Gammaproteobacteria	Pseudomonadales	Moraxellaceae	Alkanindiges	0.18 ± 0.18	0 ± 0	0 ± 0	0 ± 0	1/11	0/11	0/11	0/10
ASV 2431	Proteobacteria	Alphaproteobacteria	Rhodobacterales	Rhodobacteraceae	NA	0 ± 0	0 ± 0	0 ± 0	0.2 ± 0.2	0/11	0/11	0/11	1/10
